# Supplementary material for: Molybdenum carbonyl assisted reductive tetramerization of CO by activated magnesium( i ) compounds: squarate dianion vs. metallo-ketene formation
Source: Royal Society of Chemistry journal article supplement (doi:10.1039/d3sc01487h), 2023-01-01
Supplement: d3sc01487h1.pdf [file d3sc01487h1.pdf]

# **Molybdenum Carbonyl Assisted Reductive Tetramerization of CO by Activated Magnesium(I) Compounds: Squarate Dianion vs. Metallo-Ketene Formation**

K. Yuvaraj,<sup>a,‡</sup> Jeremy C. Mullins,<sup>a</sup> Thayalan Rajeshkumar,<sup>b</sup> Iskander Douair,<sup>b</sup> Laurent Maron,<sup>\*b</sup>

Cameron Jones<sup>\*a</sup>

<sup>a</sup> *School of Chemistry, PO Box 23, Monash University, VIC, 3800, Australia.*

<sup>b</sup> *Université de Toulouse et CNRS, INSA, UPS, UMR 5215, LPCNO, 135 Avenue de Rangueil, F-31077 Toulouse, France.*

<sup>‡</sup> *Current address: Department of Chemistry, Indian Institute of Technology Palakkad, Palakkad-678557, Kerala, India.*

## **Electronic Supplementary Information (52 pages)**

|                 |                                          |            |
|-----------------|------------------------------------------|------------|
| <b>Contents</b> | <b>1. Experimental and Spectra</b>       | <b>S2</b>  |
|                 | <b>2. X-Ray Crystallographic Studies</b> | <b>S21</b> |
|                 | <b>3. Computational Studies</b>          | <b>S27</b> |
|                 | <b>4. References</b>                     | <b>S51</b> |

## 1. Experimental and Spectra

### General considerations.

All manipulations were carried out using standard Schlenk and glove box techniques under an atmosphere of high purity dinitrogen. Benzene, *n*-hexane, toluene and THF were distilled over molten potassium.  $^1\text{H}$  and  $^{13}\text{C}\{^1\text{H}\}$  NMR spectra were recorded on Bruker Avance Neo 400 or Bruker Avance III 600 spectrometers and were referenced to the resonances of the solvent used or external  $\text{SiMe}_4$ . FTIR spectra were collected for solid samples or Nujol mulls on an Agilent Cary 630 attenuated total reflectance (ATR) spectrometer. Microanalyses were carried out at the Science Centre, London Metropolitan University, or using a PerkinElmer-2400 CHNS/O Series II System. Melting points were determined in sealed glass capillaries under dinitrogen and are uncorrected. The compounds  $[\{(\text{DipNacnac})\text{Mg}\}_2]$ ,<sup>1</sup>  $[\{(\text{Priso})\text{Mg}\}_2]$ ,<sup>2</sup> and  $:\text{C}\{\text{N}(\text{Me})\text{C}(\text{Me})\}_2$  (TMC)<sup>3</sup> were prepared according to literature procedures. CO gas was dried over  $\text{P}_2\text{O}_5$  prior to use. All other reagents were used as received.

**Synthesis of  $[\{(\text{DipNacnac})\text{Mg}\}(\text{C}_4\text{O}_4)\{\mu\text{-Mg}(\text{DipNacnac})\}_2]$  **4** and  $[\{(\text{DipNacnac})\text{Mg}\}\{\mu\text{-}(\text{C}_4\text{O}_4)\text{Mo}(\text{CO})_5\}\{\text{Mg}(\text{DMAP})(\text{DipNacnac})\}]$  **5**.**  $[\{(\text{DipNacnac})\text{Mg}\}_2]$  (150 mg, 0.170, mmol) and DMAP (21 mg, 0.170 mmol) were dissolved in 5 mL of toluene at room temperature, resulting in an orange-red solution. This reaction mixture was then quickly added to a suspension of  $\text{Mo}(\text{CO})_6$  (45 mg, 0.170 mmol) in toluene (1 mL) at room temperature, then the reaction vessel placed under vacuum, backfilled with excess CO gas (*ca.* 100 mL), then sealed. The resultant mixture was stirred for 12 h at room temperature, yielding a dark red solution. The mixture was then filtered, and the filtrate was concentrated to *ca.* 3 mL *in vacuo*, then placed at  $-30\text{ }^\circ\text{C}$  for 1 d, after which time orange crystals of **5** had deposited (74 mg, 32 %). These crystals were isolated, the mother liquor concentrated to *ca.* 1 mL, then stored at  $-30\text{ }^\circ\text{C}$  for 1 d, which afforded colourless crystals of **4** (17 mg, 10 %). Data for **4**: M.p.  $> 260\text{ }^\circ\text{C}$ ;  $^1\text{H}$  NMR (400 MHz, 298 K,  $\text{C}_6\text{D}_6$ ):  $\delta = 0.43$  (v. br., 24H,  $\text{CH}(\text{CH}_3)_2$ ), 0.92 (v. br., 24H,  $\text{CH}(\text{CH}_3)_2$ ), 1.18 (br., 48H,  $\text{CH}(\text{CH}_3)_2$ ), 1.61 (s, 12H,  $\text{NCCH}_3$ ), 1.66 (s, 12H,  $\text{NCCH}_3$ ), 2.99-3.07 (br., m, 16H,  $\text{CH}(\text{CH}_3)_2$ ), 4.78 (s, 2H,  $\beta\text{-CH}$ ), 4.98 (s, 2H,  $\beta\text{-CH}$ ), 6.96–7.36 (m, 24H, Ar-H); N.B. once crystallised, compound **4** has minimal solubility in non-coordinating deuterated solvents such as  $\text{C}_6\text{D}_6$  and toluene- $d_8$ , which precluded the acquisition of meaningful  $^{13}\text{C}\{^1\text{H}\}$  NMR spectroscopic data. Further, compound **4** slowly decomposes to protonated ligand,  $\text{DipNacnacH}$ , when dissolved in  $d_8$ -THF; IR  $\nu/\text{cm}^{-1}$  (Nujol): 1622

(w), 1512 (w), 1262 (w), 1229 (m), 1176 (m), 1101 (m), 1020 (w), 930 (m), 793 (s); anal. calc. for  $C_{124}H_{164}Mg_4N_8O_8$ : C 74.77 %, H 8.30 %, N 5.63 %; found: C 73.39 %, H 8.99 %, N 5.56 %.

Data for **5**: M.p. 159-161 °C (decomp.); Accurate integration of the resonances in the  $^1H$  NMR spectrum was not possible due to the broad and often overlapping nature of those resonances. Thus, the integrations are estimated.  $^1H$  NMR (400 MHz, 298 K,  $C_6D_6$ ):  $\delta$  = 0.48 (v. br., 6H,  $CH(CH_3)_2$ ), 0.67 (v. br., 6H,  $CH(CH_3)_2$ ), 0.86 (br., 12H,  $CH(CH_3)_2$ ), 1.10 (br., 12H,  $CH(CH_3)_2$ ), 1.23 (br., 12H,  $CH(CH_3)_2$ ), 1.60 (s, 6H,  $NCCH_3$ ), 1.64 (s, 6H,  $NCCH_3$ ), 1.85 (s, 6H,  $^{DMAP}N(CH_3)_2$ ), 3.03 (br., m, 2H,  $CH(CH_3)_2$ ), 3.11 (br., m, 2H,  $CH(CH_3)_2$ ), 3.38 (br., m, 2H,  $CH(CH_3)_2$ ), 3.44 (br., m, 2H,  $CH(CH_3)_2$ ), 4.85 (s, 1H,  $\beta$ -CH), 4.99 (s, 1H,  $\beta$ -CH), 5.61 (d, 2H,  $^{DMAP}Ar-H$ ), 6.69 (d, 2H,  $^{DMAP}Ar-H$ ), 7.01–7.29 (m, 12H,  $Ar-H$ );  $^{13}C\{^1H\}$  NMR (151 MHz,  $C_6D_6$ , 298 K):  $\delta$  = 23.1, 23.4 ( $NCCH_3$ ), 23.7, 23.8, 23.9, 24.1, 24.30, 24.32, 24.50, 24.59, 24.6, 24.7, 24.9, 26.1 ( $CH(CH_3)_2$ ), 28.1, 28.3, 28.4, 28.6 ( $CH(CH_3)_2$ ), 37.9 ( $^{DMAP}N(CH_3)_2$ ), 95.2, 96.6 ( $\beta$ -CH), 106.8, 123.1, 123.4, 123.6, 123.7, 124.4, 124.9, 125.6, 125.8, 136.4, 141.4, 142.4, 142.8, 143.7, 144.0, 145.2, 147.6, 155.0 ( $Ar-C$ ), 162.1 ( $NCCH_3$ ), 167.4 ( $C_2O_3$ ), 169.7 ( $NCCH_3$ ), 170.1 ( $C:C=O$ ), 191.1 ( $C_2O_3$ ), 207.7, 214.9 ( $Mo(CO)_5$ ), N.B ( $O=CC:Mo(CO)_5$ ) resonance was not observed; IR  $\nu/cm^{-1}$  (Nujol): 2072 (m), 2042 (m), 1974 (w), 1914 (s), 1876 (s), 1618 (s), 1539 (m), 1515 (m), 1262 (w), 1228 (s), 1175 (m), 1101 (m), 1013 (w), 949 (m), 795 (m); anal. calc. for  $C_{74}H_{93}Mg_2MoN_6O_9$ : C 65.39 %, H 6.92 %, N 6.20 %; found: C 65.28 %, H 6.79 %, N 6.08 %.

**Higher yield synthesis of 4.** [ $\{^{Dip}Nacnac\}Mg\}_2$ ] (150 mg, 0.170, mmol) and DMAP (21 mg, 0.170 mmol) were dissolved in 5 mL of toluene at room temperature, resulting in an orange-red solution. This was then quickly added to a toluene (1 mL) suspension of  $Mo(CO)_6$  (45 mg, 0.170 mmol) at room temperature. The reaction vessel was placed under vacuum, backfilled with excess CO gas (*ca.* 100 mL), then sealed. The mixture was placed in a preheated oil bath at 80 °C for 14 h, yielding a dark red solution. The mixture was then cooled to room temperature and left for 1 d, after which time colourless crystals of **4** had deposited. These were isolated by filtration (43 mg, 25 %). N.B A few yellow crystals of *cis*- $[Mo(CO)_4(DMAP)_2]$  were isolated from the mother liquor, and identified using X-ray crystallography.

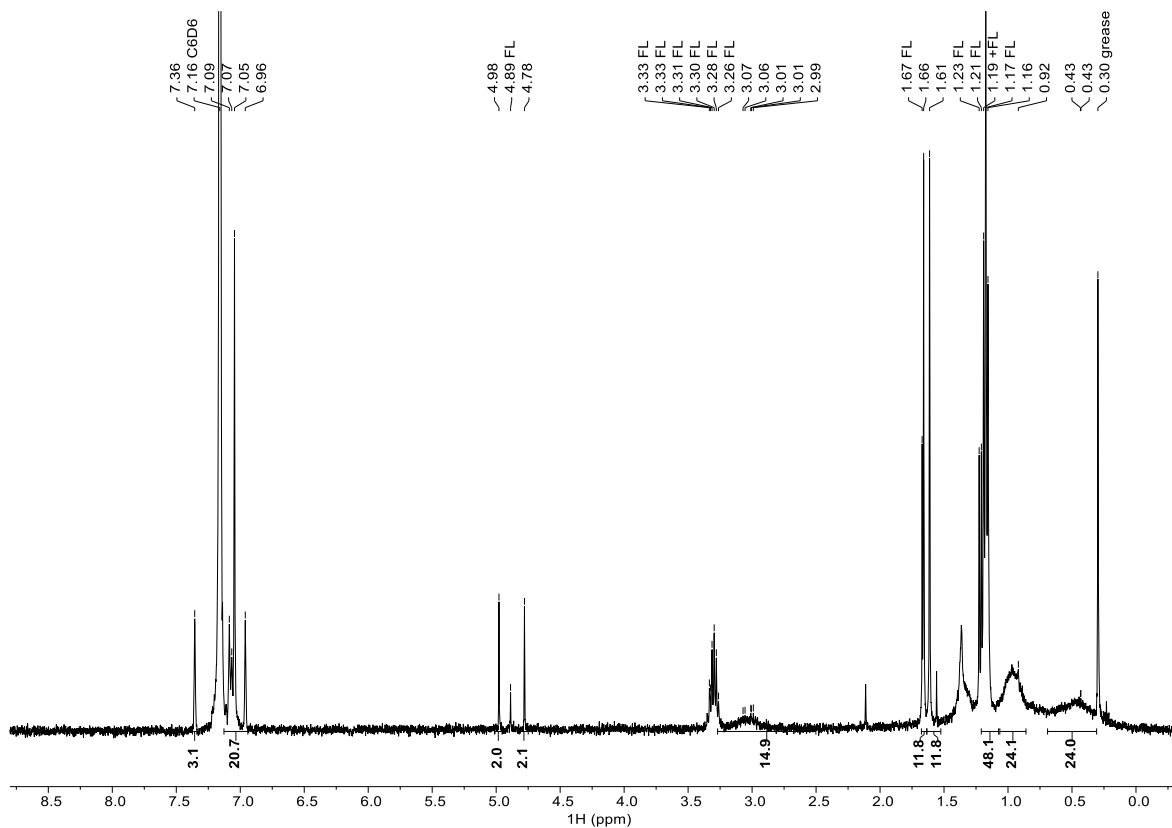

**Figure S1.**  $^1\text{H}$  NMR spectrum (400 MHz, 298 K,  $\text{C}_6\text{D}_6$ ) of **4**.

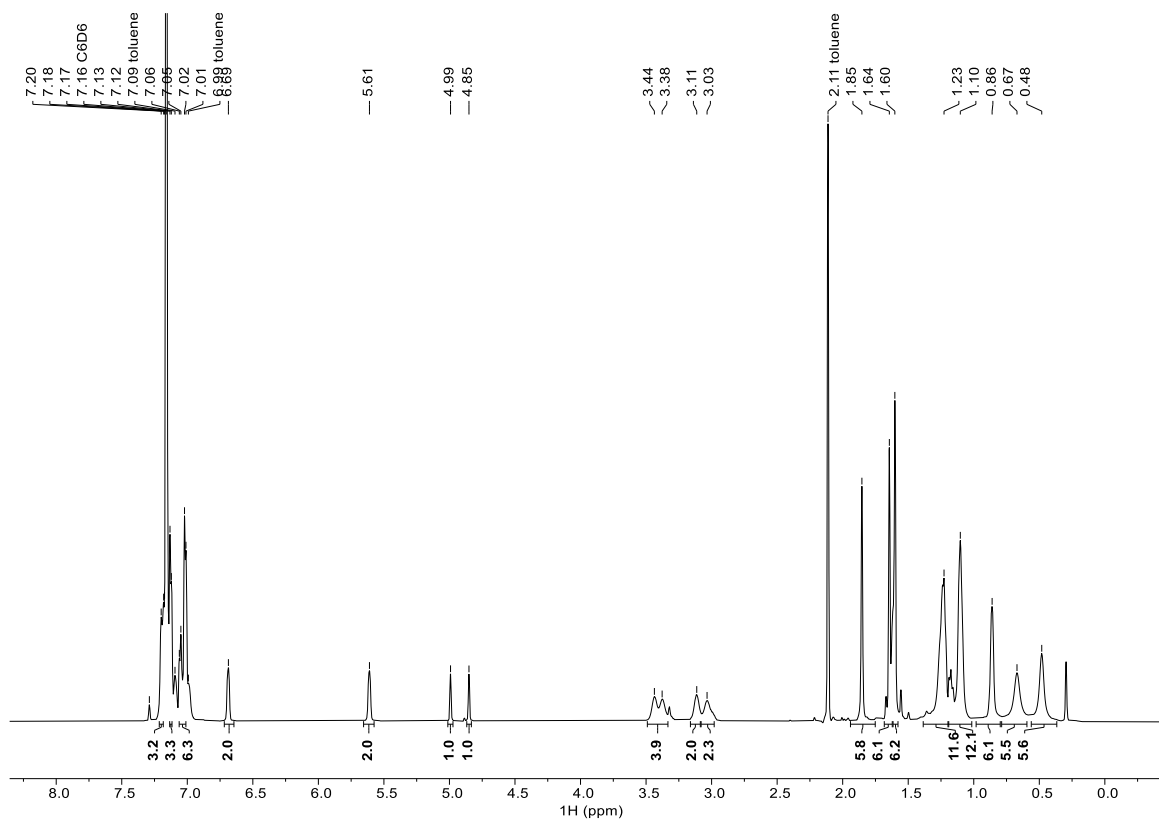

**Figure S2.** <sup>1</sup>H NMR spectrum (400 MHz, 298 K, C<sub>6</sub>D<sub>6</sub>) of **5**.

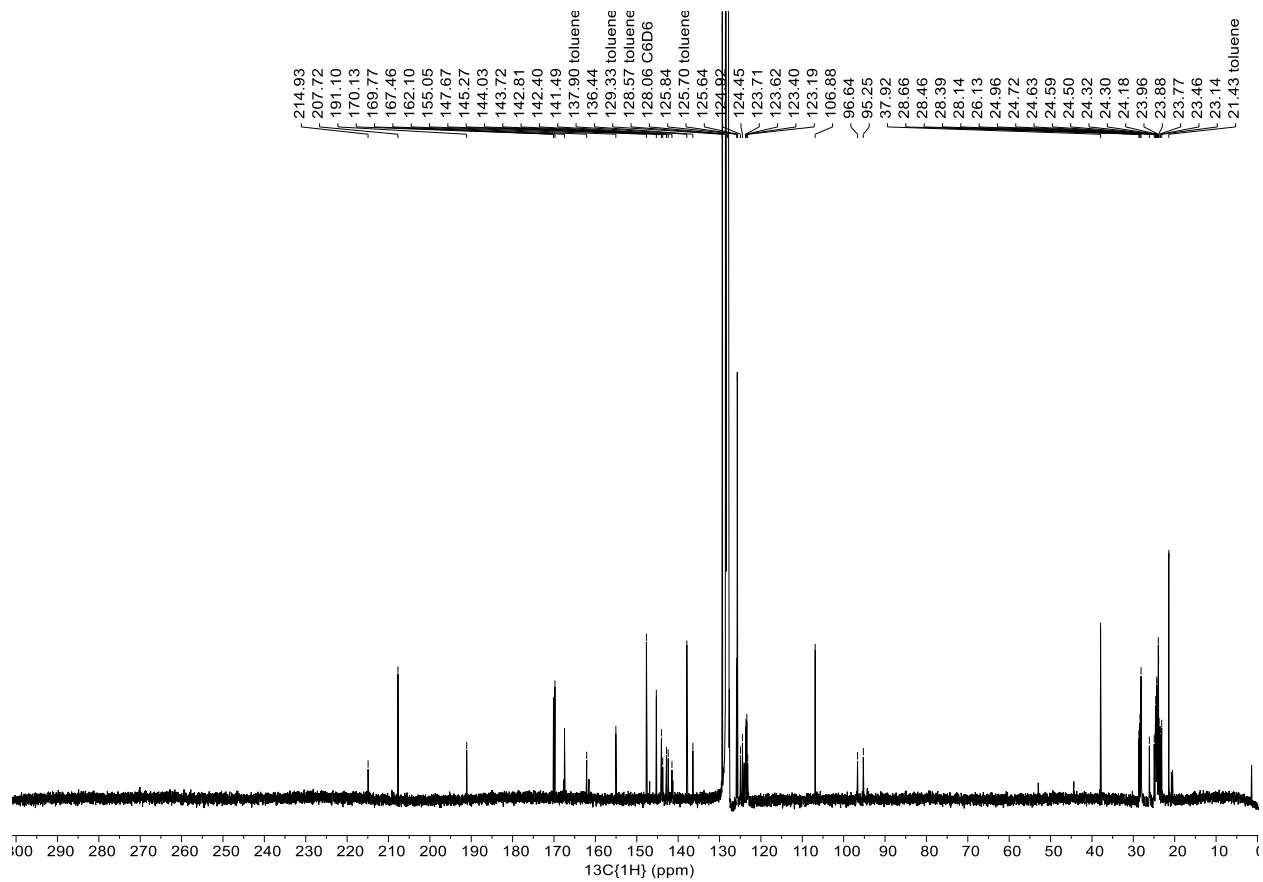

**Figure S3.**  $^{13}\text{C}\{^1\text{H}\}$  NMR spectrum (151 MHz, 298 K, C<sub>6</sub>D<sub>6</sub>) of 5.

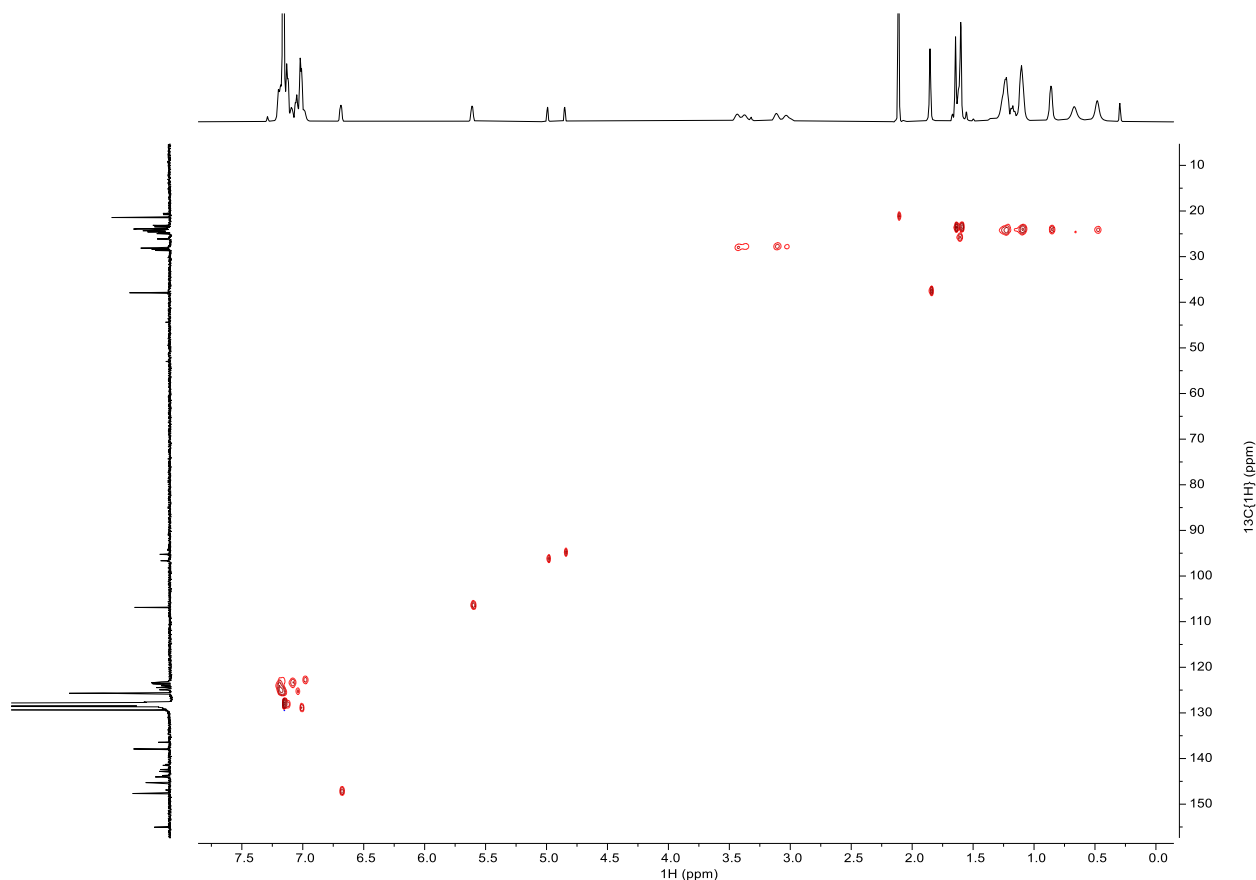

**Figure S4.** HSQC spectrum ( $^1\text{H}$ : 400 MHz;  $^{13}\text{C}$  101 MHz; 298 K,  $\text{C}_6\text{D}_6$ ) of **5**.

**Synthesis of  $[\{(\text{DipNacnac})\text{Mg}\}(\text{C}_4\text{O}_4)\{\mu\text{-Mg}(\text{DipNacnac})\}]_2$  **4** and  $[\{(\text{DipNacnac})\text{Mg}\}\{\mu\text{-}(\text{C}_4\text{O}_4)\text{Mo}(\text{CO})_5\}\{\text{Mg}(\text{TMC})(\text{DipNacnac})\}]$  **6**.**  $[\{(\text{DipNacnac})\text{Mg}\}_2]$  (150 mg, 0.170 mmol) and TMC (21 mg, 0.170 mmol) were dissolved in toluene (50 mL) at  $-78\text{ }^\circ\text{C}$ . This resulted in an immediate solution colour change from yellow to orange red. This mixture was then quickly added to a toluene (1 mL) suspension of  $\text{Mo}(\text{CO})_6$  (45 mg, 0.170 mmol) at room temperature. The reaction vessel placed under vacuum, backfilled with excess CO gas (*ca.* 100 mL), then sealed. The reaction solution was stirred for 12 h at room temperature, yielding a dark red solution. The mixture was then filtered, the filtrate concentrated to *ca.* 3 mL *in vacuo*, then placed at  $-30\text{ }^\circ\text{C}$  for 1 d, after which time colourless crystals of **4** (14 mg, 8 %) had deposited. The mother liquor was filtered and further concentrated to 1 mL. After 2 days bright yellow crystals of **6** had deposited (37 mg, 16 %). Data for **6**:  $165\text{-}168\text{ }^\circ\text{C}$  (decomp.);  $^1\text{H}$  NMR (400 MHz, 298 K,  $\text{C}_6\text{D}_6$ ):  $\delta = 0.75$  (d, 12H,  $\text{CH}(\text{CH}_3)_2$ ), 1.10 (d, 12H,  $\text{CH}(\text{CH}_3)_2$ ), 1.15 (d, 12H,  $\text{CH}(\text{CH}_3)_2$ ), 1.24 (d, 12H,  $\text{CH}(\text{CH}_3)_2$ ),

1.26 (s, 6H, CCH<sub>3</sub>), 1.60 (s, 6H, NCCH<sub>3</sub>), 1.63 (s, 6H, NCCH<sub>3</sub>), 2.22 (s, 6H, NCH<sub>3</sub>), 3.08–3.13 (br., m, 2H, CH(CH<sub>3</sub>)<sub>2</sub>), 3.28–3.33 (br., m, 4H, CH(CH<sub>3</sub>)<sub>2</sub>), 3.41–3.45 (br., m, 2H, CH(CH<sub>3</sub>)<sub>2</sub>), 4.84 (s, 1H, β-CH), 5.01 (s, 1H, β-CH), 6.88–7.13 (m, 12H, Ar-H); N.B. once crystallised, compound **6** has poor solubility in non-coordinating deuterated solvents such as C<sub>6</sub>D<sub>6</sub> and toluene-*d*<sub>8</sub>, which precluded the acquisition of meaningful <sup>13</sup>C{<sup>1</sup>H} NMR spectroscopic data. Further, compound **6** slowly decomposes to protonated ligand, <sup>Dip</sup>NacnacH, when dissolved in *d*<sub>8</sub>-THF; IR ν/cm<sup>-1</sup> (Nujol): 2070 (m), 2039 (m), 1911 (s), 1875 (s), 1619 (s), 1545 (m), 1229 (s), 1175 (m), 1101 (m), 1010 (w), 924 (m), 830 (w), 790 (m); A satisfactory micro-analysis could not be obtained as compound **6** consistently co-crystallizes with small amounts of **4**. The low solubility of both compounds, once crystallised, precluded successful recrystallisations.

**Higher yield synthesis of 4.** [{(<sup>Dip</sup>Nacnac)Mg}<sub>2</sub>] (150 mg, 0.170 mmol) and TMC (21 mg, 0.170 mmol) were dissolved in toluene (5 mL) at -78 °C. This resulted in an immediate solution colour change from yellow to orange red. This mixture was then quickly added to a toluene (1 mL) suspension of Mo(CO)<sub>6</sub> (45 mg, 0.170 mmol) at room temperature. The reaction vessel was then placed under vacuum, backfilled with excess CO gas (*ca.* 100 mL), then sealed. The flask was placed in a preheated oil bath at 80 °C for 14 h, yielding a dark red solution. The mixture was then cooled to room temperature and left for 1 d, after which time colourless crystals of **4** had deposited. These were isolated by filtration (51 mg, 31 %). N.B. A few yellow crystals of *cis*-[Mo(CO)<sub>4</sub>(TMC)<sub>2</sub>] were isolated from the mother liquor, and identified using X-ray crystallography.



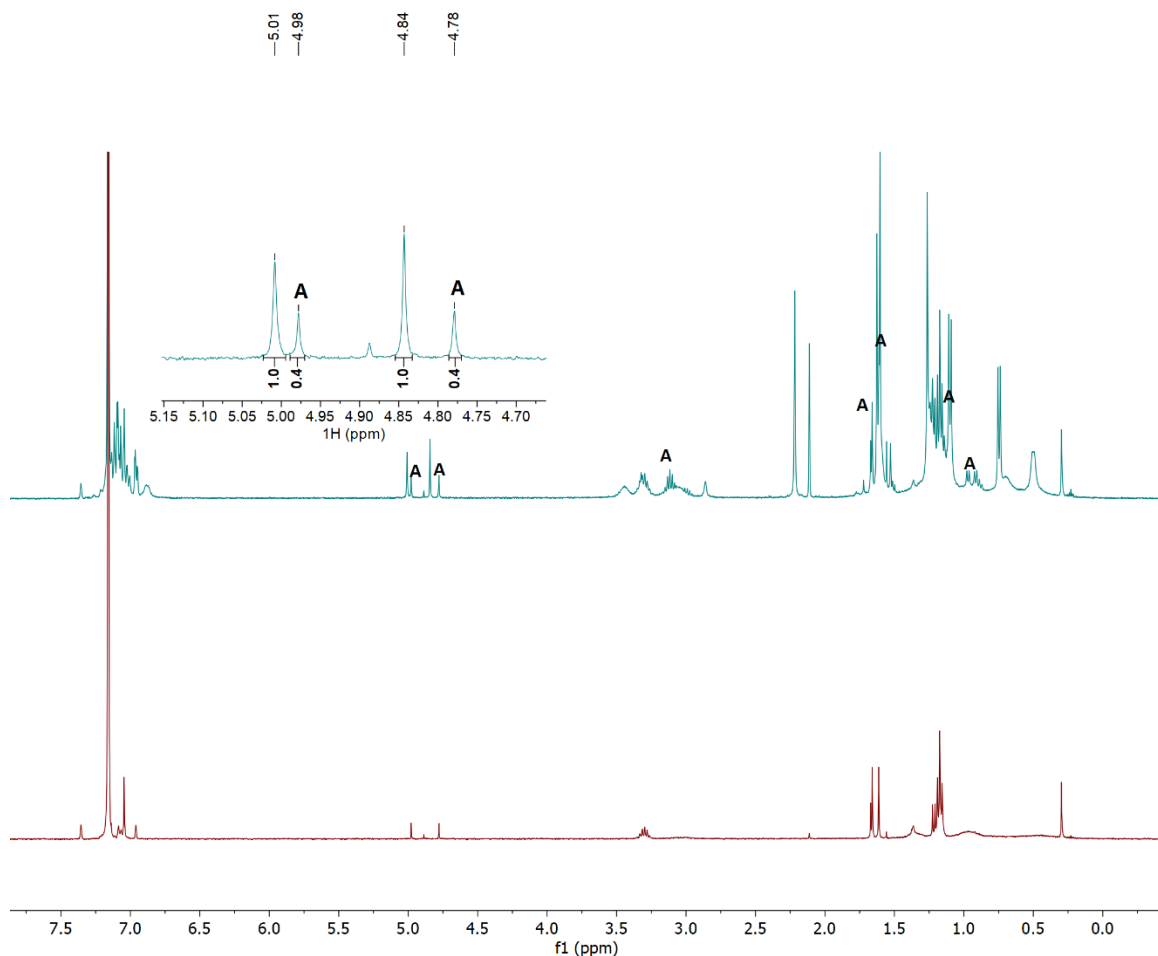

**Figure S5.**  $^1\text{H}$  NMR spectra (400 MHz, 298 K,  $\text{C}_6\text{D}_6$ ) of **4** (below; red color) and a co-crystallised mixture of **4** and **6** (above; green color, peaks for **4** denoted as **A**).

**Synthesis of  $\{(\text{DipNacnac})\text{Mg}\}\{\mu\text{-(C}_4\text{O}_4\text{)Mo(CO)}_5\}\{\text{Mg(THF)(DipNacnac)}\}$  **7**.**  
 $\{(\text{DipNacnac})\text{Mg}\}_2$  (150 mg, 0.170 mmol) was dissolved in 5 mL of benzene followed by the addition of 1 mL of tetrahydrofuran (THF) at room temperature, resulting in an orange-red solution. This mixture was then quickly added to a benzene (1 mL) suspension of  $\text{Mo(CO)}_6$  (45 mg, 0.170 mmol) at room temperature. The reaction vessel was then placed under vacuum, backfilled with excess CO gas (*ca.* 100 mL), then sealed. The solution was stirred for 12 h at room temperature, yielding a dark red solution. The mixture was then filtered, the filtrate concentrated to *ca.* 2 mL *in vacuo*, then placed at 4 °C for 1 d, after which time orange crystals of **7** had deposited. These were washed with cold *n*-hexane, isolated and a second crop obtained from the mother liquor (91 mg, 41 %). M.p. 193-196 °C (decomp.); N.B. accurate integration of the

resonances in the  $^1\text{H}$  NMR spectrum of the compound was not possible due to the broad and often overlapping nature of those resonances. Thus, the integrations are estimated.  $^1\text{H}$  NMR (400 MHz, 298 K,  $\text{C}_6\text{D}_6$ ):  $\delta = 0.45$  (v. br., 6H,  $\text{CH}(\text{CH}_3)_2$ ), 1.02 (v. br., 4H,  $\text{OCH}_2\text{CH}_2$ ), 1.16–1.17 (d, 24H,  $\text{CH}(\text{CH}_3)_2$ ), 1.18–1.19 (d, 12H,  $\text{CH}(\text{CH}_3)_2$ ), 1.21–1.23 (d, 6H,  $\text{CH}(\text{CH}_3)_2$ ), 1.55 (s, 6H,  $\text{NCCH}_3$ ), 1.62 (s, 6H,  $\text{NCCH}_3$ ), 2.96–2.99 (br., m, 4H,  $\text{OCH}_2\text{CH}_2$ ), 3.10–3.16 (br., m, 4H,  $\text{CH}(\text{CH}_3)_2$ ), 3.24–3.33 (br., m, 4H,  $\text{CH}(\text{CH}_3)_2$ ), 4.88 (s, 1H,  $\beta\text{-CH}$ ), 4.91 (s, 1H,  $\beta\text{-CH}$ ), 6.96–7.14 (m, 12H, Ar-H);  $^1\text{H}$  NMR (400 MHz, 298 K, toluene- $d_8$ ):  $\delta = 0.43$  (v. br., 6H,  $\text{CH}(\text{CH}_3)_2$ ), 1.11–1.13 (v. br., 16H,  $\text{OCH}_2\text{CH}_2$  overlapping with  $\text{CH}(\text{CH}_3)_2$ ), 1.16–1.18 (d, 24H,  $\text{CH}(\text{CH}_3)_2$ ), 1.20–1.22 (d, 12H,  $\text{CH}(\text{CH}_3)_2$ ), 1.54 (s, 6H,  $\text{NCCH}_3$ ), 1.59 (s, 6H,  $\text{NCCH}_3$ ), 2.93–2.96 (br., m, 4H,  $\text{OCH}_2\text{CH}_2$ ), 3.06–3.07 (br., m, 4H,  $\text{CH}(\text{CH}_3)_2$ ), 3.14–3.29 (br., m, 4H,  $\text{CH}(\text{CH}_3)_2$ ), 4.82 (s, 1H,  $\beta\text{-CH}$ ), 4.87 (s, 1H,  $\beta\text{-CH}$ ), 6.98–7.10 (m, 12H, Ar-H);  $^{13}\text{C}\{^1\text{H}\}$  NMR (151 MHz,  $\text{C}_6\text{D}_6$ , 298 K):  $\delta = 20.5$  ( $\text{CH}(\text{CH}_3)_2$ ), 23.1, 23.7 ( $\text{NCCH}_3$ ), 23.91, 23.94, 24.41 ( $\text{CH}(\text{CH}_3)_2$ ), 24.45 ( $\text{OCH}_2\text{CH}_2$ ), 28.1, 28.31, 28.32, 28.4, ( $\text{CH}(\text{CH}_3)_2$ ), 69.8 ( $\text{OCH}_2\text{CH}_2$ ), 95.3, 96.7 ( $\beta\text{-CH}$ ), 123.4, 124.0, 125.8, 127.6, 136.4, 143.9, 144.4, 146.8 (Ar-C), 162.3 ( $\text{NCCH}_3$ ), 167.4 ( $\text{C}_2\text{O}_3$ ), 167.6 ( $\text{NCCH}_3$ ), 170.3 (C:C=O), 190.2 ( $\text{C}_2\text{O}_3$ ), 207.5, 214.6 ( $\text{Mo}(\text{CO})_5$ ), N.B. ( $\text{O}=\text{CC}:\text{Mo}(\text{CO})_5$ ) resonance was not observed; N.B. THF- $d_8$  solutions of the compound presented broad and complex  $^1\text{H}$  and  $^{13}\text{C}\{^1\text{H}\}$  NMR spectra, showing the presence of significant quantities of  $^{\text{Dip}}\text{NacnacH}$ , suggesting the compound slowly decomposes in THF- $d_8$ ; IR  $\nu/\text{cm}^{-1}$  (Nujol): 2075 (s), 2046 (s), 1979 (s), 1919 (s), 1887 (s), 1626 (s), 1547 (m), 1523 (m), 1263 (m), 1176 (m), 1102 (m), 1021 (w), 934 (m), 797 (s); anal. calc. for  $\text{C}_{71}\text{H}_{91}\text{Mg}_2\text{MoN}_4\text{O}_{10}$ : C 65.34 %, H 7.03 %, N 4.29 %; found: C 65.77 %, H 7.36 %, N 4.41 %.

**Synthesis of 7 using  $^{13}\text{CO}$ .** [ $\{^{\text{Dip}}\text{Nacnac}\text{Mg}\}_2$ ] (80 mg, 0.091 mmol) was dissolved in 3 mL of benzene at room temperature, followed by the addition of 0.5 mL of THF, resulting in an orange-red solution. This mixture was then quickly added to a benzene (0.5 mL) suspension of  $\text{Mo}(\text{CO})_6$  (24 mg, 0.091 mmol) at room temperature. The reaction vessel was then placed under vacuum, backfilled with excess  $^{13}\text{CO}$  gas (ca. 20 mL), then sealed. The resultant solution was stirred for 12 h at room temperature, yielding a dark red solution. The mixture was then filtered, the filtrate concentrated to ca. 1 mL *in vacuo*, then placed at 4 °C for 1 d, after which time orange crystals of **7** had deposited (30 mg, 25 %).  $^{13}\text{CO}$  enriched  $^{13}\text{C}\{^1\text{H}\}$  NMR (151 MHz,  $\text{C}_6\text{D}_6$ , 298 K):  $\delta = 167.4$  (d,  $J = 61$  Hz,  $\text{C}_2\text{O}_3$ ), 170.3 (s, C:C=O), 190.2 (d,  $J = 61$  Hz,  $\text{C}_2\text{O}_3$ ), 207.5, 214.6 ( $\text{Mo}(\text{CO})_5$ ), N.B. ( $\text{O}=\text{CC}:(\text{Mo}(\text{CO})_5)$ ) resonance was not observed.

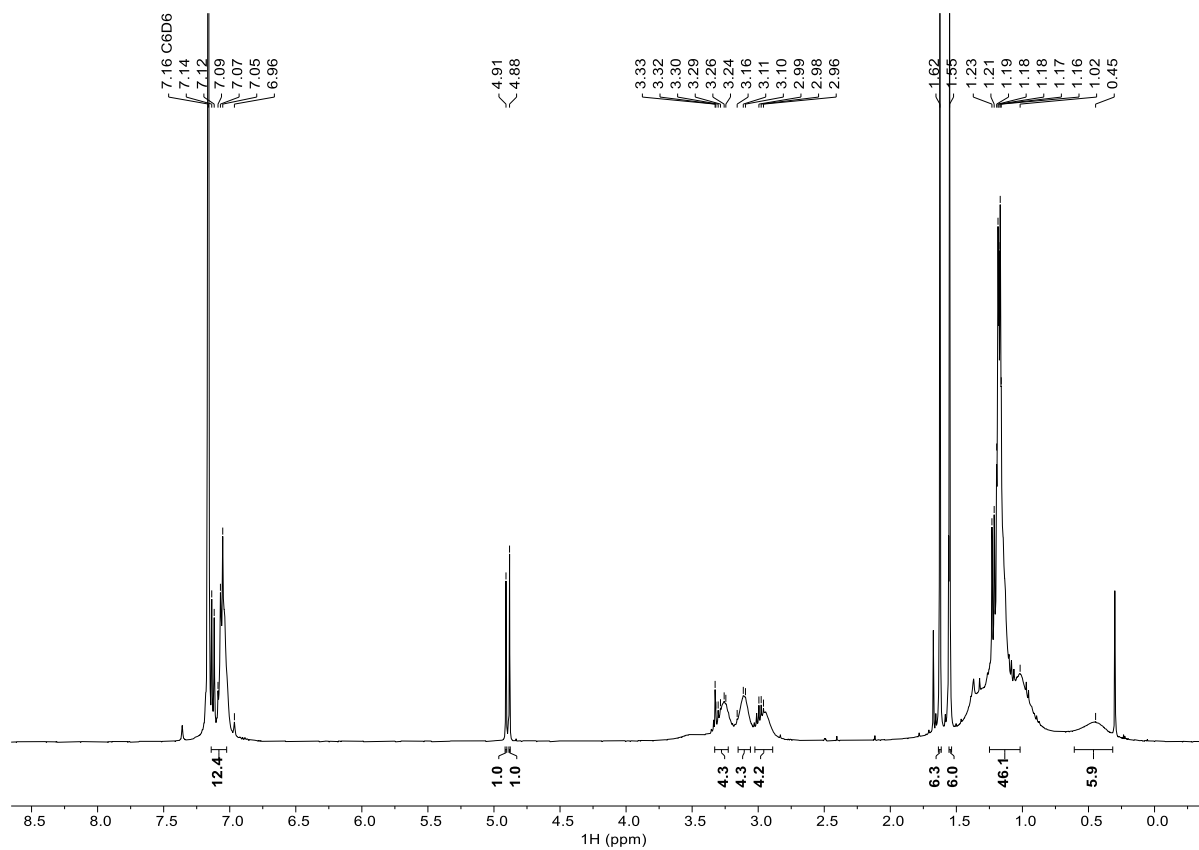

**Figure S6.**  $^1\text{H}$  NMR spectrum (400 MHz, 298 K,  $\text{C}_6\text{D}_6$ ) of **7**.

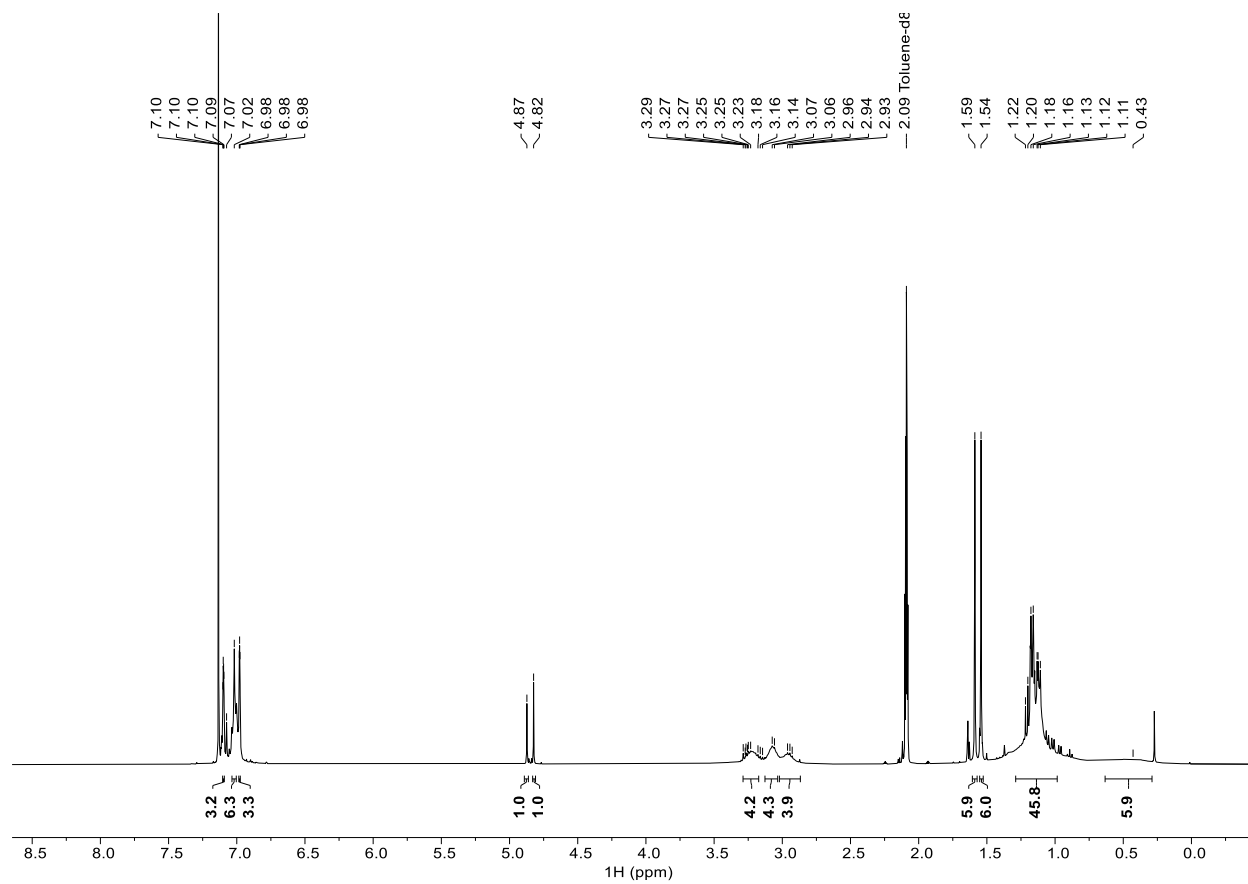

**Figure S7.**  $^1\text{H}$  NMR spectrum (400 MHz, 298 K, toluene- $d_8$ ) of **7**.

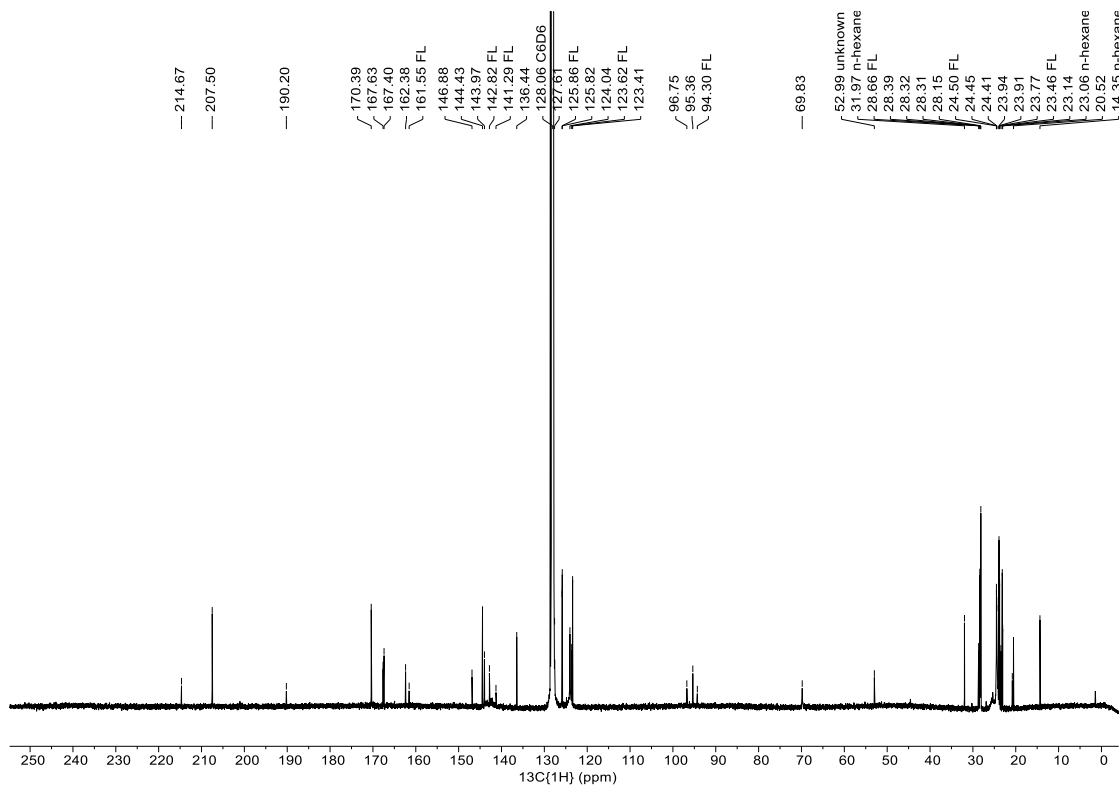

**Figure S8.**  $^{13}\text{C}\{^1\text{H}\}$  NMR spectrum (151 MHz, 298 K,  $\text{C}_6\text{D}_6$ ) of **7**, (FL =  $\text{Dip}^{\text{NacnacH}}$ ).

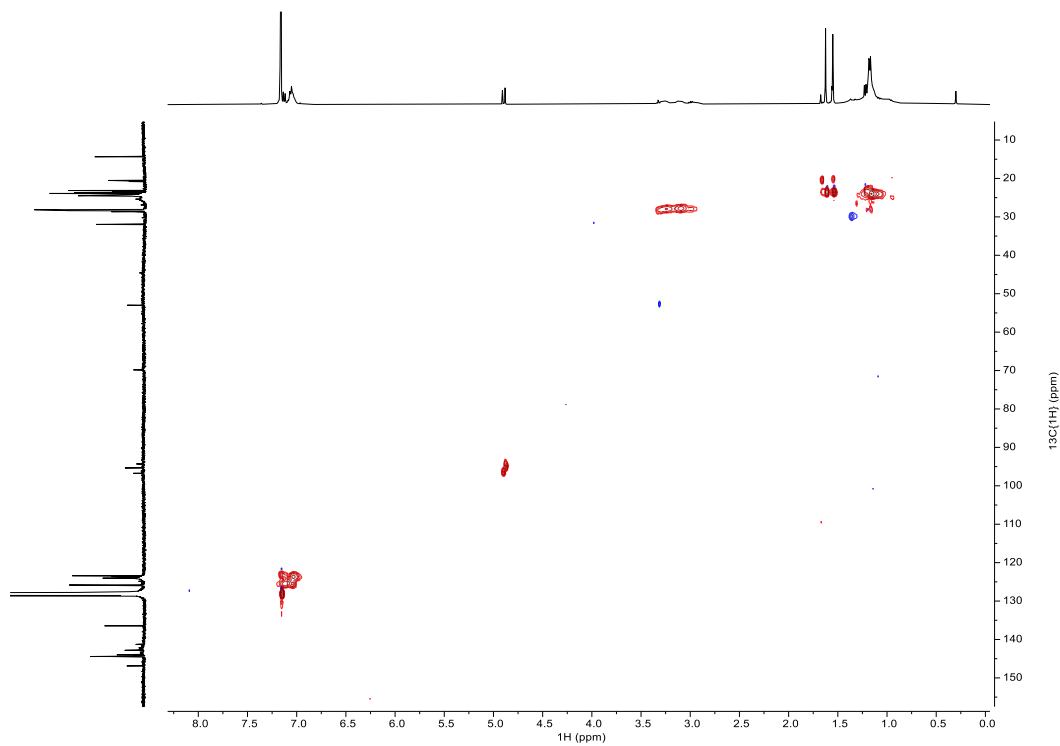

**Figure S9.** HSQC spectrum ( $^1\text{H}$ : 400 MHz;  $^{13}\text{C}$  101 MHz; 298 K,  $\text{C}_6\text{D}_6$ ) of **7**.

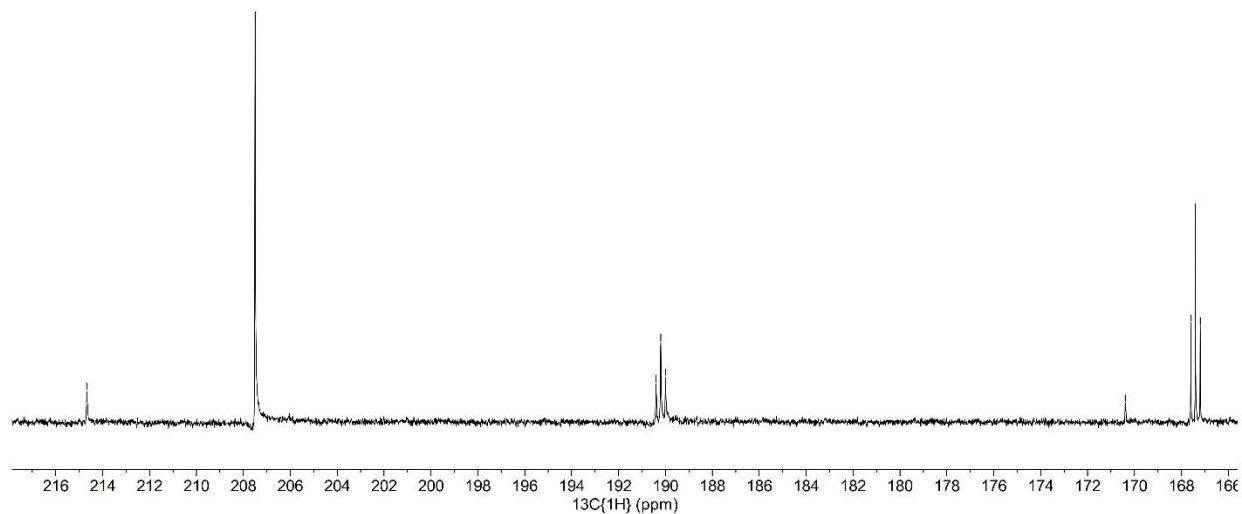

**Figure S10.** Low field region of the  $^{13}\text{CO}$  enriched  $^{13}\text{C}\{^1\text{H}\}$  NMR spectrum (151 MHz, 298 K,  $\text{C}_6\text{D}_6$ ) of **7** after 254 scans. N.B. The apparent triplet resonances were confirmed to be doublet resonances superimposed on singlet resonances, using 1D- and 2D-INADEQUATE NMR experiments.

**Synthesis of  $\{[(\text{Priso})(\text{THF})\text{Mg}]\{\text{C}_4\text{O}_4\}\{\mu\text{-Mg}(\text{THF})(\text{Priso})\}\}_2$  **8**.**  $\{[(\text{Priso})\text{Mg}]_2$  (150 mg, 0.154 mmol) was dissolved in 3 mL of benzene, followed by the addition of THF (0.2 mL), yielding a pale-yellow solution, which was quickly transferred into a 1 mL benzene suspension of  $\text{Mo}(\text{CO})_6$  (41 mg, 0.154 mmol). The head space above the mixture was evacuated, and backfilled with excess CO gas (*ca.* 100 mL), then the reaction flask sealed. The mixture was then stirred for 14 h, at 80 °C, yielding a dark green solution. The reaction mixture was then kept at room temperature overnight, after which time colorless crystals of **8**, had formed (32 mg, 17 %); M.p. = 151-156 °C;  $^1\text{H}$  NMR (600 MHz,  $\text{C}_6\text{D}_6$ , 298 K)  $\delta$  = 0.95–0.97 (dd,  $J$  = 7.1, 5.0 Hz, 48H,  $\text{CH}(\text{CH}_3)_2$ ), 1.08 (d,  $J$  = 6.7 Hz, 24H,  $\text{NCH}(\text{CH}_3)_2$ ), 1.18–1.23 (v. br., 16H,  $\text{OCH}_2\text{CH}_2$ , overlapping with FL), 1.38 (d, 24H,  $J$  = 6.8 Hz,  $\text{NCH}(\text{CH}_3)_2$ ), 1.46–1.48 (dd,  $J$  = 7.1, 5.0 Hz, 48H,  $\text{CH}(\text{CH}_3)_2$ ), 3.44–3.51 (br. m, 16H,  $\text{OCH}_2\text{CH}_2$ , overlapping with FL), 3.84–3.89 (m, 8H,  $\text{CH}(\text{CH}_3)_2$ ), 3.92–3.97 (m, 8H,  $\text{CH}(\text{CH}_3)_2$ ), 4.16–4.21 (m, 4H,  $\text{NCH}(\text{CH}_3)_2$ ), 4.23–4.26 (m, 4H,  $\text{NCH}(\text{CH}_3)_2$ ), 6.99–7.22 (m, 24H, Ar-H);  $^{13}\text{C}\{^1\text{H}\}$  NMR (151 MHz,  $\text{C}_6\text{D}_6$ , 298 K)  $\delta$  = 21.8, 22.0 ( $\text{NCH}(\text{CH}_3)_2$ ), 23.51, 23.59, 24.4, 25.1, 25.3, 25.8 ( $\text{CH}(\text{CH}_3)_2$ ), 28.1, 28.2, 28.4, 30.2 ( $\text{CH}(\text{CH}_3)_2$ ), 49.8, 50.0 ( $\text{NCH}(\text{CH}_3)_2$ ), 123.1, 123.3, 123.6, 123.9, 127.90, 127.98, 128.2, 128.3, 128.5, 142.9, 143.7, 145.3 (Ar-C), 166.7, 166.8

(CN<sub>3</sub>), THF and (C<sub>4</sub>O<sub>4</sub>)<sup>2-</sup> resonances were not observed. N.B. Compound **8** has poor solubility in C<sub>6</sub>D<sub>6</sub> and toluene-*d*<sub>8</sub>. IR  $\nu/\text{cm}^{-1}$  (Nujol): 1625 (s), 1562 (s), 1275 (s), 1238 (s), 1204 (s), 1176 (s), 1124 (m), 1027 (m), 934 (m), 919 (m), 871 (m), 801 (s), 755 (s), 726 (s); a satisfactory micro-analysis could not be obtained as the compound consistently co-crystallizes with small amounts of PrisoH (FL), which could not be removed after repeated recrystallizations.

**Synthesis of 8 using <sup>13</sup>CO.** [{(Priso)Mg}<sub>2</sub>] (10 mg, 0.010 mmol) and Mo(CO)<sub>6</sub> (3 mg, 0.010 mmol) were dissolved in 0.4 mL of C<sub>6</sub>D<sub>6</sub>, followed by the addition of THF-*d*<sub>8</sub> (0.1 mL), yielding a pale-yellow solution. The head space above the mixture was evacuated and backfilled with excess <sup>13</sup>CO gas (*ca.* 20 mL), and the reaction flask sealed. The mixture was placed in an oil bath at 80 °C for 14 h, yielding a dark green solution. A <sup>13</sup>C{<sup>1</sup>H} NMR spectrum of an aliquot of the reaction mixture was then taken. <sup>13</sup>CO enriched <sup>13</sup>C{<sup>1</sup>H} NMR (151 MHz, C<sub>6</sub>D<sub>6</sub>, 298 K):  $\delta = 231.4$  (s, C<sub>4</sub>O<sub>4</sub>), 237.7 (s, C<sub>4</sub>O<sub>4</sub>).

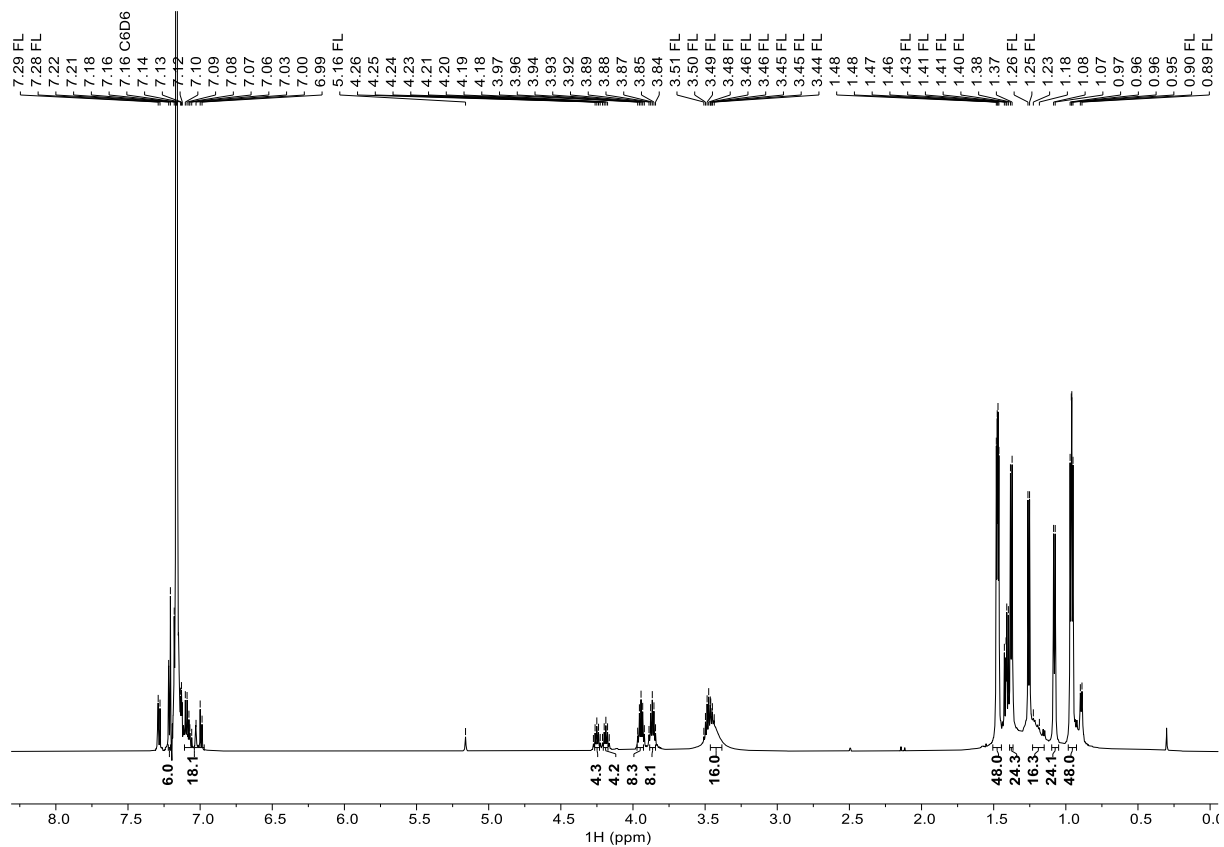

**Figure S11.**  $^1\text{H}$  NMR spectrum (600 MHz, 298 K,  $\text{C}_6\text{D}_6$ ) of **8**, (FL = PrisoH).



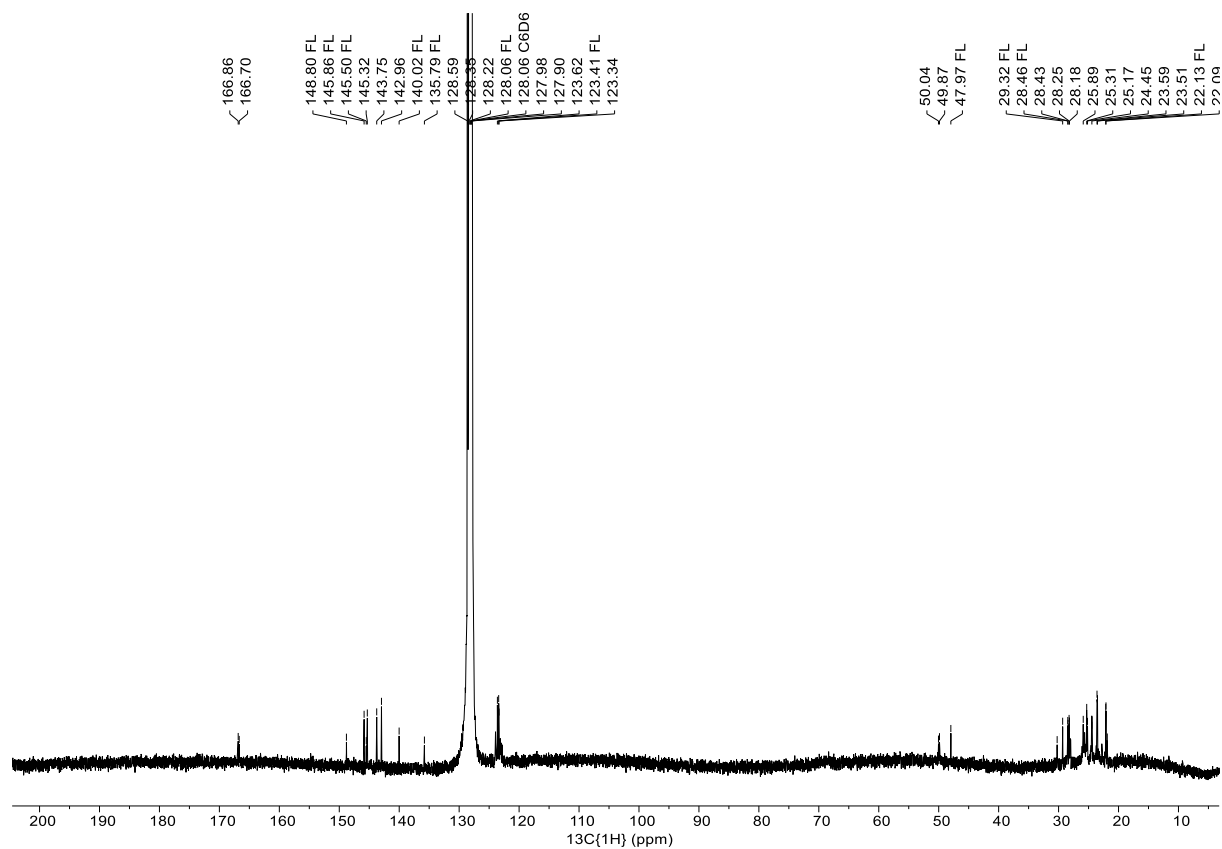

**Figure S12.**  $^{13}\text{C}\{^1\text{H}\}$  NMR spectrum (151 MHz, 298 K,  $\text{C}_6\text{D}_6$ ) of **8**, (FL = PrisoH).

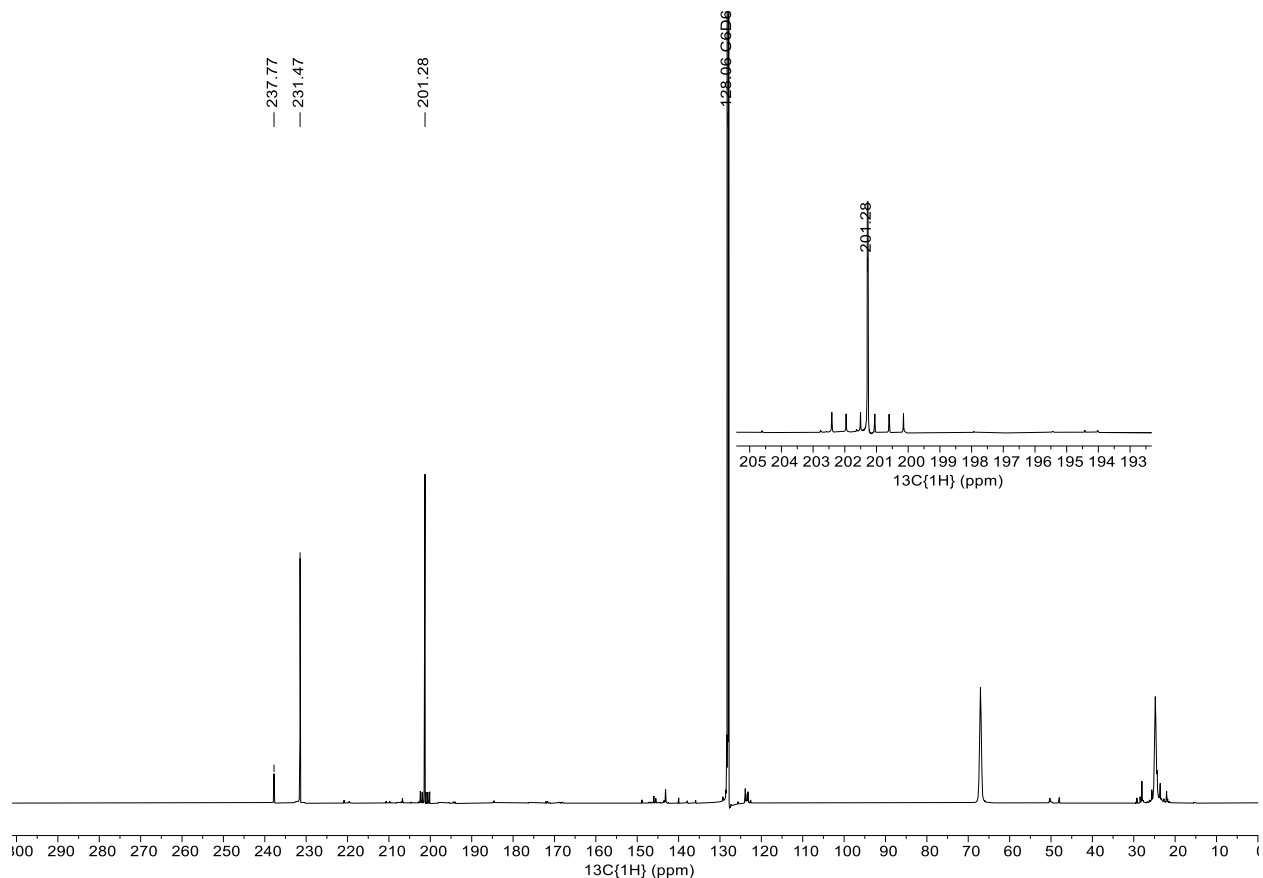

**Figure S13.**  $^{13}\text{C}\{^1\text{H}\}$  NMR spectrum (151 MHz, 298 K,  $\text{C}_6\text{D}_6$ ) of an aliquot of the  $^{13}\text{CO}$  enriched reaction mixture that gave **8** (254 scans). The signal at  $\delta$  201 ppm is associated with  $\text{Mo}(\text{CO})_6$  in the mixture.

#### Synthesis of *cis*-[Mo(CO)<sub>4</sub>(TMC)<sub>2</sub>]

TMC (188 mg, 1.52 mmol) and  $\text{Mo}(\text{CO})_6$  (200 mg, 0.757 mmol) were suspended in 10 mL of toluene at room temperature, then the reaction mixture placed in an oil bath at 80 °C overnight. After this time, a pale yellow solid precipitated. This was isolated and washed with hexane, then dried under vacuum to give the title compound (242 mg, 70 %). N.B. the compound has poor solubility in aromatic solvents such as  $\text{C}_6\text{D}_6$  and toluene-*d*<sub>8</sub>. M.p 141-144 °C;  $^1\text{H}$  NMR (400 MHz,  $\text{C}_6\text{D}_6$ , 298 K):  $\delta$  = 1.33 (s, 12H,  $\text{CCH}_3$ ), 3.26 (s, 12H,  $\text{NCH}_3$ );  $^1\text{H}$  NMR (400 MHz,  $\text{CDCl}_3$ , 298 K):  $\delta$  = 2.06 (s, 12H,  $\text{CCH}_3$ ), 3.51 (s, 12H,  $\text{NCH}_3$ );  $^{13}\text{C}\{^1\text{H}\}$  NMR (101 MHz,  $\text{CDCl}_3$ , 298 K):  $\delta$  = 9.8 ( $\text{CCH}_3$ ), 36.0 ( $\text{NCH}_3$ ), 124.7 ( $\text{CCH}_3$ ), 193.1, 211.6 ( $\text{MoC}$ ); IR  $\nu/\text{cm}^{-1}$  (Nujol): 1988 (s), 1914

(s), 1850 (s), 1798 (s), 1069 (m), 844 (m), 670 (m); anal. calc. for  $C_{18}H_{24}MoN_4O_4$ : C 47.37 %, H 5.30 %, N 12.28 %; found: C 47.28 %, H 5.50 %, N 12.03 %.

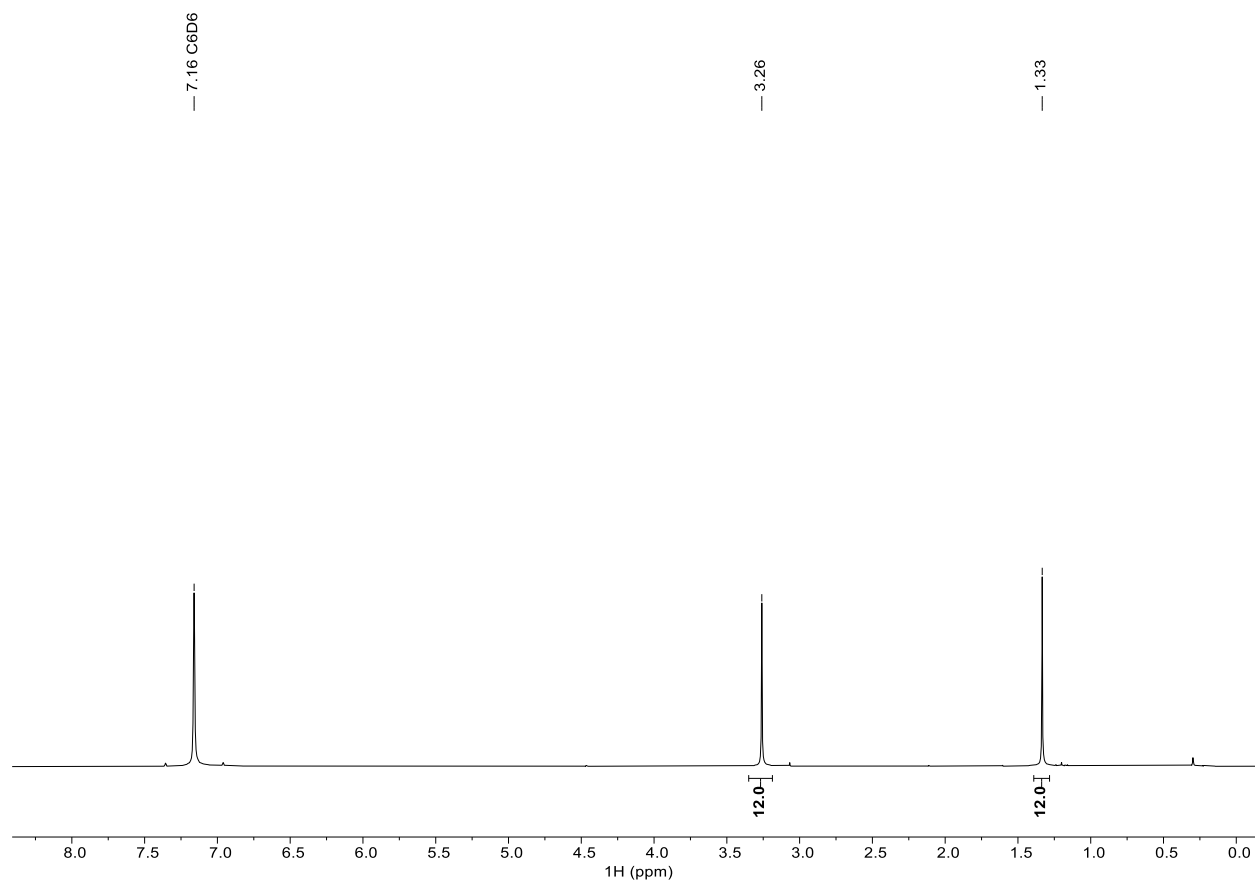

**Figure S14.**  $^1H$  NMR spectrum (400 MHz, 298 K,  $C_6D_6$ ) of *cis*- $[Mo(CO)_4(TMC)_2]$ .

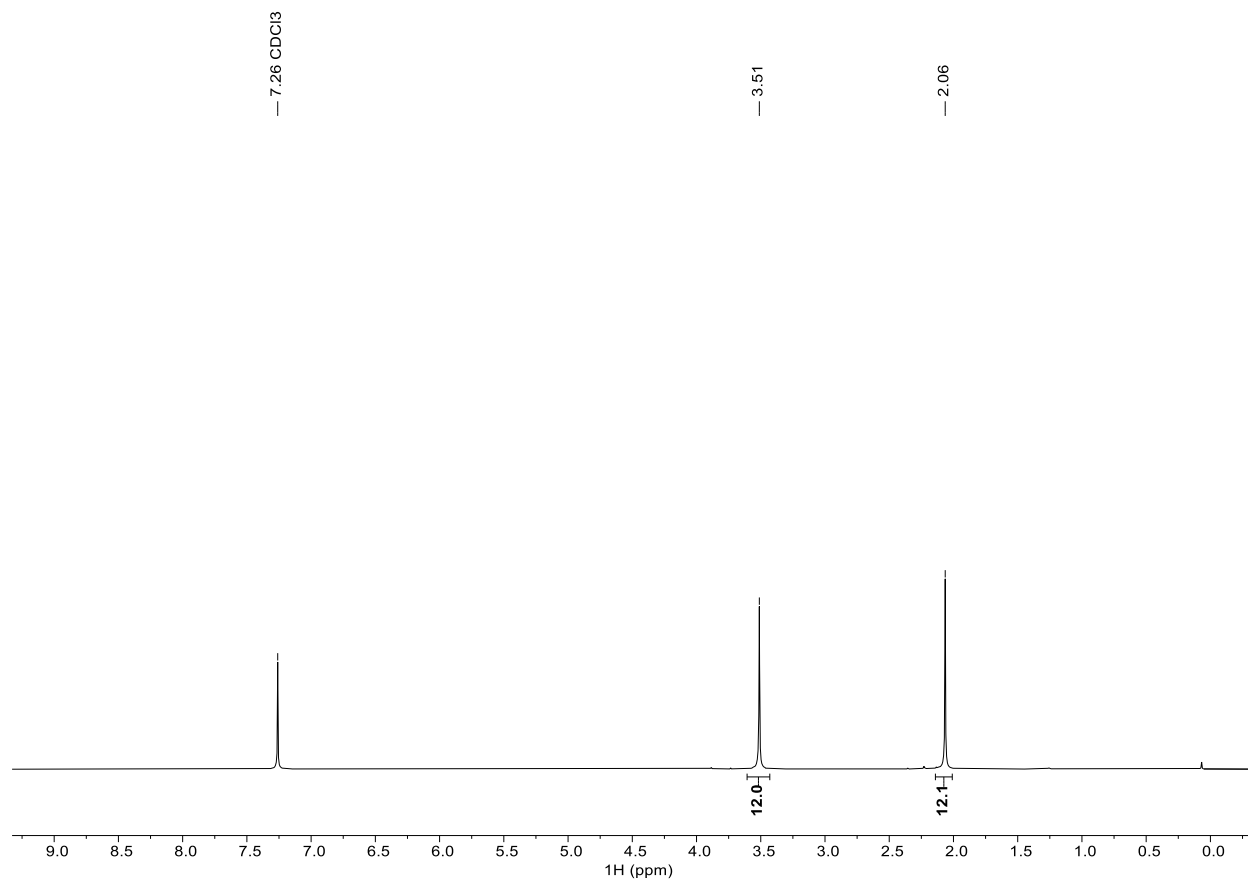

**Figure S15.**  $^1\text{H}$  NMR spectrum (400 MHz, 298 K,  $\text{CDCl}_3$ ) of *cis*- $[\text{Mo}(\text{CO})_4(\text{TMC})_2]$ .

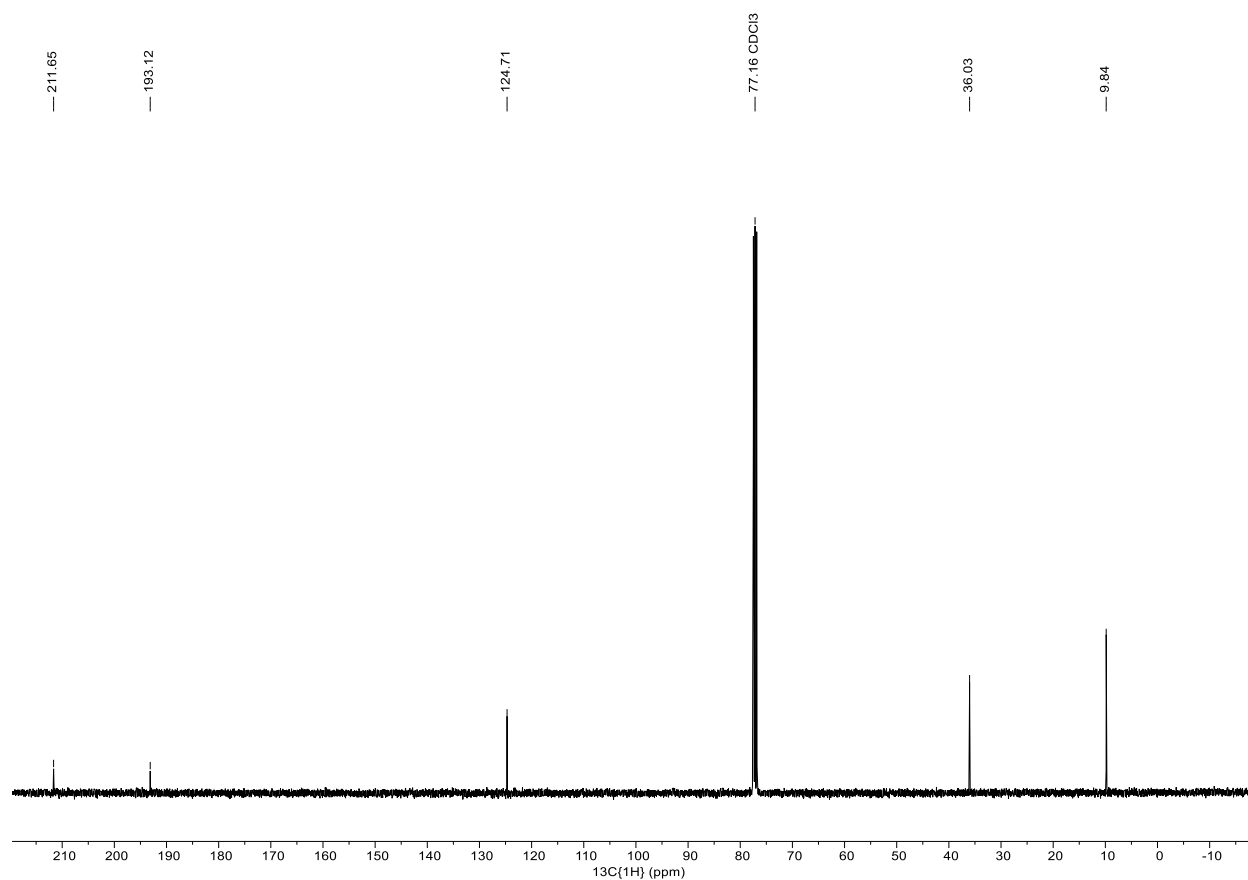

**Figure S16.**  $^{13}\text{C}\{^1\text{H}\}$  NMR spectrum (101 MHz, 298 K,  $\text{CDCl}_3$ ) of *cis*- $[\text{Mo}(\text{CO})_4(\text{TMC})_2]$ .

## 2. X-Ray Crystallographic Studies

Crystals suitable for X-ray structural determination were mounted in silicone oil. Crystallographic measurements were made using either a Rigaku Xtalab Synergy Dualflex diffractometer with a graphite monochromator with Mo  $K\alpha$  radiation ( $\lambda = 0.71073 \text{ \AA}$ ) or Cu  $K\alpha$  radiation ( $1.54180 \text{ \AA}$ ); or the MX1 beamline of the Australian Synchrotron ( $\lambda = 0.71090 \text{ \AA}$ ). The software package BlueIce<sup>4</sup> was used for synchrotron data acquisition, while the program XDS<sup>5</sup> was employed for synchrotron data reduction. All structures were solved by direct methods and refined on  $F^2$  by full matrix least squares (SHELX-16<sup>6</sup>) using all unique data. Hydrogen atoms are typically included in calculated positions (riding model). Crystal data, details of data collections and refinements for all structures can be found in their CIF files and are summarized in Table S1.

**Table S1.** Crystal data for compounds **4-8**, *cis*-[Mo(CO)<sub>4</sub>(DMAP)] **1S** and *cis*-[Mo(CO)<sub>4</sub>(TMC)] **2S**.

|                                            | <b>4</b> •(benzene)                                                             | <b>5</b> •(toluene) <sub>2</sub>                                                 | <b>6</b> •(toluene)                                                              | <b>7</b> •(benzene) <sub>1.5</sub>                                                |
|--------------------------------------------|---------------------------------------------------------------------------------|----------------------------------------------------------------------------------|----------------------------------------------------------------------------------|-----------------------------------------------------------------------------------|
| empirical formula                          | C <sub>130</sub> H <sub>170</sub> Mg <sub>4</sub> N <sub>8</sub> O <sub>8</sub> | C <sub>88</sub> H <sub>108</sub> Mg <sub>2</sub> MoN <sub>6</sub> O <sub>9</sub> | C <sub>81</sub> H <sub>102</sub> Mg <sub>2</sub> MoN <sub>6</sub> O <sub>9</sub> | C <sub>89</sub> H <sub>108</sub> Mg <sub>2</sub> MoN <sub>4</sub> O <sub>10</sub> |
| formula weight                             | 2069.97                                                                         | 1538.36                                                                          | 1448.24                                                                          | 1538.35                                                                           |
| crystal system                             | triclinic                                                                       | monoclinic                                                                       | monoclinic                                                                       | monoclinic                                                                        |
| space group                                | <i>P</i> -1                                                                     | <i>P</i> 2 <sub>1</sub> / <i>n</i>                                               | <i>P</i> 2 <sub>1</sub> / <i>n</i>                                               | <i>P</i> 2 <sub>1</sub> / <i>m</i>                                                |
| a (Å)                                      | 12.5268(3)                                                                      | 12.471(3)                                                                        | 13.040(3)                                                                        | 12.6201(3)                                                                        |
| b (Å)                                      | 15.3082(4)                                                                      | 23.565(5)                                                                        | 48.660(10)                                                                       | 23.4471(5)                                                                        |
| c (Å)                                      | 17.5288(4)                                                                      | 29.107(6)                                                                        | 13.390(3)                                                                        | 14.4084(3)                                                                        |
| α (°)                                      | 83.714(2)                                                                       | 90                                                                               | 90                                                                               | 90                                                                                |
| β (°)                                      | 89.854(2)                                                                       | 91.73(3)                                                                         | 113.04(3)                                                                        | 96.396(2)                                                                         |
| γ (°)                                      | 65.992(3)                                                                       | 90                                                                               | 90                                                                               | 90                                                                                |
| V (Å <sup>3</sup> )                        | 3048.85(14)                                                                     | 8550(3)                                                                          | 7819(3)                                                                          | 4236.98(16)                                                                       |
| Z                                          | 1                                                                               | 4                                                                                | 4                                                                                | 2                                                                                 |
| T (K)                                      | 123(2)                                                                          | 100(2)                                                                           | 100(2)                                                                           | 123(2)                                                                            |
| ρ <sub>caled</sub> (g·cm <sup>3</sup> )    | 1.127                                                                           | 1.195                                                                            | 1.230                                                                            | 1.206                                                                             |
| μ (mm <sup>-1</sup> )                      | 0.723                                                                           | 0.225                                                                            | 0.242                                                                            | 0.228                                                                             |
| F(000)                                     | 1118                                                                            | 3264                                                                             | 3072                                                                             | 1632                                                                              |
| reflns collected                           | 43967                                                                           | 102482                                                                           | 542177                                                                           | 42901                                                                             |
| unique reflns                              | 11073                                                                           | 16565                                                                            | 15187                                                                            | 8083                                                                              |
| R <sub>int</sub>                           | 0.0797                                                                          | 0.0259                                                                           | 0.0869                                                                           | 0.0424                                                                            |
| R1 [I > 2σ(I)]                             | 0.0792                                                                          | 0.0388                                                                           | 0.0451                                                                           | 0.0321                                                                            |
| wR2 (all data)                             | 0.2118                                                                          | 0.1113                                                                           | 0.1256                                                                           | 0.0839                                                                            |
| largest peak and hole (e·Å <sup>-3</sup> ) | 0.655, -0.281                                                                   | 1.933, -0.561                                                                    | 0.553, -0.742                                                                    | 0.538, -0.541                                                                     |
| CCDC no.                                   | 2250280                                                                         | 2250281                                                                          | 2250283                                                                          | 2250278                                                                           |

**Table S1 (contd.).** Crystal data for compounds **4-8**, *cis*-[Mo(CO)<sub>4</sub>(DMAP)] **1S** and *cis*-[Mo(CO)<sub>4</sub>(TMC)] **2S**.

|                                            | <b>8</b> ·(benzene) <sub>5</sub>                                                  | <b>1S</b>                                                       | <b>2S</b>                                                       |
|--------------------------------------------|-----------------------------------------------------------------------------------|-----------------------------------------------------------------|-----------------------------------------------------------------|
| empirical formula                          | C <sub>178</sub> H <sub>254</sub> Mg <sub>4</sub> N <sub>12</sub> O <sub>12</sub> | C <sub>18</sub> H <sub>20</sub> MoN <sub>4</sub> O <sub>4</sub> | C <sub>18</sub> H <sub>24</sub> MoN <sub>4</sub> O <sub>4</sub> |
| formula weight                             | 2851.16                                                                           | 452.32                                                          | 456.35                                                          |
| crystal system                             | triclinic                                                                         | monoclinic                                                      | monoclinic                                                      |
| space group                                | <i>P</i> -1                                                                       | <i>C</i> 2/ <i>c</i>                                            | <i>P</i> 2 <sub>1</sub> / <i>c</i>                              |
| a (Å)                                      | 12.180(2)                                                                         | 29.705(6)                                                       | 16.1752(2)                                                      |
| b (Å)                                      | 17.740(4)                                                                         | 9.751(2)                                                        | 8.34020(10)                                                     |
| c (Å)                                      | 19.440(4)                                                                         | 14.098(3)                                                       | 16.1713(2)                                                      |
| α (°)                                      | 87.54(3)                                                                          | 90                                                              | 90                                                              |
| β (°)                                      | 87.79(3)                                                                          | 105.68(3)                                                       | 112.5330(10)                                                    |
| γ (°)                                      | 87.49(3)                                                                          | 90                                                              | 90                                                              |
| V (Å <sup>3</sup> )                        | 4189.7(14)                                                                        | 3931.5(15)                                                      | 2015.03(4)                                                      |
| Z                                          | 1                                                                                 | 8                                                               | 4                                                               |
| T (K)                                      | 100(2)                                                                            | 123(2)                                                          | 123(2)                                                          |
| ρ <sub>caled</sub> (g·cm <sup>3</sup> )    | 1.130                                                                             | 1.528                                                           | 1.504                                                           |
| μ (mm <sup>-1</sup> )                      | 0.083                                                                             | 0.698                                                           | 5.586                                                           |
| F(000)                                     | 1550                                                                              | 1840                                                            | 936                                                             |
| reflns collected                           | 101217                                                                            | 19999                                                           | 20009                                                           |
| unique reflns                              | 15340                                                                             | 3646                                                            | 3653                                                            |
| R <sub>int</sub>                           | 0.0360                                                                            | 0.0389                                                          | 0.0391                                                          |
| R1 [I > 2σ(I)]                             | 0.0437                                                                            | 0.0280                                                          | 0.0238                                                          |
| wR2 (all data)                             | 0.1182                                                                            | 0.0730                                                          | 0.0640                                                          |
| largest peak and hole (e·Å <sup>-3</sup> ) | 0.729, -0.392                                                                     | 0.543, -0.545                                                   | 0.367, -0.758                                                   |
| CCDC no.                                   | 2250282                                                                           | 2250279                                                         | 2250277                                                         |

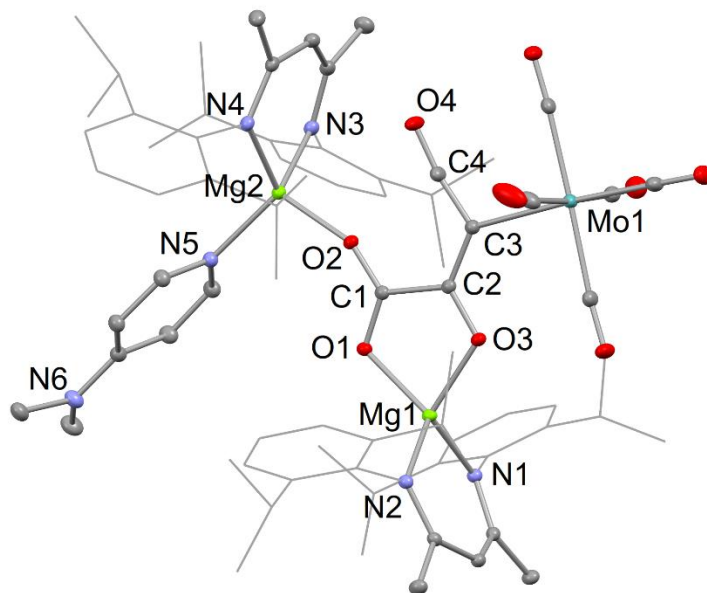

**Figure S17.** Molecular structure of **5** (25% thermal ellipsoids; hydrogen atoms omitted; Dip substituents shown as wire-frame for sake of clarity). Selected bond lengths (Å) and angles (°): Mo(1)-C(3) 2.3222(19), Mg(1)-O(3) 1.9707(14), Mg(1)-O(1) 1.9957(14), O(1)-C(1) 1.258(2), C(1)-O(2) 1.250(2), C(1)-C(2) 1.546(2), Mg(2)-O(2) 1.9380(13), Mg(2)-N(5) 2.0769(17), C(2)-O(3) 1.268(2), C(2)-C(3) 1.386(2), C(3)-C(4) 1.323(3), O(4)-C(4) 1.158(2), O(3)-C(2)-C(3) 124.43(16), O(3)-C(2)-C(1) 114.24(14), C(3)-C(2)-C(1) 121.33(15), C(4)-C(3)-C(2) 120.44(17), C(4)-C(3)-Mo(1) 109.76(13), C(2)-C(3)-Mo(1) 129.79(13), O(4)-C(4)-C(3) 170.7(2).



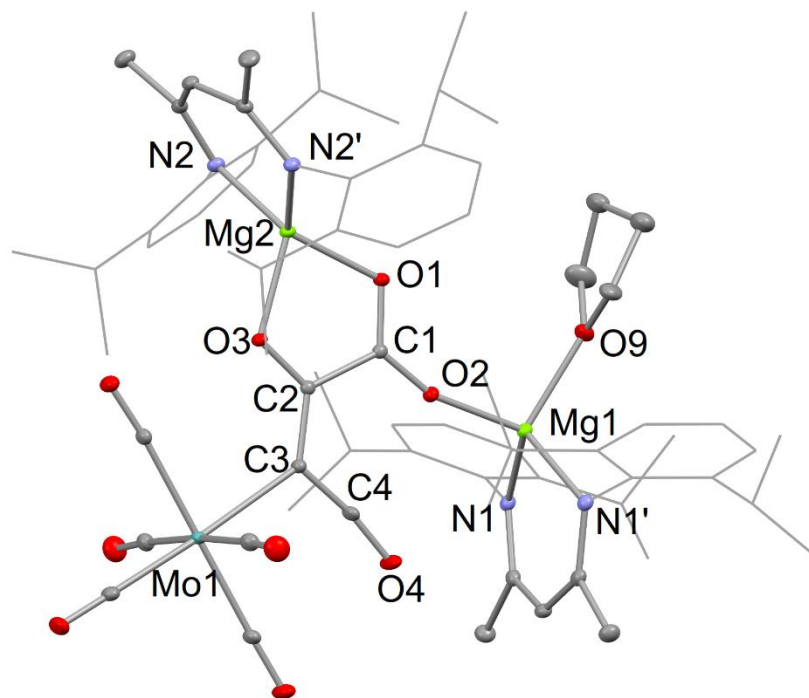

**Figure S18.** Molecular structure of **7** (25% thermal ellipsoids are shown; hydrogen atoms omitted; Dip substituents shown as wireframe for clarity). Selected bond lengths (Å) and angles (°): Mo(1)-C(3) 2.333(2), O(1)-C(1) 1.255(3), C(1)-O(2) 1.251(3), C(1)-C(2) 1.548(3), C(2)-O(3) 1.265(3), C(2)-C(3) 1.386(3), C(3)-C(4) 1.316(3), O(4)-C(4) 1.159(3), Mo(1)-C(3) 2.333(2), O(1)-C(1) 1.255(3), C(1)-O(2) 1.251(3), C(1)-C(2) 1.548(3), C(2)-O(3) 1.265(3), C(2)-C(3) 1.386(3), C(3)-C(4) 1.316(3), O(4)-C(4) 1.159(3), O(2)-C(1)-O(1) 125.8(2), O(2)-C(1)-C(2) 118.55(19), O(1)-C(1)-C(2) 115.62(18), O(3)-C(2)-C(3) 124.2(2), O(3)-C(2)-C(1) 114.01(19), C(3)-C(2)-C(1) 121.77(19), C(4)-C(3)-C(2) 121.6(2), C(4)-C(3)-Mo(1) 108.43(16), C(2)-C(3)-Mo(1) 129.95(16), O(4)-C(4)-C(3) 171.4(3).

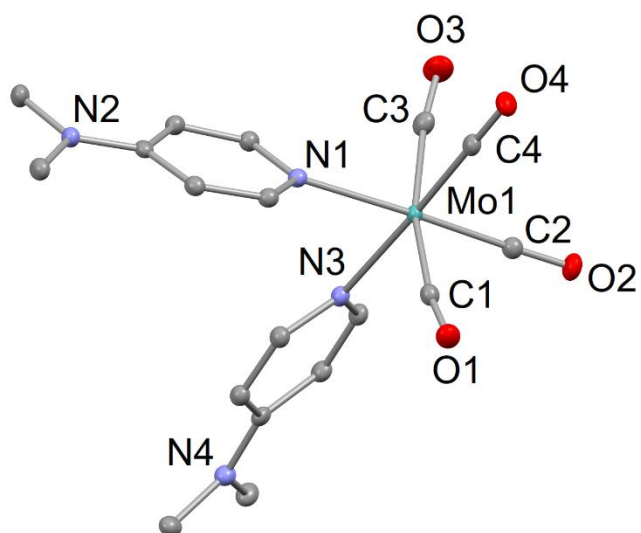

**Figure S19.** Molecular structure of **1S** (25% thermal ellipsoids are shown; hydrogen atoms omitted). Selected bond lengths (Å) and angles (°): Mo(1)-N(1) 2.230(2), Mo(1)-N(3) 2.298(2), N(1)-Mo(1)-N(3) 82.07(8).

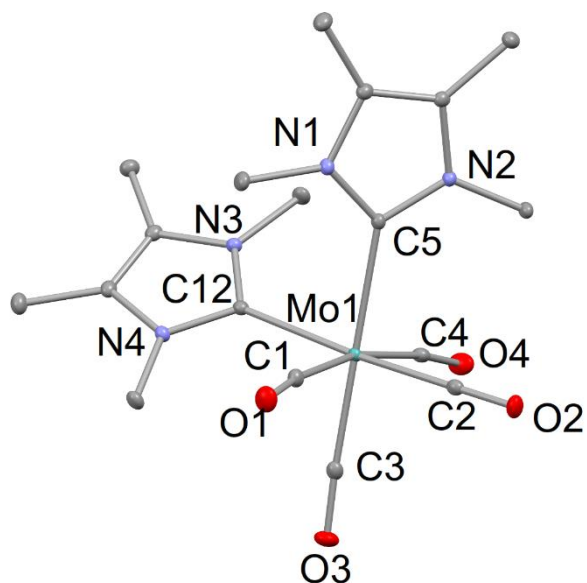

**Figure S20.** Molecular structure of **2S** (25% thermal ellipsoids are shown; hydrogen atoms omitted). Selected bond lengths (Å) and angles (°): Mo(1)-C(12) 2.2893(18), Mo(1)-C(5) 2.2894(17), C(12)-Mo(1)-C(5) 85.94(6).

### 3. Computational Studies

The optimizations were carried out by employing DFT hybrid functional (B3PW91)<sup>7</sup> along with small core pseudopotential Stuttgart basis set along with additional polarization functions for the molybdenum atom.<sup>8</sup> Pople basis sets (6-311+G\*\* for Mg atom and 6-31G\*\* for carbon, nitrogen, oxygen and hydrogen atoms) were employed for the rest of the atoms.<sup>9</sup> Frequency calculations were performed to locate minima for the optimized structures. All the calculations were performed using Gaussian 09 suite of programs.<sup>10</sup> NBO analysis were carried out using NBO 6.0 version as implemented in the Gaussian program.<sup>11</sup>

**Table S2:** Computed natural charges for **4**

| Atom label | Natural charges |
|------------|-----------------|
| Mg1        | 1.74139         |
| N3         | -0.80320        |
| N7         | -0.80387        |
| Mg5        | 1.76229         |
| N10        | -0.79402        |
| N13        | -0.79117        |
| Mg155      | 1.74139         |
| N157       | -0.80320        |
| N161       | -0.80387        |
| Mg159      | 1.76229         |
| N164       | -0.79402        |
| N167       | -0.79117        |
| O2         | -0.77900        |
| C4         | 0.33373         |
| O6         | -0.77613        |
| C8         | 0.33440         |
| O9         | -0.80745        |
| C11        | 0.38689         |
| O12        | -0.80868        |
| C14        | 0.38579         |
| O156       | -0.77900        |

|      |          |  |
|------|----------|--|
| C158 | 0.33373  |  |
| O160 | -0.77613 |  |
| C162 | 0.33440  |  |
| O163 | -0.80745 |  |
| C165 | 0.38689  |  |
| O166 | -0.80868 |  |
| C168 | 0.38579  |  |

**Table S3:** Computed Wiberg bond indices (WBI) for **4**

|     | WBI  |      | WBI  |       | WBI  |       | WBI  |     | WBI  |     | WBI  |     | WBI  |     | WBI  |
|-----|------|------|------|-------|------|-------|------|-----|------|-----|------|-----|------|-----|------|
| Mg1 | 0.00 | Mg5  | 0.00 | Mg155 | 0.00 | Mg159 | 0.00 | O2  | 1.40 | O6  | 1.40 | O9  | 1.39 | O12 | 1.39 |
| N3  | 0.10 | N10  | 0.09 | N157  | 0.10 | N164  | 0.09 | C4  | 0.00 | C4  | 1.10 | C4  | 0.11 | C4  | 1.08 |
| N7  | 0.10 | N13  | 0.09 | N161  | 0.10 | N167  | 0.09 | C8  | 1.10 | C8  | 0.00 | C8  | 1.08 | C8  | 0.11 |
| O2  | 0.10 | O12  | 0.08 | O156  | 0.10 | O9    | 0.09 | C11 | 0.11 | C11 | 1.08 | C11 | 0.00 | C11 | 1.06 |
| O6  | 0.10 | O163 | 0.09 | O160  | 0.10 | O166  | 0.08 | C14 | 1.08 | C14 | 0.11 | C14 | 1.06 | C14 | 0.00 |

**Table S4.** NBO analysis of bonding orbitals in squarate-core of **4**

(1.99608) BD ( 1) O 2- C 4  
( 65.46%) 0.8091\* O 2 s( 40.22%)p 1.48( 59.56%)d 0.01( 0.22%)  
( 34.54%) 0.5877\* C 4 s( 32.57%)p 2.06( 67.26%)d 0.01( 0.17%)  
(1.98184) BD ( 2) O 2- C 4  
( 75.88%) 0.8711\* O 2 s( 0.00%)p 1.00( 99.81%)d 0.00( 0.19%)  
( 24.12%) 0.4912\* C 4 s( 0.00%)p 1.00( 99.73%)d 0.00( 0.27%)  
(1.96410) BD ( 1) C 4- C 8  
( 50.04%) 0.7074\* C 4 s( 31.56%)p 2.17( 68.35%)d 0.00( 0.09%)  
( 49.96%) 0.7068\* C 8 s( 31.57%)p 2.16( 68.34%)d 0.00( 0.09%)  
(1.97027) BD ( 1) C 4- C 14  
( 50.77%) 0.7125\* C 4 s( 35.40%)p 1.82( 64.53%)d 0.00( 0.07%)  
( 49.23%) 0.7017\* C 14 s( 34.03%)p 1.94( 65.89%)d 0.00( 0.07%)  
(1.99608) BD ( 1) O 6- C 8  
( 65.37%) 0.8085\* O 6 s( 40.15%)p 1.48( 59.62%)d 0.01( 0.23%)  
( 34.63%) 0.5885\* C 8 s( 32.47%)p 2.07( 67.36%)d 0.01( 0.17%)  
(1.97981) BD ( 2) O 6- C 8  
( 75.80%) 0.8706\* O 6 s( 0.00%)p 1.00( 99.80%)d 0.00( 0.20%)

( 24.20%) 0.4920\* C 8 s( 0.00%)p 1.00( 99.73%)d 0.00( 0.27%)  
 (1.96887) BD ( 1) C 8- C 11

( 50.82%) 0.7129\* C 8 s( 35.47%)p 1.82( 64.46%)d 0.00( 0.07%)  
 ( 49.18%) 0.7013\* C 11 s( 33.72%)p 1.96( 66.21%)d 0.00( 0.07%)  
 (1.99666) BD ( 1) O 9- C 11

( 66.33%) 0.8144\* O 9 s( 44.66%)p 1.24( 55.16%)d 0.00( 0.17%)  
 ( 33.67%) 0.5803\* C 11 s( 32.79%)p 2.04( 67.03%)d 0.01( 0.18%)  
 (1.98642) BD ( 2) O 9- C 11

( 76.38%) 0.8739\* O 9 s( 0.00%)p 1.00( 99.87%)d 0.00( 0.13%)  
 ( 23.62%) 0.4860\* C 11 s( 0.00%)p 1.00( 99.73%)d 0.00( 0.27%)  
 (1.95959) BD ( 1) C 11- C 14

( 50.10%) 0.7078\* C 11 s( 32.94%)p 2.03( 66.99%)d 0.00( 0.08%)  
 ( 49.90%) 0.7064\* C 14 s( 32.66%)p 2.06( 67.26%)d 0.00( 0.08%)  
 (1.99659) BD ( 1) O 12- C 14

( 66.43%) 0.8151\* O 12 s( 45.90%)p 1.18( 53.94%)d 0.00( 0.17%)  
 ( 33.57%) 0.5794\* C 14 s( 32.76%)p 2.05( 67.06%)d 0.01( 0.18%)  
 (1.98522) BD ( 2) O 12- C 14

( 76.26%) 0.8733\* O 12 s( 0.00%)p 1.00( 99.88%)d 0.00( 0.12%)  
 ( 23.74%) 0.4873\* C 14 s( 0.00%)p 1.00( 99.73%)d 0.00( 0.26%)  
 (1.99608) BD ( 1) O156- C158

( 65.46%) 0.8091\* O156 s( 40.22%)p 1.48( 59.56%)d 0.01( 0.22%)  
 ( 34.54%) 0.5877\* C158 s( 32.57%)p 2.06( 67.26%)d 0.01( 0.17%)  
 (1.98184) BD ( 2) O156- C158

( 75.88%) 0.8711\* O156 s( 0.00%)p 1.00( 99.81%)d 0.00( 0.19%)  
 ( 24.12%) 0.4912\* C158 s( 0.00%)p 1.00( 99.73%)d 0.00( 0.27%)  
 (1.96410) BD ( 1) C158- C162

( 50.04%) 0.7074\* C158 s( 31.56%)p 2.17( 68.35%)d 0.00( 0.09%)  
 ( 49.96%) 0.7068\* C162 s( 31.57%)p 2.16( 68.34%)d 0.00( 0.09%)  
 (1.97027) BD ( 1) C158- C168

( 50.77%) 0.7125\* C158 s( 35.40%)p 1.82( 64.53%)d 0.00( 0.07%)  
 ( 49.23%) 0.7017\* C168 s( 34.03%)p 1.94( 65.89%)d 0.00( 0.07%)  
 (1.99608) BD ( 1) O160- C162

( 65.37%) 0.8085\* O160 s( 40.15%)p 1.48( 59.62%)d 0.01( 0.23%)  
 ( 34.63%) 0.5885\* C162 s( 32.47%)p 2.07( 67.36%)d 0.01( 0.17%)  
 (1.97981) BD ( 2) O160- C162

( 75.80%) 0.8706\* O160 s( 0.00%)p 1.00( 99.80%)d 0.00( 0.20%)  
 ( 24.20%) 0.4920\* C162 s( 0.00%)p 1.00( 99.73%)d 0.00( 0.27%)

(1.96887) BD ( 1) C162- C165  
 ( 50.82%) 0.7129\* C162 s( 35.47%)p 1.82( 64.46%)d 0.00( 0.07%)  
 ( 49.18%) 0.7013\* C165 s( 33.72%)p 1.96( 66.21%)d 0.00( 0.07%)  
 (1.99666) BD ( 1) O163- C165  
 ( 66.33%) 0.8144\* O163 s( 44.66%)p 1.24( 55.16%)d 0.00( 0.17%)  
 ( 33.67%) 0.5803\* C165 s( 32.79%)p 2.04( 67.03%)d 0.01( 0.18%)  
 (1.98642) BD ( 2) O163- C165  
 ( 76.38%) 0.8739\* O163 s( 0.00%)p 1.00( 99.87%)d 0.00( 0.13%)  
 ( 23.62%) 0.4860\* C165 s( 0.00%)p 1.00( 99.73%)d 0.00( 0.27%)  
 (1.95959) BD ( 1) C165- C168  
 ( 50.10%) 0.7078\* C165 s( 32.94%)p 2.03( 66.99%)d 0.00( 0.08%)  
 ( 49.90%) 0.7064\* C168 s( 32.66%)p 2.06( 67.26%)d 0.00( 0.08%)  
 (1.99659) BD ( 1) O166- C168  
 ( 66.43%) 0.8151\* O166 s( 45.90%)p 1.18( 53.94%)d 0.00( 0.17%)  
 ( 33.57%) 0.5794\* C168 s( 32.76%)p 2.05( 67.06%)d 0.01( 0.18%)  
 (1.98522) BD ( 2) O166- C168  
 ( 76.26%) 0.8733\* O166 s( 0.00%)p 1.00( 99.88%)d 0.00( 0.12%)  
 ( 23.74%) 0.4873\* C168 s( 0.00%)p 1.00( 99.73%)d 0.00( 0.26%)

**Table S5:** Second order perturbation analysis for 4

| Donor NBO                                                                                                                                                          | Acceptor NBO                                                                                | E(2)<br>kcal/mol |
|--------------------------------------------------------------------------------------------------------------------------------------------------------------------|---------------------------------------------------------------------------------------------|------------------|
| (1.96420) LP ( 1) O 2<br>s( 54.40%)p 0.84( 45.54%)d 0.00( 0.06%)                                                                                                   | (0.22072) LV ( 1)Mg 1<br>s( 99.76%)p 0.00( 0.14%)d 0.00( 0.10%)                             | 8.67             |
| (1.86968) LP ( 2) O 2<br>s( 5.37%)p17.61( 94.50%)d 0.03( 0.14%)                                                                                                    | (0.22072) LV ( 1)Mg 1<br>s( 99.76%)p 0.00( 0.14%)d 0.00( 0.10%)                             | 17.92            |
| (1.96585) LP ( 1) O 6<br>s( 54.39%)p 0.84( 45.55%)d 0.00( 0.06%)                                                                                                   | (0.22072) LV ( 1)Mg 1<br>s( 99.76%)p 0.00( 0.14%)d 0.00( 0.10%)                             | 8.78             |
| (1.86963) LP ( 2) O 6<br>s( 5.44%)p17.36( 94.42%)d 0.03( 0.14%)                                                                                                    | (0.22072) LV ( 1)Mg 1<br>s( 99.76%)p 0.00( 0.14%)d 0.00( 0.10%)                             | 17.94            |
| (1.99608) BD ( 1) O 2- C 4<br>( 65.46%) 0.8091* O 2 s( 40.22%)p 1.48( 59.56%)d<br>0.01( 0.22%)<br>( 34.54%) 0.5877* C 4 s( 32.57%)p 2.06( 67.26%)d<br>0.01( 0.17%) | (0.22072) LV ( 1)Mg 1<br>s( 99.76%)p 0.00( 0.14%)d 0.00( 0.10%)                             | 2.09             |
| (1.99608) BD ( 1) O 6- C 8<br>( 65.37%) 0.8085* O 6 s( 40.15%)p 1.48( 59.62%)d<br>0.01( 0.23%)<br>( 34.63%) 0.5885* C 8 s( 32.47%)p 2.07( 67.36%)d<br>0.01( 0.17%) | (0.22072) LV ( 1)Mg 1<br>s( 99.76%)p 0.00( 0.14%)d 0.00( 0.10%)                             | 2.24             |
| (1.96420) LP ( 1) O 2<br>s( 54.40%)p 0.84( 45.54%)d 0.00( 0.06%)                                                                                                   | (0.08070) BD*( 1) C 4- C 8<br>( 49.96%) 0.7068* C 4 s( 31.56%)p 2.17( 68.35%)d 0.00( 0.09%) | 4.79             |

|                                                                   |                                                                                                                                                                   |       |
|-------------------------------------------------------------------|-------------------------------------------------------------------------------------------------------------------------------------------------------------------|-------|
|                                                                   | ( 50.04%) -0.7074* C 8 s( 31.57%)p 2.16( 68.34%)d 0.00( 0.09%)                                                                                                    |       |
| (1.86968) LP ( 2) O 2<br>s( 5.37%)p17.61( 94.50%)d 0.03( 0.14%)   | (0.08070) BD*( 1) C 4- C 8<br>( 49.96%) 0.7068* C 4 s( 31.56%)p 2.17( 68.35%)d 0.00( 0.09%)<br>( 50.04%) -0.7074* C 8 s( 31.57%)p 2.16( 68.34%)d 0.00( 0.09%)     | 10.08 |
| (1.86968) LP ( 2) O 2<br>s( 5.37%)p17.61( 94.50%)d 0.03( 0.14%)   | (0.09921) BD*( 1) C 4- C 14<br>( 49.23%) 0.7017* C 4 s( 35.40%)p 1.82( 64.53%)d 0.00( 0.07%)<br>( 50.77%) -0.7125* C 14 s( 34.03%)p 1.94( 65.89%)d 0.00( 0.07%)   | 20.50 |
| (1.96585) LP ( 1) O 6<br>s( 54.39%)p 0.84( 45.55%)d 0.00( 0.06%)  | (0.08070) BD*( 1) C 4- C 8<br>( 49.96%) 0.7068* C 4 s( 31.56%)p 2.17( 68.35%)d 0.00( 0.09%)<br>( 50.04%) -0.7074* C 8 s( 31.57%)p 2.16( 68.34%)d 0.00( 0.09%)     | 4.93  |
| (1.86963) LP ( 2) O 6<br>s( 5.44%)p17.36( 94.42%)d 0.03( 0.14%)   | (0.08070) BD*( 1) C 4- C 8<br>( 49.96%) 0.7068* C 4 s( 31.56%)p 2.17( 68.35%)d 0.00( 0.09%)<br>( 50.04%) -0.7074* C 8 s( 31.57%)p 2.16( 68.34%)d 0.00( 0.09%)     | 10.04 |
| (1.86963) LP ( 2) O 6<br>s( 5.44%)p17.36( 94.42%)d 0.03( 0.14%)   | (0.09598) BD*( 1) C 8- C 11<br>( 49.18%) 0.7013* C 8 s( 35.47%)p 1.82( 64.46%)d 0.00( 0.07%)<br>( 50.82%) -0.7129* C 11 s( 33.72%)p 1.96( 66.21%)d 0.00( 0.07%)   | 20.39 |
| (1.88723) LP ( 2) O 9<br>s( 1.70%)p57.85( 98.24%)d 0.04( 0.06%)   | (0.09598) BD*( 1) C 8- C 11<br>( 49.18%) 0.7013* C 8 s( 35.47%)p 1.82( 64.46%)d 0.00( 0.07%)<br>( 50.82%) -0.7129* C 11 s( 33.72%)p 1.96( 66.21%)d 0.00( 0.07%)   | 19.56 |
| (1.88723) LP ( 2) O 9<br>s( 1.70%)p57.85( 98.24%)d 0.04( 0.06%)   | (0.09785) BD*( 1) C 11- C 14<br>( 49.90%) 0.7064* C 11 s( 32.94%)p 2.03( 66.99%)d 0.00( 0.08%)<br>( 50.10%) -0.7078* C 14 s( 32.66%)p 2.06( 67.26%)d 0.00( 0.08%) | 13.60 |
| (1.94396) LP ( 1) O 12<br>s( 53.85%)p 0.86( 46.14%)d 0.00( 0.01%) | (0.09921) BD*( 1) C 4- C 14<br>( 49.23%) 0.7017* C 4 s( 35.40%)p 1.82( 64.53%)d 0.00( 0.07%)<br>( 50.77%) -0.7125* C 14 s( 34.03%)p 1.94( 65.89%)d 0.00( 0.07%)   | 3.84  |
| (1.89003) LP ( 2) O 12<br>s( 0.19%)p99.99( 99.74%)d 0.37( 0.07%)  | (0.09921) BD*( 1) C 4- C 14<br>( 49.23%) 0.7017* C 4 s( 35.40%)p 1.82( 64.53%)d 0.00( 0.07%)<br>( 50.77%) -0.7125* C 14 s( 34.03%)p 1.94( 65.89%)d 0.00( 0.07%)   | 16.80 |
| (1.89003) LP ( 2) O 12<br>s( 0.19%)p99.99( 99.74%)d 0.37( 0.07%)  | (0.09785) BD*( 1) C 11- C 14<br>( 49.90%) 0.7064* C 11 s( 32.94%)p 2.03( 66.99%)d 0.00( 0.08%)<br>( 50.10%) -0.7078* C 14 s( 32.66%)p 2.06( 67.26%)d 0.00( 0.08%) | 19.29 |
| (1.98184) BD ( 2) O 2- C 4                                        | (0.50038) BD*( 2) O 6- C 8                                                                                                                                        | 7.25  |

|                                                                                                                                                                |                                                                                                                                                                   |      |
|----------------------------------------------------------------------------------------------------------------------------------------------------------------|-------------------------------------------------------------------------------------------------------------------------------------------------------------------|------|
| ( 75.88%) 0.8711* O 2 s( 0.00%)p 1.00( 99.81%)d 0.00( 0.19%)<br>( 24.12%) 0.4912* C 4 s( 0.00%)p 1.00( 99.73%)d 0.00( 0.27%)                                   | ( 24.20%) 0.4920* O 6 s( 0.00%)p 1.00( 99.80%)d 0.00( 0.20%)<br>( 75.80%) -0.8706* C 8 s( 0.00%)p 1.00( 99.73%)d 0.00( 0.27%)                                     |      |
| (1.98184) BD ( 2) O 2- C 4<br>( 75.88%) 0.8711* O 2 s( 0.00%)p 1.00( 99.81%)d 0.00( 0.19%)<br>( 24.12%) 0.4912* C 4 s( 0.00%)p 1.00( 99.73%)d 0.00( 0.27%)     | (0.49858) BD*( 2) O 12- C 14<br>( 23.74%) 0.4873* O 12 s( 0.00%)p 1.00( 99.88%)d 0.00( 0.12%)<br>( 76.26%) -0.8733* C 14 s( 0.00%)p 1.00( 99.73%)d 0.00( 0.26%)   | 5.21 |
| (1.96410) BD ( 1) C 4- C 8<br>( 50.04%) 0.7074* C 4 s( 31.56%)p 2.17( 68.35%)d 0.00( 0.09%)<br>( 49.96%) 0.7068* C 8 s( 31.57%)p 2.16( 68.34%)d 0.00( 0.09%)   | (0.02501) BD*( 1) O 9- C 11<br>( 33.67%) 0.5803* O 9 s( 44.66%)p 1.24( 55.16%)d 0.00( 0.17%)<br>( 66.33%) -0.8144* C 11 s( 32.79%)p 2.04( 67.03%)d 0.01( 0.18%)   | 8.87 |
| (1.96410) BD ( 1) C 4- C 8<br>( 50.04%) 0.7074* C 4 s( 31.56%)p 2.17( 68.35%)d 0.00( 0.09%)<br>( 49.96%) 0.7068* C 8 s( 31.57%)p 2.16( 68.34%)d 0.00( 0.09%)   | (0.02620) BD*( 1) O 12- C 14<br>( 33.57%) 0.5794* O 12 s( 45.90%)p 1.18( 53.94%)d 0.00( 0.17%)<br>( 66.43%) -0.8151* C 14 s( 32.76%)p 2.05( 67.06%)d 0.01( 0.18%) | 9.11 |
| (1.97027) BD ( 1) C 4- C 14<br>( 50.77%) 0.7125* C 4 s( 35.40%)p 1.82( 64.53%)d 0.00( 0.07%)<br>( 49.23%) 0.7017* C 14 s( 34.03%)p 1.94( 65.89%)d 0.00( 0.07%) | (0.02558) BD*( 1) O 6- C 8<br>( 34.63%) 0.5885* O 6 s( 40.15%)p 1.48( 59.62%)d 0.01( 0.23%)<br>( 65.37%) -0.8085* C 8 s( 32.47%)p 2.07( 67.36%)d 0.01( 0.17%)     | 6.50 |
| (1.97027) BD ( 1) C 4- C 14<br>( 50.77%) 0.7125* C 4 s( 35.40%)p 1.82( 64.53%)d 0.00( 0.07%)<br>( 49.23%) 0.7017* C 14 s( 34.03%)p 1.94( 65.89%)d 0.00( 0.07%) | (0.02501) BD*( 1) O 9- C 11<br>( 33.67%) 0.5803* O 9 s( 44.66%)p 1.24( 55.16%)d 0.00( 0.17%)<br>( 66.33%) -0.8144* C 11 s( 32.79%)p 2.04( 67.03%)d 0.01( 0.18%)   | 6.68 |
| (1.97981) BD ( 2) O 6- C 8<br>( 75.80%) 0.8706* O 6 s( 0.00%)p 1.00( 99.80%)d 0.00( 0.20%)<br>( 24.20%) 0.4920* C 8 s( 0.00%)p 1.00( 99.73%)d 0.00( 0.27%)     | (0.49681) BD*( 2) O 9- C 11<br>( 23.62%) 0.4860* O 9 s( 0.00%)p 1.00( 99.87%)d 0.00( 0.13%)<br>( 76.38%) -0.8739* C 11 s( 0.00%)p 1.00( 99.73%)d 0.00( 0.27%)     | 5.31 |
| (1.96887) BD ( 1) C 8- C 11<br>( 50.82%) 0.7129* C 8 s( 35.47%)p 1.82( 64.46%)d 0.00( 0.07%)<br>( 49.18%) 0.7013* C 11 s( 33.72%)p 1.96( 66.21%)d 0.00( 0.07%) | (0.02536) BD*( 1) O 2- C 4<br>( 34.54%) 0.5877* O 2 s( 40.22%)p 1.48( 59.56%)d 0.01( 0.22%)<br>( 65.46%) -0.8091* C 4 s( 32.57%)p 2.06( 67.26%)d 0.01( 0.17%)     | 6.45 |
| (1.96887) BD ( 1) C 8- C 11<br>( 50.82%) 0.7129* C 8 s( 35.47%)p 1.82( 64.46%)d 0.00( 0.07%)<br>( 49.18%) 0.7013* C 11 s( 33.72%)p 1.96( 66.21%)d 0.00( 0.07%) | (0.02620) BD*( 1) O 12- C 14<br>( 33.57%) 0.5794* O 12 s( 45.90%)p 1.18( 53.94%)d 0.00( 0.17%)<br>( 66.43%) -0.8151* C 14 s( 32.76%)p 2.05( 67.06%)d 0.01( 0.18%) | 6.68 |
| (1.98642) BD ( 2) O 9- C 11<br>( 76.38%) 0.8739* O 9 s( 0.00%)p 1.00( 99.87%)d 0.00( 0.13%)<br>( 23.62%) 0.4860* C 11 s( 0.00%)p 1.00( 99.73%)d 0.00( 0.27%)   | (0.50038) BD*( 2) O 6- C 8<br>( 24.20%) 0.4920* O 6 s( 0.00%)p 1.00( 99.80%)d 0.00( 0.20%)<br>( 75.80%) -0.8706* C 8 s( 0.00%)p 1.00( 99.73%)d 0.00( 0.27%)       | 5.64 |
| (1.98642) BD ( 2) O 9- C 11<br>( 76.38%) 0.8739* O 9 s( 0.00%)p 1.00( 99.87%)d 0.00( 0.13%)<br>( 23.62%) 0.4860* C 11 s( 0.00%)p 1.00( 99.73%)d 0.00( 0.27%)   | (0.49858) BD*( 2) O 12- C 14<br>( 23.74%) 0.4873* O 12 s( 0.00%)p 1.00( 99.88%)d 0.00( 0.12%)<br>( 76.26%) -0.8733* C 14 s( 0.00%)p 1.00( 99.73%)d 0.00( 0.26%)   | 5.15 |



|                                                                                                                                                                  |                                                                                                                                                               |       |
|------------------------------------------------------------------------------------------------------------------------------------------------------------------|---------------------------------------------------------------------------------------------------------------------------------------------------------------|-------|
| (1.95959) BD ( 1) C 11- C 14<br>( 50.10%) 0.7078* C 11 s( 32.94%)p 2.03( 66.99%)d 0.00( 0.08%)<br>( 49.90%) 0.7064* C 14 s( 32.66%)p 2.06( 67.26%)d 0.00( 0.08%) | (0.02536) BD*( 1) O 2- C 4<br>( 34.54%) 0.5877* O 2 s( 40.22%)p 1.48( 59.56%)d 0.01( 0.22%)<br>( 65.46%) -0.8091* C 4 s( 32.57%)p 2.06( 67.26%)d 0.01( 0.17%) | 9.99  |
| (1.95959) BD ( 1) C 11- C 14<br>( 50.10%) 0.7078* C 11 s( 32.94%)p 2.03( 66.99%)d 0.00( 0.08%)<br>( 49.90%) 0.7064* C 14 s( 32.66%)p 2.06( 67.26%)d 0.00( 0.08%) | (0.02558) BD*( 1) O 6- C 8<br>( 34.63%) 0.5885* O 6 s( 40.15%)p 1.48( 59.62%)d 0.01( 0.23%)<br>( 65.37%) -0.8085* C 8 s( 32.47%)p 2.07( 67.36%)d 0.01( 0.17%) | 10.15 |
| (1.98522) BD ( 2) O 12- C 14<br>( 76.26%) 0.8733* O 12 s( 0.00%)p 1.00( 99.88%)d 0.00( 0.12%)<br>( 23.74%) 0.4873* C 14 s( 0.00%)p 1.00( 99.73%)d 0.00( 0.26%)   | (0.49681) BD*( 2) O 9- C 11<br>( 23.62%) 0.4860* O 9 s( 0.00%)p 1.00( 99.87%)d 0.00( 0.13%)<br>( 76.38%) -0.8739* C 11 s( 0.00%)p 1.00( 99.73%)d 0.00( 0.27%) | 5.17  |
| (1.94396) LP ( 1) O 12<br>s( 53.85%)p 0.86( 46.14%)d 0.00( 0.01%)                                                                                                | (0.20045) LV ( 1)Mg 5<br>s( 99.94%)p 0.00( 0.04%)d 0.00( 0.02%)                                                                                               | 25.24 |
| (1.99659) BD ( 1) O 12- C 14<br>( 66.43%) 0.8151* O 12 s( 45.90%)p 1.18( 53.94%)d 0.00( 0.17%)<br>( 33.57%) 0.5794* C 14 s( 32.76%)p 2.05( 67.06%)d 0.01( 0.18%) | (0.20045) LV ( 1)Mg 5<br>s( 99.94%)p 0.00( 0.04%)d 0.00( 0.02%)                                                                                               | 3.02  |
| (1.94652) LP ( 1) O 9<br>s( 53.58%)p 0.87( 46.39%)d 0.00( 0.03%)                                                                                                 | (0.20045) LV ( 1)Mg159<br>s( 99.94%)p 0.00( 0.04%)d 0.00( 0.02%)                                                                                              | 22.21 |
| (1.88723) LP ( 2) O 9<br>s( 1.70%)p57.85( 98.24%)d 0.04( 0.06%)                                                                                                  | (0.20045) LV ( 1)Mg159<br>s( 99.94%)p 0.00( 0.04%)d 0.00( 0.02%)                                                                                              | 7.84  |
| (1.99666) BD ( 1) O 9- C 11<br>( 66.33%) 0.8144* O 9 s( 44.66%)p 1.24( 55.16%)d 0.00( 0.17%)<br>( 33.67%) 0.5803* C 11 s( 32.79%)p 2.04( 67.03%)d 0.01( 0.18%)   | (0.20045) LV ( 1)Mg159<br>s( 99.94%)p 0.00( 0.04%)d 0.00( 0.02%)                                                                                              | 2.57  |
| (1.88723) LP ( 2) O 9<br>s( 1.70%)p57.85( 98.24%)d 0.04( 0.06%)                                                                                                  | (0.22072) LV ( 1)Mg 1<br>s( 99.76%)p 0.00( 0.14%)d 0.00( 0.10%)                                                                                               | 25.40 |
| (1.86845) LP ( 1) N 7<br>s( 27.08%)p 2.69( 72.92%)d 0.00( 0.01%)                                                                                                 | (0.22072) LV ( 1)Mg 1<br>s( 99.76%)p 0.00( 0.14%)d 0.00( 0.10%)                                                                                               | 25.39 |
| (1.86556) LP ( 1) N 10<br>s( 26.68%)p 2.75( 73.31%)d 0.00( 0.01%)                                                                                                | (0.20045) LV ( 1)Mg 5<br>s( 99.94%)p 0.00( 0.04%)d 0.00( 0.02%)                                                                                               | 25.13 |
| (1.86553) LP ( 1) N 13<br>s( 26.60%)p 2.76( 73.40%)d 0.00( 0.01%)                                                                                                | (0.20045) LV ( 1)Mg 5<br>s( 99.94%)p 0.00( 0.04%)d 0.00( 0.02%)                                                                                               | 25.05 |
| (1.94652) LP ( 1) O163<br>s( 53.58%)p 0.87( 46.39%)d 0.00( 0.03%)                                                                                                | (0.20045) LV ( 1)Mg 5<br>s( 99.94%)p 0.00( 0.04%)d 0.00( 0.02%)                                                                                               | 22.21 |
| (1.88723) LP ( 2) O163<br>s( 1.70%)p57.85( 98.24%)d 0.04( 0.06%)                                                                                                 | (0.20045) LV ( 1)Mg 5<br>s( 99.94%)p 0.00( 0.04%)d 0.00( 0.02%)                                                                                               | 7.84  |
| (1.99666) BD ( 1) O163- C165<br>( 66.33%) 0.8144* O163 s( 44.66%)p 1.24( 55.16%)d 0.00( 0.17%)<br>( 33.67%) 0.5803* C165 s( 32.79%)p 2.04( 67.03%)d 0.01( 0.18%) | (0.20045) LV ( 1)Mg 5<br>s( 99.94%)p 0.00( 0.04%)d 0.00( 0.02%)                                                                                               | 2.57  |
| (1.96420) LP ( 1) O156<br>s( 54.40%)p 0.84( 45.54%)d 0.00( 0.06%)                                                                                                | (0.22072) LV ( 1)Mg155<br>s( 99.76%)p 0.00( 0.14%)d 0.00( 0.10%)                                                                                              | 8.67  |
| (1.86968) LP ( 2) O156<br>s( 5.37%)p17.61( 94.50%)d 0.03( 0.14%)                                                                                                 | (0.22072) LV ( 1)Mg155<br>s( 99.76%)p 0.00( 0.14%)d 0.00( 0.10%)                                                                                              | 17.92 |
| (1.96585) LP ( 1) O160<br>s( 54.39%)p 0.84( 45.55%)d 0.00( 0.06%)                                                                                                | (0.22072) LV ( 1)Mg155<br>s( 99.76%)p 0.00( 0.14%)d 0.00( 0.10%)                                                                                              | 8.78  |

|                                                                                                                                                                        |                                                                                                                                                                         |       |
|------------------------------------------------------------------------------------------------------------------------------------------------------------------------|-------------------------------------------------------------------------------------------------------------------------------------------------------------------------|-------|
| (1.86963) LP ( 2) O160<br>s( 5.44%)p17.36( 94.42%)d 0.03( 0.14%)                                                                                                       | (0.22072) LV ( 1)Mg155<br>s( 99.76%)p 0.00( 0.14%)d 0.00( 0.10%)                                                                                                        | 17.94 |
| (1.98184) BD ( 2) O156- C158<br>( 75.88%) 0.8711* O156 s( 0.00%)p 1.00(99.81%)d<br>0.00( 0.19%)<br>( 24.12%) 0.4912* C158 s( 0.00%)p 1.00(99.73%)d<br>0.00( 0.27%)     | (0.22072) LV ( 1)Mg155<br>s( 99.76%)p 0.00( 0.14%)d 0.00( 0.10%)                                                                                                        | 2.09  |
| (1.99608) BD ( 1) O160- C162<br>( 65.37%) 0.8085* O160 s( 40.15%)p 1.48(<br>59.62%)d 0.01( 0.23%)<br>( 34.63%) 0.5885* C162 s( 32.47%)p 2.07(<br>67.36%)d 0.01( 0.17%) | (0.22072) LV ( 1)Mg155<br>s( 99.76%)p 0.00( 0.14%)d 0.00( 0.10%)                                                                                                        | 2.24  |
| (1.96420) LP ( 1) O156<br>s( 54.40%)p 0.84( 45.54%)d 0.00( 0.06%)                                                                                                      | (0.08070) BD*( 1) C158- C162<br>( 49.96%) 0.7068* C158 s( 31.56%)p 2.17(<br>68.35%)d 0.00( 0.09%)<br>( 50.04%) -0.7074* C162 s( 31.57%)p 2.16(<br>68.34%)d 0.00( 0.09%) | 4.79  |
| (1.86968) LP ( 2) O156<br>s( 5.37%)p17.61( 94.50%)d 0.03( 0.14%)                                                                                                       | (0.08070) BD*( 1) C158- C162<br>( 49.96%) 0.7068* C158 s( 31.56%)p 2.17(<br>68.35%)d 0.00( 0.09%)<br>( 50.04%) -0.7074* C162 s( 31.57%)p 2.16(<br>68.34%)d 0.00( 0.09%) | 10.08 |
| (1.86968) LP ( 2) O156<br>s( 5.37%)p17.61( 94.50%)d 0.03( 0.14%)                                                                                                       | (0.09921) BD*( 1) C158- C168<br>( 49.23%) 0.7017* C158 s( 35.40%)p 1.82(<br>64.53%)d 0.00( 0.07%)<br>( 50.77%) -0.7125* C168 s( 34.03%)p 1.94(<br>65.89%)d 0.00( 0.07%) | 20.50 |
| (1.96585) LP ( 1) O160<br>s( 54.39%)p 0.84( 45.55%)d 0.00( 0.06%)                                                                                                      | (0.08070) BD*( 1) C158- C162<br>( 49.96%) 0.7068* C158 s( 31.56%)p 2.17(<br>68.35%)d 0.00( 0.09%)<br>( 50.04%) -0.7074* C162 s( 31.57%)p 2.16(<br>68.34%)d 0.00( 0.09%) | 4.93  |
| (1.86963) LP ( 2) O160<br>s( 5.44%)p17.36( 94.42%)d 0.03( 0.14%)                                                                                                       | (0.08070) BD*( 1) C158- C162<br>( 49.96%) 0.7068* C158 s( 31.56%)p 2.17(<br>68.35%)d 0.00( 0.09%)<br>( 50.04%) -0.7074* C162 s( 31.57%)p 2.16(<br>68.34%)d 0.00( 0.09%) | 10.04 |
| (1.86963) LP ( 2) O160<br>s( 5.44%)p17.36( 94.42%)d 0.03( 0.14%)                                                                                                       | (0.09598) BD*( 1) C162- C165<br>( 49.18%) 0.7013* C162 s( 35.47%)p 1.82(<br>64.46%)d 0.00( 0.07%)<br>( 50.82%) -0.7129* C165 s( 33.72%)p 1.96(<br>66.21%)d 0.00( 0.07%) | 20.39 |
| (1.94652) LP ( 1) O163<br>s( 53.58%)p 0.87( 46.39%)d 0.00( 0.03%)                                                                                                      | (0.09785) BD*( 1) C165- C168<br>( 49.90%) 0.7064* C165 s( 32.94%)p 2.03(<br>66.99%)d 0.00( 0.08%)<br>( 50.10%) -0.7078* C168 s( 32.66%)p 2.06(<br>67.26%)d 0.00( 0.08%) | 5.31  |
| (1.88723) LP ( 2) O163<br>s( 1.70%)p57.85( 98.24%)d 0.04( 0.06%)                                                                                                       | (0.09598) BD*( 1) C162- C165<br>( 49.18%) 0.7013* C162 s( 35.47%)p 1.82(<br>64.46%)d 0.00( 0.07%)<br>( 50.82%) -0.7129* C165 s( 33.72%)p 1.96(<br>66.21%)d 0.00( 0.07%) | 19.56 |
| (1.88723) LP ( 2) O163<br>s( 1.70%)p57.85( 98.24%)d 0.04( 0.06%)                                                                                                       | (0.09785) BD*( 1) C165- C168                                                                                                                                            | 13.60 |

|                                                                                                                                                                  |                                                                                                                                                                   |       |
|------------------------------------------------------------------------------------------------------------------------------------------------------------------|-------------------------------------------------------------------------------------------------------------------------------------------------------------------|-------|
|                                                                                                                                                                  | ( 49.90%) 0.7064* C165 s( 32.94%)p 2.03( 66.99%)d 0.00( 0.08%)<br>( 50.10%) -0.7078* C168 s( 32.66%)p 2.06( 67.26%)d 0.00( 0.08%)                                 |       |
| (1.89003) LP ( 2) O166<br>s( 0.19%)p99.99( 99.74%)d 0.37( 0.07%)                                                                                                 | (0.09921) BD*( 1) C158- C168<br>( 49.23%) 0.7017* C158 s( 35.40%)p 1.82( 64.53%)d 0.00( 0.07%)<br>( 50.77%) -0.7125* C168 s( 34.03%)p 1.94( 65.89%)d 0.00( 0.07%) | 16.80 |
| (1.89003) LP ( 2) O166<br>s( 0.19%)p99.99( 99.74%)d 0.37( 0.07%)                                                                                                 | (0.09785) BD*( 1) C165- C168<br>( 49.90%) 0.7064* C165 s( 32.94%)p 2.03( 66.99%)d 0.00( 0.08%)<br>( 50.10%) -0.7078* C168 s( 32.66%)p 2.06( 67.26%)d 0.00( 0.08%) | 19.29 |
| (1.98184) BD ( 2) O156- C158<br>( 75.88%) 0.8711* O156 s( 0.00%)p 1.00( 99.81%)d 0.00( 0.19%)<br>( 24.12%) 0.4912* C158 s( 0.00%)p 1.00( 99.73%)d 0.00( 0.27%)   | (0.50038) BD*( 2) O160- C162<br>( 24.20%) 0.4920* O160 s( 0.00%)p 1.00( 99.80%)d 0.00( 0.20%)<br>( 75.80%) -0.8706* C162 s( 0.00%)p 1.00( 99.73%)d 0.00( 0.27%)   | 7.25  |
| (1.98184) BD ( 2) O156- C158<br>( 75.88%) 0.8711* O156 s( 0.00%)p 1.00( 99.81%)d 0.00( 0.19%)<br>( 24.12%) 0.4912* C158 s( 0.00%)p 1.00( 99.73%)d 0.00( 0.27%)   | (0.49858) BD*( 2) O166- C168<br>( 23.74%) 0.4873* O166 s( 0.00%)p 1.00( 99.88%)d 0.00( 0.12%)<br>( 76.26%) -0.8733* C168 s( 0.00%)p 1.00( 99.73%)d 0.00( 0.26%)   | 5.21  |
| (1.96410) BD ( 1) C158- C162<br>( 50.04%) 0.7074* C158 s( 31.56%)p 2.17( 68.35%)d 0.00( 0.09%)<br>( 49.96%) 0.7068* C162 s( 31.57%)p 2.16( 68.34%)d 0.00( 0.09%) | (0.02501) BD*( 1) O163- C165<br>( 33.67%) 0.5803* O163 s( 44.66%)p 1.24( 55.16%)d 0.00( 0.17%)<br>( 66.33%) -0.8144* C165 s( 32.79%)p 2.04( 67.03%)d 0.01( 0.18%) | 8.87  |
| (1.96410) BD ( 1) C158- C162<br>( 50.04%) 0.7074* C158 s( 31.56%)p 2.17( 68.35%)d 0.00( 0.09%)<br>( 49.96%) 0.7068* C162 s( 31.57%)p 2.16( 68.34%)d 0.00( 0.09%) | (0.02620) BD*( 1) O166- C168<br>( 33.57%) 0.5794* O166 s( 45.90%)p 1.18( 53.94%)d 0.00( 0.17%)<br>( 66.43%) -0.8151* C168 s( 32.76%)p 2.05( 67.06%)d 0.01( 0.18%) | 9.11  |
| (1.97027) BD ( 1) C158- C168<br>( 50.77%) 0.7125* C158 s( 35.40%)p 1.82( 64.53%)d 0.00( 0.07%)<br>( 49.23%) 0.7017* C168 s( 34.03%)p 1.94( 65.89%)d 0.00( 0.07%) | (0.02558) BD*( 1) O160- C162<br>( 34.63%) 0.5885* O160 s( 40.15%)p 1.48( 59.62%)d 0.01( 0.23%)<br>( 65.37%) -0.8085* C162 s( 32.47%)p 2.07( 67.36%)d 0.01( 0.17%) | 6.50  |
| (1.97027) BD ( 1) C158- C168<br>( 50.77%) 0.7125* C158 s( 35.40%)p 1.82( 64.53%)d 0.00( 0.07%)<br>( 49.23%) 0.7017* C168 s( 34.03%)p 1.94( 65.89%)d 0.00( 0.07%) | (0.02501) BD*( 1) O163- C165<br>( 33.67%) 0.5803* O163 s( 44.66%)p 1.24( 55.16%)d 0.00( 0.17%)<br>( 66.33%) -0.8144* C165 s( 32.79%)p 2.04( 67.03%)d 0.01( 0.18%) | 6.68  |
| (1.97981) BD ( 2) O160- C162<br>( 75.80%) 0.8706* O160 s( 0.00%)p 1.00( 99.80%)d 0.00( 0.20%)<br>( 24.20%) 0.4920* C162 s( 0.00%)p 1.00( 99.73%)d 0.00( 0.27%)   | (0.49681) BD*( 2) O163- C165<br>( 23.62%) 0.4860* O163 s( 0.00%)p 1.00( 99.87%)d 0.00( 0.13%)<br>( 76.38%) -0.8739* C165 s( 0.00%)p 1.00( 99.73%)d 0.00( 0.27%)   | 5.31  |
| (1.97981) BD ( 2) O160- C162<br>( 75.80%) 0.8706* O160 s( 0.00%)p 1.00( 99.80%)d 0.00( 0.20%)<br>( 24.20%) 0.4920* C162 s( 0.00%)p 1.00( 99.73%)d 0.00( 0.27%)   | (0.02536) BD*( 1) O156- C158<br>( 34.54%) 0.5877* O156 s( 40.22%)p 1.48( 59.56%)d 0.01( 0.22%)<br>( 65.46%) -0.8091* C158 s( 32.57%)p 2.06( 67.26%)d 0.01( 0.17%) | 6.45  |

|                                                                                                                                                                        |                                                                                                                                                                         |       |
|------------------------------------------------------------------------------------------------------------------------------------------------------------------------|-------------------------------------------------------------------------------------------------------------------------------------------------------------------------|-------|
| (1.96887) BD ( 1) C162- C165<br>( 50.82%) 0.7129* C162 s( 35.47%)p 1.82(<br>64.46%)d 0.00( 0.07%)<br>( 49.18%) 0.7013* C165 s( 33.72%)p 1.96(<br>66.21%)d 0.00( 0.07%) | (0.02620) BD*( 1) O166- C168<br>( 33.57%) 0.5794* O166 s( 45.90%)p 1.18(<br>53.94%)d 0.00( 0.17%)<br>( 66.43%) -0.8151* C168 s( 32.76%)p 2.05(<br>67.06%)d 0.01( 0.18%) | 6.68  |
| (1.98642) BD ( 2) O163- C165<br>( 76.38%) 0.8739* O163 s( 0.00%)p 1.00(99.87%)d<br>0.00( 0.13%)<br>( 23.62%) 0.4860* C165 s( 0.00%)p 1.00(99.73%)d<br>0.00( 0.27%)     | (0.50038) BD*( 2) O160- C162<br>( 24.20%) 0.4920* O160 s( 0.00%)p 1.00(<br>99.80%)d 0.00( 0.20%)<br>( 75.80%) -0.8706* C162 s( 0.00%)p 1.00(<br>99.73%)d 0.00( 0.27%)   | 5.64  |
| (1.98642) BD ( 2) O163- C165<br>( 76.38%) 0.8739* O163 s( 0.00%)p 1.00(99.87%)d<br>0.00( 0.13%)<br>( 23.62%) 0.4860* C165 s( 0.00%)p 1.00(99.73%)d<br>0.00( 0.27%)     | (0.49858) BD*( 2) O166- C168<br>( 23.74%) 0.4873* O166 s( 0.00%)p 1.00(<br>99.88%)d 0.00( 0.12%)<br>( 76.26%) -0.8733* C168 s( 0.00%)p 1.00(<br>99.73%)d 0.00( 0.26%)   | 5.15  |
| (1.95959) BD ( 1) C165- C168<br>( 50.10%) 0.7078* C165 s( 32.94%)p 2.03(<br>66.99%)d 0.00( 0.08%)<br>( 49.90%) 0.7064* C168 s( 32.66%)p 2.06(<br>67.26%)d 0.00( 0.08%) | (0.02536) BD*( 1) O156- C158<br>( 34.54%) 0.5877* O156 s( 40.22%)p 1.48(<br>59.56%)d 0.01( 0.22%)<br>( 65.46%) -0.8091* C158 s( 32.57%)p 2.06(<br>67.26%)d 0.01( 0.17%) | 9.99  |
| (1.95959) BD ( 1) C165- C168<br>( 50.10%) 0.7078* C165 s( 32.94%)p 2.03(<br>66.99%)d 0.00( 0.08%)<br>( 49.90%) 0.7064* C168 s( 32.66%)p 2.06(<br>67.26%)d 0.00( 0.08%) | (0.02558) BD*( 1) O160- C162<br>( 34.63%) 0.5885* O160 s( 40.15%)p 1.48(<br>59.62%)d 0.01( 0.23%)<br>( 65.37%) -0.8085* C162 s( 32.47%)p 2.07(<br>67.36%)d 0.01( 0.17%) | 10.15 |
| (1.98522) BD ( 2) O166- C168<br>( 76.26%) 0.8733* O166 s( 0.00%)p 1.00(99.88%)d<br>0.00( 0.12%)<br>( 23.74%) 0.4873* C168 s( 0.00%)p 1.00(99.73%)d<br>0.00( 0.26%)     | (0.49681) BD*( 2) O163- C165<br>( 23.62%) 0.4860* O163 s( 0.00%)p 1.00(<br>99.87%)d 0.00( 0.13%)<br>( 76.38%) -0.8739* C165 s( 0.00%)p 1.00(<br>99.73%)d 0.00( 0.27%)   | 5.17  |
| (1.94396) LP ( 1) O166<br>s( 53.85%)p 0.86( 46.14%)d 0.00( 0.01%)                                                                                                      | (0.20045) LV ( 1)Mg159<br>s( 99.94%)p 0.00( 0.04%)d 0.00( 0.02%)                                                                                                        | 25.24 |
| (1.99659) BD ( 1) O166- C168<br>( 66.43%) 0.8151* O166 s( 45.90%)p 1.18(<br>53.94%)d 0.00( 0.17%)<br>( 33.57%) 0.5794* C168 s( 32.76%)p 2.05(<br>67.06%)d 0.01( 0.18%) | (0.20045) LV ( 1)Mg159<br>s( 99.94%)p 0.00( 0.04%)d 0.00( 0.02%)                                                                                                        | 3.02  |
| (1.86856) LP ( 1) N157<br>s( 27.09%)p 2.69( 72.91%)d 0.00( 0.01%)                                                                                                      | (0.22072) LV ( 1)Mg155<br>s( 99.76%)p 0.00( 0.14%)d 0.00( 0.10%)                                                                                                        | 25.40 |
| (1.86845) LP ( 1) N161<br>s( 27.08%)p 2.69( 72.92%)d 0.00( 0.01%)                                                                                                      | (0.22072) LV ( 1)Mg155<br>s( 99.76%)p 0.00( 0.14%)d 0.00( 0.10%)                                                                                                        | 25.39 |
| (1.86556) LP ( 1) N164<br>s( 26.68%)p 2.75( 73.31%)d 0.00( 0.01%)                                                                                                      | (0.20045) LV ( 1)Mg159<br>s( 99.94%)p 0.00( 0.04%)d 0.00( 0.02%)                                                                                                        | 25.13 |
| (1.86553) LP ( 1) N167<br>s( 26.60%)p 2.76( 73.40%)d 0.00( 0.01%)                                                                                                      | (0.20045) LV ( 1)Mg159<br>s( 99.94%)p 0.00( 0.04%)d 0.00( 0.02%)                                                                                                        | 25.05 |

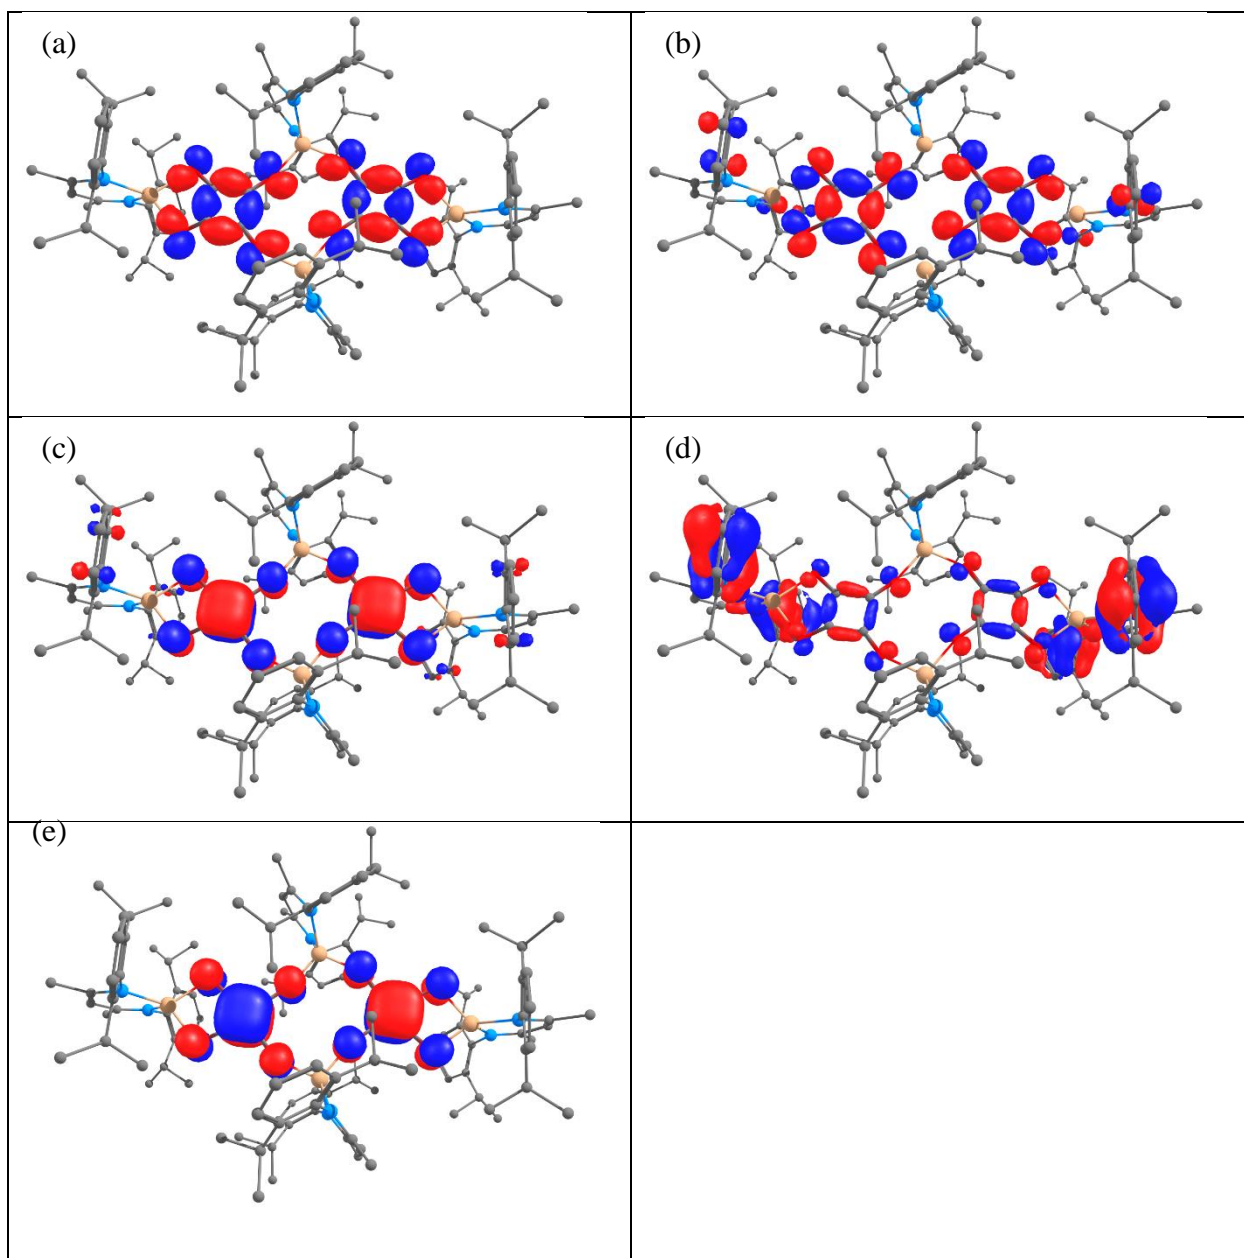

**Figure S21.** DFT computed MOs for **4**. (a) HOMO-23 (b) HOMO-22 (c) HOMO-17 (d) HOMO-15 (e) HOMO-14.

**Table S6:** Computed natural charges for **6**.

| Atom label | Natural charges |
|------------|-----------------|
| Mo1        | -1.00558        |
| C12        | -0.53637        |
| C18        | 0.61276         |
| C21        | 0.61946         |
| C23        | 0.60972         |
| C25        | 0.59282         |
| C27        | 0.61741         |
| Mg2        | 1.70102         |
| O3         | -0.84087        |
| C5         | 0.81015         |
| Mg6        | 1.77560         |
| O7         | -0.83004        |
| C9         | 0.38088         |
| O10        | -0.79937        |
| N11        | -0.81100        |
| C12        | -0.53637        |
| O13        | -0.44318        |
| N14        | -0.78618        |
| N17        | -0.81015        |
| N20        | -0.79767        |
| C28        | -0.06609        |
| O16        | -0.46211        |
| O19        | -0.46277        |
| O22        | -0.46439        |
| O24        | -0.45552        |
| O26        | -0.47689        |

**Table S7:** Computed Wiberg bond index (WBI) for **6**.

|     |      |     |      |     |      |    |      |     |      |     |      |     |      |
|-----|------|-----|------|-----|------|----|------|-----|------|-----|------|-----|------|
| Mo1 | 0.00 | Mg2 | 0.00 | Mg6 | 0.00 | O3 | 1.37 | C5  | 0.92 | Mo1 | 0.29 | C12 | 1.62 |
| C12 | 0.29 | O3  | 0.08 | O7  | 0.08 | C5 | 0.00 | C9  | 0.00 | C9  | 1.37 | O13 | 1.94 |
| C18 | 0.80 | N11 | 0.09 | O10 | 0.08 | O7 | 1.40 | O10 | 1.37 | C12 | 0.00 | C15 | 0.00 |
| C21 | 0.78 | N14 | 0.08 | N17 | 0.09 | C9 | 0.92 | C12 | 1.37 | C15 | 1.62 |     |      |
| C23 | 0.81 | C28 | 0.18 | N20 | 0.08 |    |      |     |      |     |      |     |      |
| C25 | 0.83 |     |      |     |      |    |      |     |      |     |      |     |      |
| C27 | 1.04 |     |      |     |      |    |      |     |      |     |      |     |      |

**Table S8.** NBO analysis of bonding orbitals in ketene-core of **6**.

(1.69432) BD ( 1)Mo 1- C 12  
 ( 45.51%) 0.6746\*Mo 1 s( 3.95%)p 0.06( 0.23%)d24.27( 95.82%)  
 ( 54.49%) 0.7382\* C 12 s( 27.35%)p 2.66( 72.62%)d 0.00( 0.04%)  
 (1.94396) BD ( 1)Mo 1- C 21  
 ( 27.85%) 0.5277\*Mo 1 s( 34.71%)p 0.00( 0.08%)d 1.88( 65.21%)  
 ( 72.15%) 0.8494\* C 21 s( 68.27%)p 0.46( 31.73%)d 0.00( 0.00%)  
 (1.95025) BD ( 1)Mo 1- C 23  
 ( 28.80%) 0.5366\*Mo 1 s( 32.98%)p 0.00( 0.11%)d 2.03( 66.91%)

( 71.20%) 0.8438\* C 23 s( 68.26%)p 0.46( 31.74%)d 0.00( 0.00%)  
 (1.90237) BD ( 1)Mo 1- C 27  
 ( 33.10%) 0.5753\*Mo 1 s( 25.37%)p 0.01( 0.31%)d 2.93( 74.32%)  
 ( 66.90%) 0.8179\* C 27 s( 67.27%)p 0.49( 32.73%)d 0.00( 0.00%)  
 (1.99504) BD ( 1) O 3- C 5  
 ( 67.53%) 0.8217\* O 3 s( 43.30%)p 1.31( 56.52%)d 0.00( 0.19%)  
 ( 32.47%) 0.5699\* C 5 s( 32.09%)p 2.11( 67.70%)d 0.01( 0.21%)  
 (1.99500) BD ( 1) C 5- O 7  
 ( 32.84%) 0.5731\* C 5 s( 31.46%)p 2.17( 68.34%)d 0.01( 0.20%)  
 ( 67.16%) 0.8195\* O 7 s( 40.51%)p 1.46( 59.26%)d 0.01( 0.23%)  
 (1.98298) BD ( 2) C 5- O 7  
 ( 22.52%) 0.4745\* C 5 s( 0.00%)p 1.00( 99.66%)d 0.00( 0.34%)  
 ( 77.48%) 0.8803\* O 7 s( 0.00%)p 1.00( 99.81%)d 0.00( 0.19%)  
 (1.97569) BD ( 1) C 5- C 9  
 ( 49.06%) 0.7005\* C 5 s( 36.33%)p 1.75( 63.59%)d 0.00( 0.08%)  
 ( 50.94%) 0.7137\* C 9 s( 31.15%)p 2.21( 68.77%)d 0.00( 0.08%)  
 (1.99377) BD ( 1) C 9- O 10  
 ( 33.85%) 0.5818\* C 9 s( 28.51%)p 2.50( 71.30%)d 0.01( 0.18%)  
 ( 66.15%) 0.8133\* O 10 s( 41.24%)p 1.42( 58.56%)d 0.01( 0.21%)  
 (1.97177) BD ( 2) C 9- O 10  
 ( 24.22%) 0.4922\* C 9 s( 0.00%)p 1.00( 99.71%)d 0.00( 0.29%)  
 ( 75.78%) 0.8705\* O 10 s( 0.00%)p 1.00( 99.83%)d 0.00( 0.17%)  
 (1.96443) BD ( 1) C 9- C 12  
 ( 49.57%) 0.7040\* C 9 s( 40.09%)p 1.49( 59.85%)d 0.00( 0.06%)  
 ( 50.43%) 0.7102\* C 12 s( 40.12%)p 1.49( 59.80%)d 0.00( 0.07%)  
 (1.98073) BD ( 1) C 12- C 15  
 ( 49.63%) 0.7045\* C 12 s( 32.52%)p 2.07( 67.39%)d 0.00( 0.10%)  
 ( 50.37%) 0.7097\* C 15 s( 59.52%)p 0.68( 40.45%)d 0.00( 0.03%)  
 (1.99624) BD ( 1) O 13- C 15  
 ( 66.29%) 0.8142\* O 13 s( 43.67%)p 1.28( 56.00%)d 0.01( 0.34%)  
 ( 33.71%) 0.5806\* C 15 s( 40.02%)p 1.49( 59.82%)d 0.00( 0.17%)  
 (1.99233) BD ( 2) O 13- C 15  
 ( 74.64%) 0.8640\* O 13 s( 0.51%)p99.99( 99.16%)d 0.63( 0.32%)  
 ( 25.36%) 0.5036\* C 15 s( 0.36%)p99.99( 99.29%)d 0.98( 0.35%)  
 (1.98702) BD ( 3) O 13- C 15  
 ( 73.79%) 0.8590\* O 13 s( 0.00%)p 1.00( 99.67%)d 0.00( 0.33%)  
 ( 26.21%) 0.5119\* C 15 s( 0.00%)p 1.00( 99.67%)d 0.00( 0.33%)

**Table S9:** Second order perturbation analysis for **6**

| Donor NBO                                                       | Acceptor NBO                                                                                                                                                  | E(2)<br>kcal/mol |
|-----------------------------------------------------------------|---------------------------------------------------------------------------------------------------------------------------------------------------------------|------------------|
| (1.88339) LP ( 2) O 3<br>s( 0.02%)p99.99( 99.91%)d 3.19( 0.07%) | (0.04945) BD*( 1) C 5- O 7<br>( 67.16%) 0.8195* C 5 s( 31.46%)p 2.17( 68.34%)d 0.01( 0.20%)<br>( 32.84%) -0.5731* O 7 s( 40.51%)p 1.46( 59.26%)d 0.01( 0.23%) | 18.68            |
| (1.88339) LP ( 2) O 3<br>s( 0.02%)p99.99( 99.91%)d 3.19( 0.07%) | (0.12062) BD*( 1) C 5- C 9<br>( 50.94%) 0.7137* C 5 s( 36.33%)p 1.75( 63.59%)d 0.00( 0.08%)<br>( 49.06%) -0.7005* C 9 s( 31.15%)p 2.21( 68.77%)d 0.00( 0.08%) | 16.22            |
| (1.64498) LP ( 3) O 3<br>s( 0.00%)p 1.00( 99.87%)d 0.00( 0.12%) | (0.38632) BD*( 2) C 5- O 7                                                                                                                                    | 99.98            |

|                                                                                                                                                               |                                                                                                                                                                   |        |
|---------------------------------------------------------------------------------------------------------------------------------------------------------------|-------------------------------------------------------------------------------------------------------------------------------------------------------------------|--------|
|                                                                                                                                                               | ( 77.48%) 0.8803* C 5 s( 0.00%)p 1.00( 99.66%)d 0.00( 0.34%)<br>( 22.52%) -0.4745* O 7 s( 0.00%)p 1.00( 99.81%)d 0.00( 0.19%)                                     |        |
| (1.89296) LP ( 2) O 7<br>s( 2.31%)p42.31( 97.58%)d 0.05( 0.11%)                                                                                               | (0.05117) BD*( 1) O 3- C 5<br>( 32.47%) 0.5699* O 3 s( 43.30%)p 1.31( 56.52%)d 0.00( 0.19%)<br>( 67.53%) -0.8217* C 5 s( 32.09%)p 2.11( 67.70%)d 0.01( 0.21%)     | 21.02  |
| (1.89296) LP ( 2) O 7<br>s( 2.31%)p42.31( 97.58%)d 0.05( 0.11%)                                                                                               | (0.12062) BD*( 1) C 5- C 9<br>( 50.94%) 0.7137* C 5 s( 36.33%)p 1.75( 63.59%)d 0.00( 0.08%)<br>( 49.06%) -0.7005* C 9 s( 31.15%)p 2.21( 68.77%)d 0.00( 0.08%)     | 11.07  |
| (1.95608) LP ( 1) O 10<br>s( 55.41%)p 0.80( 44.54%)d 0.00( 0.06%)                                                                                             | (0.12062) BD*( 1) C 5- C 9<br>( 50.94%) 0.7137* C 5 s( 36.33%)p 1.75( 63.59%)d 0.00( 0.08%)<br>( 49.06%) -0.7005* C 9 s( 31.15%)p 2.21( 68.77%)d 0.00( 0.08%)     | 3.55   |
| (1.90129) LP ( 2) O 10<br>s( 3.33%)p28.99( 96.57%)d 0.03( 0.10%)                                                                                              | (0.12062) BD*( 1) C 5- C 9<br>( 50.94%) 0.7137* C 5 s( 36.33%)p 1.75( 63.59%)d 0.00( 0.08%)<br>( 49.06%) -0.7005* C 9 s( 31.15%)p 2.21( 68.77%)d 0.00( 0.08%)     | 11.74  |
| (1.90129) LP ( 2) O 10<br>s( 3.33%)p28.99( 96.57%)d 0.03( 0.10%)                                                                                              | (0.04038) BD*( 1) C 9- C 12<br>( 50.43%) 0.7102* C 9 s( 40.09%)p 1.49( 59.85%)d 0.00( 0.06%)<br>( 49.57%) -0.7040* C 12 s( 40.12%)p 1.49( 59.80%)d 0.00( 0.07%)   | 13.53  |
| (1.13107) LP ( 1) C 12<br>s( 0.00%)p 1.00( 99.88%)d 0.00( 0.12%)                                                                                              | (0.47772) BD*( 2) C 9- O 10<br>( 75.78%) 0.8705* C 9 s( 0.00%)p 1.00( 99.71%)d 0.00( 0.29%)<br>( 24.22%) -0.4922* O 10 s( 0.00%)p 1.00( 99.83%)d 0.00( 0.17%)     | 288.87 |
| (1.13107) LP ( 1) C 12<br>s( 0.00%)p 1.00( 99.88%)d 0.00( 0.12%)                                                                                              | (0.39419) BD*( 3) O 13- C 15<br>( 26.21%) 0.5119* O 13 s( 0.00%)p 1.00( 99.67%)d 0.00( 0.33%)<br>( 73.79%) -0.8590* C 15 s( 0.00%)p 1.00( 99.67%)d 0.00( 0.33%)   | 247.68 |
| (1.97452) LP ( 1) O 13<br>s( 55.81%)p 0.79( 44.12%)d 0.00( 0.07%)                                                                                             | (0.01941) BD*( 1) C 12- C 15<br>( 50.37%) 0.7097* C 12 s( 32.52%)p 2.07( 67.39%)d 0.00( 0.10%)<br>( 49.63%) -0.7045* C 15 s( 59.52%)p 0.68( 40.45%)d 0.00( 0.03%) | 10.39  |
| (1.69432) BD ( 1)Mo 1- C 12<br>( 45.51%) 0.6746*Mo 1 s( 3.95%)p 0.06( 0.23%)d24.27( 95.82%)<br>( 54.49%) 0.7382* C 12 s( 27.35%)p 2.66( 72.62%)d 0.00( 0.04%) | (0.30690) BD*( 2) O 13- C 15<br>( 25.36%) 0.5036* O 13 s( 0.51%)p99.99( 99.16%)d 0.63( 0.32%)<br>( 74.64%) -0.8640* C 15 s( 0.36%)p99.99( 99.29%)d 0.98( 0.35%)   | 24.48  |
| (1.98298) BD ( 2) C 5- O 7<br>( 22.52%) 0.4745* C 5 s( 0.00%)p 1.00( 99.66%)d 0.00( 0.34%)<br>( 77.48%) 0.8803* O 7 s( 0.00%)p 1.00( 99.81%)d 0.00( 0.19%)    | (0.47772) BD*( 2) C 9- O 10<br>( 75.78%) 0.8705* C 9 s( 0.00%)p 1.00( 99.71%)d 0.00( 0.29%)<br>( 24.22%) -0.4922* O 10 s( 0.00%)p 1.00( 99.83%)d 0.00( 0.17%)     | 4.72   |



|                                                                                                                                                                |                                                                                                                                                                   |       |
|----------------------------------------------------------------------------------------------------------------------------------------------------------------|-------------------------------------------------------------------------------------------------------------------------------------------------------------------|-------|
| (1.97177) BD ( 2) C 9- O 10<br>( 24.22%) 0.4922* C 9 s( 0.00%)p 1.00( 99.71%)d 0.00( 0.29%)<br>( 75.78%) 0.8705* O 10 s( 0.00%)p 1.00( 99.83%)d 0.00( 0.17%)   | (0.38632) BD*( 2) C 5- O 7<br>( 77.48%) 0.8803* C 5 s( 0.00%)p 1.00( 99.66%)d 0.00( 0.34%)<br>( 22.52%) -0.4745* O 7 s( 0.00%)p 1.00( 99.81%)d 0.00( 0.19%)       | 5.54  |
| (1.96443) BD ( 1) C 9- C 12<br>( 49.57%) 0.7040* C 9 s( 40.09%)p 1.49( 59.85%)d 0.00( 0.06%)<br>( 50.43%) 0.7102* C 12 s( 40.12%)p 1.49( 59.80%)d 0.00( 0.07%) | (0.01941) BD*( 1) C 12- C 15<br>( 50.37%) 0.7097* C 12 s( 32.52%)p 2.07( 67.39%)d 0.00( 0.10%)<br>( 49.63%) -0.7045* C 15 s( 59.52%)p 0.68( 40.45%)d 0.00( 0.03%) | 4.50  |
| (1.96443) BD ( 1) C 9- C 12<br>( 49.57%) 0.7040* C 9 s( 40.09%)p 1.49( 59.85%)d 0.00( 0.06%)<br>( 50.43%) 0.7102* C 12 s( 40.12%)p 1.49( 59.80%)d 0.00( 0.07%) | (0.02075) BD*( 1) O 13- C 15<br>( 33.71%) 0.5806* O 13 s( 43.67%)p 1.28( 56.00%)d 0.01( 0.34%)<br>( 66.29%) -0.8142* C 15 s( 40.02%)p 1.49( 59.82%)d 0.00( 0.17%) | 6.64  |
| (1.94462) LP ( 1) O 3<br>s( 56.62%)p 0.77( 43.35%)d 0.00( 0.03%)                                                                                               | (0.25817) LV ( 1)Mg 2<br>s( 99.75%)p 0.00( 0.23%)d 0.00( 0.02%)                                                                                                   | 23.25 |
| 131. BD ( 1) O 3- C 5                                                                                                                                          | (0.25817) LV ( 1)Mg 2<br>s( 99.75%)p 0.00( 0.23%)d 0.00( 0.02%)                                                                                                   | 3.77  |
| (1.95413) LP ( 1) O 7<br>s( 57.15%)p 0.75( 42.79%)d 0.00( 0.05%)                                                                                               | (0.18661) LV ( 1)Mg 6<br>s( 99.94%)p 0.00( 0.03%)d 0.00( 0.03%)                                                                                                   | 13.86 |
| (1.89296) LP ( 2) O 7<br>s( 2.31%)p 42.31( 97.58%)d 0.05( 0.11%)                                                                                               | (0.18661) LV ( 1)Mg 6<br>s( 99.94%)p 0.00( 0.03%)d 0.00( 0.03%)                                                                                                   | 11.41 |
| (1.95608) LP ( 1) O 10<br>s( 55.41%)p 0.80( 44.54%)d 0.00( 0.06%)                                                                                              | (0.18661) LV ( 1)Mg 6<br>s( 99.94%)p 0.00( 0.03%)d 0.00( 0.03%)                                                                                                   | 14.13 |
| (1.90129) LP ( 2) O 10<br>s( 3.33%)p 28.99( 96.57%)d 0.03( 0.10%)                                                                                              | (0.18661) LV ( 1)Mg 6<br>s( 99.94%)p 0.00( 0.03%)d 0.00( 0.03%)                                                                                                   | 13.06 |
| (1.99500) BD ( 1) C 5- O 7<br>( 32.84%) 0.5731* C 5 s( 31.46%)p 2.17( 68.34%)d 0.01( 0.20%)<br>( 67.16%) 0.8195* O 7 s( 40.51%)p 1.46( 59.26%)d 0.01( 0.23%)   | (0.18661) LV ( 1)Mg 6<br>s( 99.94%)p 0.00( 0.03%)d 0.00( 0.03%)                                                                                                   | 2.81  |
| (1.99377) BD ( 1) C 9- O 10<br>( 33.85%) 0.5818* C 9 s( 28.51%)p 2.50( 71.30%)d 0.01( 0.18%)<br>( 66.15%) 0.8133* O 10 s( 41.24%)p 1.42( 58.56%)d 0.01( 0.21%) | (0.18661) LV ( 1)Mg 6<br>s( 99.94%)p 0.00( 0.03%)d 0.00( 0.03%)                                                                                                   | 2.94  |
| (1.85266) LP ( 1) C 28<br>s( 43.68%)p 1.29( 56.31%)d 0.00( 0.02%)                                                                                              | (0.25817) LV ( 1)Mg 2<br>s( 99.75%)p 0.00( 0.23%)d 0.00( 0.02%)                                                                                                   | 43.01 |
| (1.86962) LP ( 1) N 11<br>s( 27.27%)p 2.67( 72.73%)d 0.00( 0.01%)                                                                                              | (0.25817) LV ( 1)Mg 2<br>s( 99.75%)p 0.00( 0.23%)d 0.00( 0.02%)                                                                                                   | 23.54 |
| (1.86975) LP ( 1) N 14<br>s( 26.60%)p 2.76( 73.39%)d 0.00( 0.01%)                                                                                              | (0.25817) LV ( 1)Mg 2<br>s( 99.75%)p 0.00( 0.23%)d 0.00( 0.02%)                                                                                                   | 22.19 |
| (1.87580) LP ( 1) N 17<br>s( 27.02%)p 2.70( 72.98%)d 0.00( 0.01%)                                                                                              | (0.18661) LV ( 1)Mg 6<br>s( 99.94%)p 0.00( 0.03%)d 0.00( 0.03%)                                                                                                   | 21.40 |
| (1.87316) LP ( 1) N 20<br>s( 26.36%)p 2.79( 73.63%)d 0.00( 0.01%)                                                                                              | (0.18661) LV ( 1)Mg 6<br>s( 99.94%)p 0.00( 0.03%)d 0.00( 0.03%)                                                                                                   | 20.38 |
| 170. BD ( 1) O 24- C 25                                                                                                                                        | (0.46911) BD*( 1)Mo 1- C 21<br>( 72.15%) 0.8494*Mo 1 s( 34.71%)p 0.00( 0.08%)d 1.88( 65.21%)<br>( 27.85%) -0.5277* C 21 s( 68.27%)p 0.46( 31.73%)d 0.00( 0.00%)   | 6.47  |
| (1.47834) LP ( 1)Mo 1<br>s( 0.00%)p 0.00( 0.00%)d 1.00(100.00%)                                                                                                | (0.14909) BD*( 2) O 16- C 18                                                                                                                                      | 38.93 |

|                                                                 |                                                                                                                                                                 |       |
|-----------------------------------------------------------------|-----------------------------------------------------------------------------------------------------------------------------------------------------------------|-------|
|                                                                 | ( 24.76%) 0.4976* O 16 s( 0.03%)p99.99( 99.60%)d10.66( 0.37%)<br>( 75.24%) -0.8674* C 18 s( 0.01%)p 1.00( 99.59%)d 0.00( 0.41%)                                 |       |
| (1.47834) LP ( 1)Mo 1<br>s( 0.00%)p 0.00( 0.00%)d 1.00(100.00%) | (0.14263) BD*( 3) O 19- C 21<br>( 24.87%) 0.4987* O 19 s( 0.00%)p 1.00( 99.63%)d 0.00( 0.37%)<br>( 75.13%) -0.8668* C 21 s( 0.00%)p 1.00( 99.59%)d 0.00( 0.41%) | 36.65 |
| (1.47834) LP ( 1)Mo 1<br>s( 0.00%)p 0.00( 0.00%)d 1.00(100.00%) | (0.15078) BD*( 2) O 22- C 23<br>( 24.74%) 0.4974* O 22 s( 0.04%)p99.99( 99.59%)d 8.99( 0.37%)<br>( 75.26%) -0.8675* C 23 s( 0.02%)p99.99( 99.58%)d25.09( 0.41%) | 38.61 |
| (1.47834) LP ( 1)Mo 1<br>s( 0.00%)p 0.00( 0.00%)d 1.00(100.00%) | (0.15039) BD*( 2) O 24- C 25<br>( 25.11%) 0.5011* O 24 s( 0.02%)p99.99( 99.61%)d15.87( 0.37%)<br>( 74.89%) -0.8654* C 25 s( 0.02%)p99.99( 99.59%)d26.13( 0.40%) | 38.51 |

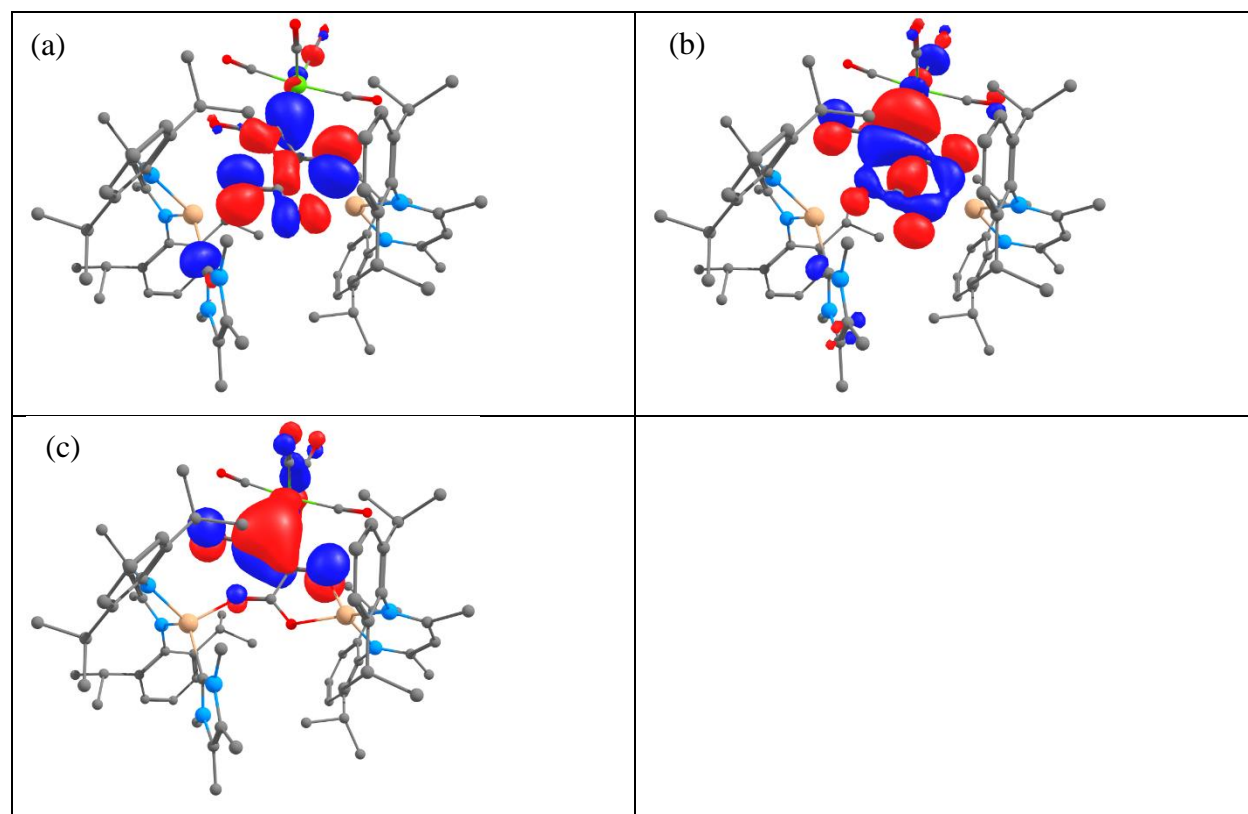

**Figure S22.** DFT computed MOs for **6**. (a) HOMO-16 (b) HOMO-14 (c) HOMO-13

**Table S10.** Optimised geometries (xyz coordinates) of calculated molecules.

| <b>4</b> |              |              |              |
|----------|--------------|--------------|--------------|
| Mg       | 1.112390000  | -2.639326000 | 5.787831000  |
| O        | 1.068546000  | -3.112605000 | 3.736710000  |
| N        | 2.838982000  | -2.930022000 | 6.881613000  |
| C        | 0.748479000  | -2.007820000 | 3.210816000  |
| Mg       | 0.550101000  | -2.477838000 | -1.042334000 |
| O        | 0.581176000  | -0.691909000 | 5.203863000  |
| N        | -0.100692000 | -3.664519000 | 7.106351000  |
| C        | 0.504320000  | -0.796571000 | 3.946101000  |
| O        | -0.099037000 | 1.100739000  | 2.398899000  |
| N        | 2.359014000  | -3.440010000 | -1.317358000 |
| C        | 0.220255000  | -0.068507000 | 2.707456000  |
| O        | 0.442942000  | -1.592643000 | 0.727845000  |
| N        | -0.589279000 | -4.202925000 | -1.105774000 |
| C        | 0.473097000  | -1.320274000 | 1.943830000  |
| C        | 4.097632000  | -3.543731000 | 8.905928000  |
| H        | 4.830509000  | -4.148944000 | 8.364817000  |
| H        | 3.925486000  | -3.994543000 | 9.884102000  |
| H        | 4.554769000  | -2.560683000 | 9.050168000  |
| C        | 2.809554000  | -3.427634000 | 8.121513000  |
| C        | 1.652029000  | -3.884504000 | 8.778228000  |
| H        | 1.816600000  | -4.233469000 | 9.790313000  |
| C        | 0.334976000  | -4.046691000 | 8.310352000  |
| C        | -0.621311000 | -4.726863000 | 9.264604000  |
| H        | -1.466386000 | -4.073951000 | 9.500319000  |
| H        | -0.122835000 | -5.001476000 | 10.195090000 |
| H        | -1.044384000 | -5.629315000 | 8.814147000  |
| C        | 4.113653000  | -2.610541000 | 6.306873000  |
| C        | 4.793103000  | -3.590356000 | 5.543638000  |
| C        | 6.009233000  | -3.247754000 | 4.944505000  |
| H        | 6.541000000  | -3.994575000 | 4.360315000  |
| C        | 6.551590000  | -1.975161000 | 5.081294000  |
| H        | 7.495785000  | -1.728008000 | 4.603748000  |
| C        | 5.879265000  | -1.024400000 | 5.838787000  |
| H        | 6.308150000  | -0.031990000 | 5.951985000  |
| C        | 4.666100000  | -1.318210000 | 6.469739000  |
| C        | 4.255778000  | -5.004867000 | 5.369238000  |
| H        | 3.332893000  | -5.083253000 | 5.952782000  |
| C        | 5.232588000  | -6.059573000 | 5.911200000  |
| H        | 6.169362000  | -6.069412000 | 5.343189000  |
| H        | 4.791914000  | -7.059856000 | 5.836282000  |
| H        | 5.484996000  | -5.881886000 | 6.961290000  |
| C        | 3.905484000  | -5.302181000 | 3.903958000  |
| H        | 3.156987000  | -4.603848000 | 3.520165000  |
| H        | 3.501971000  | -6.316386000 | 3.806826000  |
| H        | 4.793415000  | -5.236679000 | 3.265207000  |
| C        | 3.996782000  | -0.245377000 | 7.317396000  |
| H        | 3.132552000  | -0.701986000 | 7.811161000  |
| C        | 3.478029000  | 0.912464000  | 6.454729000  |
| H        | 4.296522000  | 1.397898000  | 5.911600000  |
| H        | 2.996226000  | 1.669413000  | 7.083015000  |
| H        | 2.740802000  | 0.570267000  | 5.725165000  |
| C        | 4.929942000  | 0.291795000  | 8.413836000  |

|   |              |              |              |
|---|--------------|--------------|--------------|
| H | 5.340079000  | -0.508773000 | 9.037590000  |
| H | 4.386953000  | 0.983624000  | 9.066857000  |
| H | 5.776570000  | 0.841053000  | 7.987626000  |
| C | -1.443180000 | -4.000158000 | 6.729577000  |
| C | -2.506845000 | -3.110912000 | 7.011893000  |
| C | -3.791379000 | -3.441574000 | 6.568177000  |
| H | -4.613937000 | -2.761352000 | 6.773947000  |
| C | -4.039494000 | -4.623308000 | 5.881381000  |
| H | -5.045953000 | -4.863765000 | 5.549933000  |
| C | -2.990242000 | -5.499216000 | 5.627636000  |
| H | -3.187043000 | -6.429323000 | 5.100337000  |
| C | -1.684743000 | -5.211351000 | 6.037587000  |
| C | -2.305727000 | -1.820341000 | 7.793875000  |
| H | -1.267416000 | -1.799882000 | 8.141284000  |
| C | -2.521929000 | -0.584748000 | 6.910314000  |
| H | -1.822849000 | -0.563251000 | 6.071487000  |
| H | -2.369412000 | 0.330605000  | 7.492360000  |
| H | -3.540415000 | -0.560615000 | 6.506984000  |
| C | -3.213235000 | -1.747144000 | 9.031918000  |
| H | -4.269902000 | -1.675884000 | 8.751779000  |
| H | -2.971792000 | -0.858949000 | 9.625815000  |
| H | -3.104455000 | -2.624184000 | 9.677790000  |
| C | -0.578351000 | -6.215827000 | 5.742615000  |
| H | 0.344650000  | -5.832865000 | 6.189589000  |
| C | -0.863276000 | -7.585084000 | 6.378375000  |
| H | -1.023414000 | -7.509280000 | 7.458465000  |
| H | -0.020619000 | -8.264879000 | 6.210538000  |
| H | -1.754174000 | -8.052100000 | 5.944254000  |
| C | -0.335691000 | -6.366490000 | 4.233739000  |
| H | -1.229140000 | -6.748609000 | 3.727322000  |
| H | 0.478866000  | -7.075602000 | 4.047807000  |
| H | -0.063922000 | -5.412923000 | 3.773100000  |
| C | 3.831782000  | -5.352902000 | -0.826567000 |
| H | 4.463581000  | -5.088322000 | -1.677313000 |
| H | 3.759486000  | -6.439611000 | -0.760335000 |
| H | 4.342063000  | -4.989398000 | 0.072041000  |
| C | 2.463974000  | -4.713599000 | -0.931214000 |
| C | 1.374629000  | -5.544137000 | -0.597166000 |
| H | 1.654672000  | -6.535020000 | -0.258610000 |
| C | -0.014347000 | -5.354891000 | -0.755359000 |
| C | -0.872355000 | -6.573273000 | -0.489072000 |
| H | -1.302658000 | -6.507056000 | 0.516441000  |
| H | -0.285730000 | -7.491827000 | -0.544810000 |
| H | -1.707666000 | -6.638808000 | -1.189218000 |
| C | 3.501855000  | -2.756411000 | -1.845709000 |
| C | 3.750987000  | -2.809770000 | -3.239545000 |
| C | 4.814343000  | -2.069273000 | -3.763822000 |
| H | 5.013539000  | -2.112634000 | -4.831711000 |
| C | 5.620929000  | -1.282443000 | -2.950731000 |
| H | 6.439356000  | -0.709120000 | -3.378123000 |
| C | 5.378000000  | -1.247992000 | -1.583993000 |
| H | 6.018392000  | -0.647242000 | -0.942972000 |
| C | 4.336152000  | -1.982010000 | -1.006593000 |
| C | 2.918811000  | -3.668235000 | -4.181137000 |
| H | 2.101220000  | -4.102267000 | -3.597775000 |
| C | 3.743844000  | -4.827781000 | -4.761311000 |
| H | 3.118828000  | -5.459921000 | -5.402169000 |

|    |              |              |              |
|----|--------------|--------------|--------------|
| H  | 4.165262000  | -5.461172000 | -3.974904000 |
| H  | 4.576199000  | -4.457047000 | -5.370331000 |
| C  | 2.296514000  | -2.838294000 | -5.310087000 |
| H  | 1.656625000  | -2.044582000 | -4.916068000 |
| H  | 1.686724000  | -3.474228000 | -5.960417000 |
| H  | 3.065049000  | -2.372770000 | -5.935949000 |
| C  | 4.171570000  | -1.947434000 | 0.504909000  |
| H  | 3.354484000  | -2.628152000 | 0.766748000  |
| C  | 3.795803000  | -0.549049000 | 1.011743000  |
| H  | 4.575263000  | 0.184313000  | 0.780358000  |
| H  | 3.667020000  | -0.555908000 | 2.099654000  |
| H  | 2.865981000  | -0.196204000 | 0.558889000  |
| C  | 5.441848000  | -2.438207000 | 1.215201000  |
| H  | 6.278941000  | -1.750604000 | 1.050017000  |
| H  | 5.754075000  | -3.423581000 | 0.855023000  |
| H  | 5.278460000  | -2.502621000 | 2.295032000  |
| C  | -1.980455000 | -4.168726000 | -1.446472000 |
| C  | -2.960592000 | -3.881585000 | -0.468342000 |
| C  | -4.295539000 | -3.757484000 | -0.868576000 |
| H  | -5.051685000 | -3.531861000 | -0.120691000 |
| C  | -4.676482000 | -3.931028000 | -2.192558000 |
| H  | -5.720028000 | -3.836430000 | -2.481101000 |
| C  | -3.710310000 | -4.240499000 | -3.142068000 |
| H  | -4.008519000 | -4.395008000 | -4.175945000 |
| C  | -2.360801000 | -4.360119000 | -2.797846000 |
| C  | -2.627664000 | -3.742272000 | 1.008984000  |
| H  | -1.555715000 | -3.931802000 | 1.129045000  |
| C  | -2.912980000 | -2.328910000 | 1.533009000  |
| H  | -2.345380000 | -1.576093000 | 0.980757000  |
| H  | -2.647215000 | -2.251031000 | 2.592911000  |
| H  | -3.974233000 | -2.074613000 | 1.443008000  |
| C  | -3.388538000 | -4.777175000 | 1.851028000  |
| H  | -4.468206000 | -4.591305000 | 1.826447000  |
| H  | -3.071311000 | -4.729099000 | 2.896972000  |
| H  | -3.225008000 | -5.796411000 | 1.487071000  |
| C  | -1.354589000 | -4.726053000 | -3.879297000 |
| H  | -0.355969000 | -4.661001000 | -3.436707000 |
| C  | -1.556381000 | -6.170658000 | -4.363553000 |
| H  | -1.478076000 | -6.889525000 | -3.542488000 |
| H  | -0.801353000 | -6.433492000 | -5.113120000 |
| H  | -2.542467000 | -6.298997000 | -4.824515000 |
| C  | -1.403439000 | -3.753640000 | -5.063364000 |
| H  | -2.378788000 | -3.773078000 | -5.560785000 |
| H  | -0.651233000 | -4.025484000 | -5.811186000 |
| H  | -1.207598000 | -2.726625000 | -4.744827000 |
| Mg | -1.112390000 | 2.639326000  | -5.787831000 |
| O  | -1.068546000 | 3.112605000  | -3.736710000 |
| N  | -2.838982000 | 2.930022000  | -6.881613000 |
| C  | -0.748479000 | 2.007820000  | -3.210816000 |
| Mg | -0.550101000 | 2.477838000  | 1.042334000  |
| O  | -0.581176000 | 0.691909000  | -5.203863000 |
| N  | 0.100692000  | 3.664519000  | -7.106351000 |
| C  | -0.504320000 | 0.796571000  | -3.946101000 |
| O  | 0.099037000  | -1.100739000 | -2.398899000 |
| N  | -2.359014000 | 3.440010000  | 1.317358000  |
| C  | -0.220255000 | 0.068507000  | -2.707456000 |
| O  | -0.442942000 | 1.592643000  | -0.727845000 |

|   |              |              |               |
|---|--------------|--------------|---------------|
| N | 0.589279000  | 4.202925000  | 1.105774000   |
| C | -0.473097000 | 1.320274000  | -1.943830000  |
| C | -4.097632000 | 3.543731000  | -8.905928000  |
| H | -4.830509000 | 4.148944000  | -8.364817000  |
| H | -3.925486000 | 3.994543000  | -9.884102000  |
| H | -4.554769000 | 2.560683000  | -9.050168000  |
| C | -2.809554000 | 3.427634000  | -8.121513000  |
| C | -1.652029000 | 3.884504000  | -8.778228000  |
| H | -1.816600000 | 4.233469000  | -9.790313000  |
| C | -0.334976000 | 4.046691000  | -8.310352000  |
| C | 0.621311000  | 4.726863000  | -9.264604000  |
| H | 1.466386000  | 4.073951000  | -9.500319000  |
| H | 0.122835000  | 5.001476000  | -10.195090000 |
| H | 1.044384000  | 5.629315000  | -8.814147000  |
| C | -4.113653000 | 2.610541000  | -6.306873000  |
| C | -4.793103000 | 3.590356000  | -5.543638000  |
| C | -6.009233000 | 3.247754000  | -4.944505000  |
| H | -6.541000000 | 3.994575000  | -4.360315000  |
| C | -6.551590000 | 1.975161000  | -5.081294000  |
| H | -7.495785000 | 1.728008000  | -4.603748000  |
| C | -5.879265000 | 1.024400000  | -5.838787000  |
| H | -6.308150000 | 0.031990000  | -5.951985000  |
| C | -4.666100000 | 1.318210000  | -6.469739000  |
| C | -4.255778000 | 5.004867000  | -5.369238000  |
| H | -3.332893000 | 5.083253000  | -5.952782000  |
| C | -5.232588000 | 6.059573000  | -5.911200000  |
| H | -6.169362000 | 6.069412000  | -5.343189000  |
| H | -4.791914000 | 7.059856000  | -5.836282000  |
| H | -5.484996000 | 5.881886000  | -6.961290000  |
| C | -3.905484000 | 5.302181000  | -3.903958000  |
| H | -3.156987000 | 4.603848000  | -3.520165000  |
| H | -3.501971000 | 6.316386000  | -3.806826000  |
| H | -4.793415000 | 5.236679000  | -3.265207000  |
| C | -3.996782000 | 0.245377000  | -7.317396000  |
| H | -3.132552000 | 0.701986000  | -7.811161000  |
| C | -3.478029000 | -0.912464000 | -6.454729000  |
| H | -4.296522000 | -1.397898000 | -5.911600000  |
| H | -2.996226000 | -1.669413000 | -7.083015000  |
| H | -2.740802000 | -0.570267000 | -5.725165000  |
| C | -4.929942000 | -0.291795000 | -8.413836000  |
| H | -5.340079000 | 0.508773000  | -9.037590000  |
| H | -4.386953000 | -0.983624000 | -9.066857000  |
| H | -5.776570000 | -0.841053000 | -7.987626000  |
| C | 1.443180000  | 4.000158000  | -6.729577000  |
| C | 2.506845000  | 3.110912000  | -7.011893000  |
| C | 3.791379000  | 3.441574000  | -6.568177000  |
| H | 4.613937000  | 2.761352000  | -6.773947000  |
| C | 4.039494000  | 4.623308000  | -5.881381000  |
| H | 5.045953000  | 4.863765000  | -5.549933000  |
| C | 2.990242000  | 5.499216000  | -5.627636000  |
| H | 3.187043000  | 6.429323000  | -5.100337000  |
| C | 1.684743000  | 5.211351000  | -6.037587000  |
| C | 2.305727000  | 1.820341000  | -7.793875000  |
| H | 1.267416000  | 1.799882000  | -8.141284000  |
| C | 2.521929000  | 0.584748000  | -6.910314000  |
| H | 1.822849000  | 0.563251000  | -6.071487000  |
| H | 2.369412000  | -0.330605000 | -7.492360000  |

|   |              |              |              |
|---|--------------|--------------|--------------|
| H | 3.540415000  | 0.560615000  | -6.506984000 |
| C | 3.213235000  | 1.747144000  | -9.031918000 |
| H | 4.269902000  | 1.675884000  | -8.751779000 |
| H | 2.971792000  | 0.858949000  | -9.625815000 |
| H | 3.104455000  | 2.624184000  | -9.677790000 |
| C | 0.578351000  | 6.215827000  | -5.742615000 |
| H | -0.344650000 | 5.832865000  | -6.189589000 |
| C | 0.863276000  | 7.585084000  | -6.378375000 |
| H | 1.023414000  | 7.509280000  | -7.458465000 |
| H | 0.020619000  | 8.264879000  | -6.210538000 |
| H | 1.754174000  | 8.052100000  | -5.944254000 |
| C | 0.335691000  | 6.366490000  | -4.233739000 |
| H | 1.229140000  | 6.748609000  | -3.727322000 |
| H | -0.478866000 | 7.075602000  | -4.047807000 |
| H | 0.063922000  | 5.412923000  | -3.773100000 |
| C | -3.831782000 | 5.352902000  | 0.826567000  |
| H | -4.463581000 | 5.088322000  | 1.677313000  |
| H | -3.759486000 | 6.439611000  | 0.760335000  |
| H | -4.342063000 | 4.989398000  | -0.072041000 |
| C | -2.463974000 | 4.713599000  | 0.931214000  |
| C | -1.374629000 | 5.544137000  | 0.597166000  |
| H | -1.654672000 | 6.535020000  | 0.258610000  |
| C | 0.014347000  | 5.354891000  | 0.755359000  |
| C | 0.872355000  | 6.573273000  | 0.489072000  |
| H | 1.302658000  | 6.507056000  | -0.516441000 |
| H | 0.285730000  | 7.491827000  | 0.544810000  |
| H | 1.707666000  | 6.638808000  | 1.189218000  |
| C | -3.501855000 | 2.756411000  | 1.845709000  |
| C | -3.750987000 | 2.809770000  | 3.239545000  |
| C | -4.814343000 | 2.069273000  | 3.763822000  |
| H | -5.013539000 | 2.112634000  | 4.831711000  |
| C | -5.620929000 | 1.282443000  | 2.950731000  |
| H | -6.439356000 | 0.709120000  | 3.378123000  |
| C | -5.378000000 | 1.247992000  | 1.583993000  |
| H | -6.018392000 | 0.647242000  | 0.942972000  |
| C | -4.336152000 | 1.982010000  | 1.006593000  |
| C | -2.918811000 | 3.668235000  | 4.181137000  |
| H | -2.101220000 | 4.102267000  | 3.597775000  |
| C | -3.743844000 | 4.827781000  | 4.761311000  |
| H | -3.118828000 | 5.459921000  | 5.402169000  |
| H | -4.165262000 | 5.461172000  | 3.974904000  |
| H | -4.576199000 | 4.457047000  | 5.370331000  |
| C | -2.296514000 | 2.838294000  | 5.310087000  |
| H | -1.656625000 | 2.044582000  | 4.916068000  |
| H | -1.686724000 | 3.474228000  | 5.960417000  |
| H | -3.065049000 | 2.372770000  | 5.935949000  |
| C | -4.171570000 | 1.947434000  | -0.504909000 |
| H | -3.354484000 | 2.628152000  | -0.766748000 |
| C | -3.795803000 | 0.549049000  | -1.011743000 |
| H | -4.575263000 | -0.184313000 | -0.780358000 |
| H | -3.667020000 | 0.555908000  | -2.099654000 |
| H | -2.865981000 | 0.196204000  | -0.558889000 |
| C | -5.441848000 | 2.438207000  | -1.215201000 |
| H | -6.278941000 | 1.750604000  | -1.050017000 |
| H | -5.754075000 | 3.423581000  | -0.855023000 |
| H | -5.278460000 | 2.502621000  | -2.295032000 |
| C | 1.980455000  | 4.168726000  | 1.446472000  |

|   |             |             |              |
|---|-------------|-------------|--------------|
| C | 2.960592000 | 3.881585000 | 0.468342000  |
| C | 4.295539000 | 3.757484000 | 0.868576000  |
| H | 5.051685000 | 3.531861000 | 0.120691000  |
| C | 4.676482000 | 3.931028000 | 2.192558000  |
| H | 5.720028000 | 3.836430000 | 2.481101000  |
| C | 3.710310000 | 4.240499000 | 3.142068000  |
| H | 4.008519000 | 4.395008000 | 4.175945000  |
| C | 2.360801000 | 4.360119000 | 2.797846000  |
| C | 2.627664000 | 3.742272000 | -1.008984000 |
| H | 1.555715000 | 3.931802000 | -1.129045000 |
| C | 2.912980000 | 2.328910000 | -1.533009000 |
| H | 2.345380000 | 1.576093000 | -0.980757000 |
| H | 2.647215000 | 2.251031000 | -2.592911000 |
| H | 3.974233000 | 2.074613000 | -1.443008000 |
| C | 3.388538000 | 4.777175000 | -1.851028000 |
| H | 4.468206000 | 4.591305000 | -1.826447000 |
| H | 3.071311000 | 4.729099000 | -2.896972000 |
| H | 3.225008000 | 5.796411000 | -1.487071000 |
| C | 1.354589000 | 4.726053000 | 3.879297000  |
| H | 0.355969000 | 4.661001000 | 3.436707000  |
| C | 1.556381000 | 6.170658000 | 4.363553000  |
| H | 1.478076000 | 6.889525000 | 3.542488000  |
| H | 0.801353000 | 6.433492000 | 5.113120000  |
| H | 2.542467000 | 6.298997000 | 4.824515000  |
| C | 1.403439000 | 3.753640000 | 5.063364000  |
| H | 2.378788000 | 3.773078000 | 5.560785000  |
| H | 0.651233000 | 4.025484000 | 5.811186000  |
| H | 1.207598000 | 2.726625000 | 4.744827000  |

## 6

|    |              |              |              |
|----|--------------|--------------|--------------|
| Mo | 2.686687000  | 4.386119000  | -0.146633000 |
| Mg | -2.826156000 | 0.199938000  | -0.046233000 |
| O  | -0.848900000 | 0.573055000  | 0.009370000  |
| N  | -2.700445000 | -2.754645000 | 1.263112000  |
| C  | 0.332418000  | 0.139264000  | 0.004562000  |
| Mg | 2.687648000  | -1.385847000 | 0.043155000  |
| O  | 0.670002000  | -1.079025000 | 0.044783000  |
| N  | -3.297891000 | -3.015125000 | -0.767942000 |
| C  | 1.501502000  | 1.154500000  | -0.045766000 |
| O  | 2.655408000  | 0.618443000  | -0.042421000 |
| N  | -3.779339000 | 1.224710000  | -1.595242000 |
| C  | 1.253977000  | 2.526263000  | -0.084616000 |
| O  | -0.992594000 | 3.599866000  | -0.074865000 |
| N  | -3.795609000 | 1.306425000  | 1.459553000  |
| C  | 0.024815000  | 3.024489000  | -0.078610000 |
| O  | 2.644762000  | 4.212290000  | -3.341063000 |
| N  | 3.697548000  | -2.440065000 | -1.424593000 |
| C  | 2.677191000  | 4.254209000  | -2.186616000 |
| O  | 5.294287000  | 2.539335000  | 0.069819000  |
| N  | 3.583675000  | -2.366199000 | 1.639417000  |
| C  | 4.305120000  | 3.128891000  | -0.010676000 |
| O  | 2.468164000  | 4.599624000  | 3.036467000  |
| C  | 2.561004000  | 4.504682000  | 1.887806000  |
| O  | 0.452987000  | 6.655746000  | -0.352554000 |
| C  | 1.227650000  | 5.800506000  | -0.278219000 |
| O  | 4.795356000  | 6.726541000  | -0.231229000 |
| C  | 4.013033000  | 5.868276000  | -0.200093000 |



|   |              |              |              |
|---|--------------|--------------|--------------|
| C | -2.950757000 | -2.052658000 | 0.126883000  |
| C | -3.569838000 | -2.790526000 | -2.176004000 |
| H | -3.547003000 | -1.723354000 | -2.386619000 |
| H | -4.556046000 | -3.176196000 | -2.444049000 |
| H | -2.811608000 | -3.285747000 | -2.788135000 |
| C | -3.624804000 | -5.514017000 | -0.971179000 |
| H | -3.541480000 | -6.394055000 | -0.330268000 |
| H | -2.955448000 | -5.663228000 | -1.825848000 |
| H | -4.650461000 | -5.481597000 | -1.356328000 |
| C | -3.279800000 | -4.285155000 | -0.206018000 |
| C | -2.900645000 | -4.117862000 | 1.094247000  |
| C | -2.714510000 | -5.105402000 | 2.191509000  |
| H | -2.953685000 | -6.111311000 | 1.840523000  |
| H | -3.364330000 | -4.889369000 | 3.046971000  |
| H | -1.681455000 | -5.118718000 | 2.556095000  |
| C | -2.219341000 | -2.179878000 | 2.506576000  |
| H | -2.049588000 | -1.115640000 | 2.366725000  |
| H | -1.273008000 | -2.643279000 | 2.795036000  |
| H | -2.953156000 | -2.303577000 | 3.306594000  |
| C | -4.552645000 | 3.358354000  | -2.559901000 |
| H | -3.810394000 | 3.274852000  | -3.357532000 |
| H | -4.630990000 | 4.404298000  | -2.259711000 |
| H | -5.513042000 | 3.054799000  | -2.988789000 |
| C | -4.183863000 | 2.484991000  | -1.380186000 |
| C | -4.340200000 | 3.075147000  | -0.118044000 |
| H | -4.647967000 | 4.114299000  | -0.140532000 |
| C | -4.259830000 | 2.524740000  | 1.176848000  |
| C | -4.735147000 | 3.449373000  | 2.278836000  |
| H | -5.045170000 | 2.908923000  | 3.174016000  |
| H | -5.563745000 | 4.069656000  | 1.930143000  |
| H | -3.919668000 | 4.124385000  | 2.561991000  |
| C | -3.959759000 | 0.678399000  | -2.903874000 |
| C | -5.235186000 | 0.182446000  | -3.282750000 |
| C | -5.370675000 | -0.454696000 | -4.519381000 |
| H | -6.342656000 | -0.844532000 | -4.811865000 |
| C | -4.290966000 | -0.597500000 | -5.384581000 |
| H | -4.417646000 | -1.094773000 | -6.342618000 |
| C | -3.054726000 | -0.079358000 | -5.020682000 |
| H | -2.215722000 | -0.166678000 | -5.706391000 |
| C | -2.864652000 | 0.568127000  | -3.794344000 |
| C | -6.456565000 | 0.301758000  | -2.379120000 |
| H | -6.192374000 | 0.952445000  | -1.540681000 |
| C | -6.853981000 | -1.059148000 | -1.789255000 |
| H | -7.100739000 | -1.776281000 | -2.581098000 |
| H | -7.735831000 | -0.957731000 | -1.146817000 |
| H | -6.046967000 | -1.484143000 | -1.184887000 |
| C | -7.656021000 | 0.934954000  | -3.099537000 |
| H | -7.396683000 | 1.894588000  | -3.556842000 |
| H | -8.474409000 | 1.108650000  | -2.392437000 |
| H | -8.043046000 | 0.286730000  | -3.893399000 |
| C | -1.497146000 | 1.152722000  | -3.475871000 |
| H | -1.555571000 | 1.609711000  | -2.483223000 |
| C | -1.108495000 | 2.257017000  | -4.471461000 |
| H | -1.003800000 | 1.860105000  | -5.487448000 |
| H | -0.149760000 | 2.704164000  | -4.190039000 |
| H | -1.854372000 | 3.057010000  | -4.504102000 |
| C | -0.411097000 | 0.070241000  | -3.435509000 |

|   |              |              |              |
|---|--------------|--------------|--------------|
| H | -0.646021000 | -0.715891000 | -2.711722000 |
| H | 0.554478000  | 0.506492000  | -3.160259000 |
| H | -0.280297000 | -0.408167000 | -4.411708000 |
| C | -3.886953000 | 0.818693000  | 2.801665000  |
| C | -2.883267000 | 1.117898000  | 3.755433000  |
| C | -2.978599000 | 0.547296000  | 5.029915000  |
| H | -2.210814000 | 0.771775000  | 5.765899000  |
| C | -4.035255000 | -0.284591000 | 5.378983000  |
| H | -4.094977000 | -0.705714000 | 6.379151000  |
| C | -5.024246000 | -0.559890000 | 4.440723000  |
| H | -5.861637000 | -1.194166000 | 4.719947000  |
| C | -4.969758000 | -0.027900000 | 3.148401000  |
| C | -1.709112000 | 2.038699000  | 3.453830000  |
| H | -1.830223000 | 2.414007000  | 2.433584000  |
| C | -1.672674000 | 3.247843000  | 4.401980000  |
| H | -2.620726000 | 3.793049000  | 4.407636000  |
| H | -0.881395000 | 3.941924000  | 4.100716000  |
| H | -1.463761000 | 2.940189000  | 5.432688000  |
| C | -0.369619000 | 1.291027000  | 3.518530000  |
| H | 0.454101000  | 1.960171000  | 3.252112000  |
| H | -0.344703000 | 0.440449000  | 2.832374000  |
| H | -0.172305000 | 0.907684000  | 4.525247000  |
| C | -6.096823000 | -0.325947000 | 2.170122000  |
| H | -5.751621000 | -0.025561000 | 1.175197000  |
| C | -6.456835000 | -1.815745000 | 2.109691000  |
| H | -5.582235000 | -2.430364000 | 1.874943000  |
| H | -7.210456000 | -1.991070000 | 1.334850000  |
| H | -6.877866000 | -2.175299000 | 3.055069000  |
| C | -7.341746000 | 0.513400000  | 2.498658000  |
| H | -7.726683000 | 0.268729000  | 3.495326000  |
| H | -8.140757000 | 0.322281000  | 1.773420000  |
| H | -7.120055000 | 1.584171000  | 2.481240000  |
| C | 5.507170000  | -3.912854000 | -2.210746000 |
| H | 4.875352000  | -4.680370000 | -2.670084000 |
| H | 6.406221000  | -4.395144000 | -1.824797000 |
| H | 5.788748000  | -3.224848000 | -3.010908000 |
| C | 4.749271000  | -3.203390000 | -1.110058000 |
| C | 5.220095000  | -3.436212000 | 0.196626000  |
| H | 6.126021000  | -4.029165000 | 0.246538000  |
| C | 4.699041000  | -3.073372000 | 1.455429000  |
| C | 5.524342000  | -3.530564000 | 2.640606000  |
| H | 6.297032000  | -2.781192000 | 2.846312000  |
| H | 6.032474000  | -4.472946000 | 2.424778000  |
| H | 4.927192000  | -3.645678000 | 3.545745000  |
| C | 3.330390000  | -2.317539000 | -2.807555000 |
| C | 2.384310000  | -3.210102000 | -3.365937000 |
| C | 1.994111000  | -3.037631000 | -4.697290000 |
| H | 1.266735000  | -3.720457000 | -5.129792000 |
| C | 2.523117000  | -2.018631000 | -5.479640000 |
| H | 2.212536000  | -1.902164000 | -6.514548000 |
| C | 3.460449000  | -1.155383000 | -4.927365000 |
| H | 3.880884000  | -0.362384000 | -5.540349000 |
| C | 3.882897000  | -1.281996000 | -3.599678000 |
| C | 1.778759000  | -4.353544000 | -2.566099000 |
| H | 2.292674000  | -4.389756000 | -1.601232000 |
| C | 1.980251000  | -5.715277000 | -3.246478000 |
| H | 1.433848000  | -5.780372000 | -4.193823000 |

|   |              |              |              |
|---|--------------|--------------|--------------|
| H | 1.615257000  | -6.522007000 | -2.600852000 |
| H | 3.035448000  | -5.908792000 | -3.462700000 |
| C | 0.288628000  | -4.107542000 | -2.289393000 |
| H | 0.131836000  | -3.173363000 | -1.742502000 |
| H | -0.132857000 | -4.925152000 | -1.693348000 |
| H | -0.273161000 | -4.048769000 | -3.229258000 |
| C | 4.928096000  | -0.307876000 | -3.074047000 |
| H | 5.136840000  | -0.566159000 | -2.030990000 |
| C | 4.410024000  | 1.135411000  | -3.102339000 |
| H | 5.170311000  | 1.819076000  | -2.713241000 |
| H | 3.515402000  | 1.247017000  | -2.485729000 |
| H | 4.166115000  | 1.453545000  | -4.121496000 |
| C | 6.250176000  | -0.407631000 | -3.851808000 |
| H | 6.121117000  | -0.111728000 | -4.898761000 |
| H | 6.661561000  | -1.421850000 | -3.843982000 |
| H | 6.997507000  | 0.260215000  | -3.410340000 |
| C | 3.054342000  | -2.195905000 | 2.960053000  |
| C | 3.450936000  | -1.092029000 | 3.752449000  |
| C | 2.853135000  | -0.906753000 | 5.004446000  |
| H | 3.156188000  | -0.058345000 | 5.612254000  |
| C | 1.893039000  | -1.783914000 | 5.486587000  |
| H | 1.441631000  | -1.626434000 | 6.462371000  |
| C | 1.523921000  | -2.875128000 | 4.708743000  |
| H | 0.786845000  | -3.578741000 | 5.091143000  |
| C | 2.083669000  | -3.110113000 | 3.447163000  |
| C | 4.528864000  | -0.110185000 | 3.316416000  |
| H | 4.883703000  | -0.414288000 | 2.326309000  |
| C | 3.985874000  | 1.319153000  | 3.198047000  |
| H | 3.603932000  | 1.682726000  | 4.157941000  |
| H | 3.180118000  | 1.381706000  | 2.463621000  |
| H | 4.780486000  | 1.999585000  | 2.878313000  |
| C | 5.731353000  | -0.135311000 | 4.274525000  |
| H | 5.457868000  | 0.247448000  | 5.264086000  |
| H | 6.536074000  | 0.499162000  | 3.888112000  |
| H | 6.128404000  | -1.145348000 | 4.411882000  |
| C | 1.632647000  | -4.390856000 | 2.744262000  |
| H | 0.741988000  | -4.707788000 | 3.305723000  |
| C | 2.648064000  | -5.535634000 | 2.888066000  |
| H | 3.536835000  | -5.358715000 | 2.276276000  |
| H | 2.201747000  | -6.478781000 | 2.551504000  |
| H | 2.964236000  | -5.662954000 | 3.928061000  |
| C | 1.193242000  | -4.252474000 | 1.283871000  |
| H | 2.054695000  | -4.138307000 | 0.621450000  |
| H | 0.524735000  | -3.400738000 | 1.129151000  |
| H | 0.662801000  | -5.159533000 | 0.971377000  |

#### 4. References

1. J. Hicks, M. Juckel, A. Paparo, D. Dange, C. Jones, *Organometallics*, 2018, **37**, 4810.
2. S. P. Green, C. Jones, A. Stasch, *Science*, 2007, **318**, 1754.
3. N. Kuhn, T. Kratz, *Synthesis*, 1993, 561.

4. T. M. McPhillips, S. McPhillips, H. J. Chiu, A. E. Cohen, A. M. Deacon, P.J . Ellis, E. Garman, A. Gonzalez, N. K. Sauter, R. P. Phizackerley, S. M. Soltis and P. Kuhn, *J. Synchrotron Rad.*, 2002, **9**, 401.
5. W. J. Kabsch, *Appl. Cryst.*, 1993, **26**, 795.
6. G.M. Sheldrick, *SHELX-16*, University of Göttingen, 2016.
7. A. D. Becke, *J. Chem. Phys.* **1993**, 98, 5648; (b) K. Burke, J. P. Perdew, W. Yang, in *Electronic Density Functional Theory: Recent Progress and New Directions*, Eds: J. F. Dobson, G. Vignale, M. P. Das, Plenum, New York, 1998.
8. (a) A. D. McLean, G. S. Chandler, *J. Chem. Phys.***1980**, 72, 5639 ; (b) A. Hollwarth, M. Bohme, S. Dapprich, A.W. Ehlers, A. Gobbi, V. Jonas, K.F. Kohler, R. Stegmann, A. Veldkamp, G. Frenking *J. Chem. Phys.* **1993**, 208, 237; (c) T. H. Dunning Jr. and P. J. Hay, in *Modern Theoretical Chemistry*, Ed. H. F. Schaefer III, Vol. 3, Plenum, New York, 1977 1-28; (d) M. Dolg, U. Wedig, H. Stoll, and H. Preuss, *J. Chem. Phys.* **1987**, 86, 866; (e) X. Cao, M. Dolg, *J. Molec. Struct. (Theochem)* **2004**, 673, 203.
9. (a) P. C. Hariharan, J. A. Pople, *Theor. Chim. Acta* **1973**, 28, 213; (b) W. J. Hehre, R. Ditchfield, J. A. Pople, *J. Chem. Phys.* **1972**, 56, 2257.
10. *Gaussian 09, Revision A.02*, M. J. Frisch, G. W. Trucks, H. B. Schlegel, G. E. Scuseria, M. A. Robb, J. R. Cheeseman, G. Scalmani, V. Barone, B. Mennucci, G. A. Petersson, H. Nakatsuji, M. Caricato, X. Li, H. P. Hratchian, A. F. Izmaylov, J. Bloino, G. Zheng, J. L. Sonnenberg, M. Hada, M. Ehara, K. Toyota, R. Fukuda, J. Hasegawa, M. Ishida, T. Nakajima, Y. Honda, O. Kitao, H. Nakai, T. Vreven, J. A. Montgomery, Jr., J. E. Peralta, F. Ogliaro, M. Bearpark, J. J. Heyd, E. Brothers, K. N. Kudin, V. N. Staroverov, R. Kobayashi, J. Normand, K. Raghavachari, A. Rendell, J. C. Burant, S. S. Iyengar, J. Tomasi, M. Cossi, N. Rega, J. M. Millam, M. Klene, J. E. Knox, J. B. Cross, V. Bakken, C. Adamo, J. Jaramillo, R. Gomperts, R. E. Stratmann, O. Yazyev, A. J. Austin, R. Cammi, C. Pomelli, J. W. Ochterski, R. L. Martin, K. Morokuma, V. G. Zakrzewski, G. A. Voth, P. Salvador, J. J. Dannenberg, S. Dapprich, A. D. Daniels, Ö. Farkas, J. B. Foresman, J. V. Ortiz, J. Cioslowski, and D. J. Fox, Gaussian, Inc., Wallingford CT, 2009.
11. NBO 6.0. E. D. Glendening, J. K. Badenhoop, A. E. Reed, J. E. Carpenter, J. A. Bohmann, C. M. Morales, C. R. Landis, F. Weinhold, Theoretical Chemistry Institute, University of Wisconsin, Madison, WI, 2013.
